# Supplementary material for: WGCNA Reveals Hub Genes and Key Gene Regulatory Pathways of the Response of Soybean to Infection by Soybean mosaic virus
Source: MDPI journal article supplement (doi:10.3390/genes15050566), 2024-04-27
Supplement: s1 [file s1]

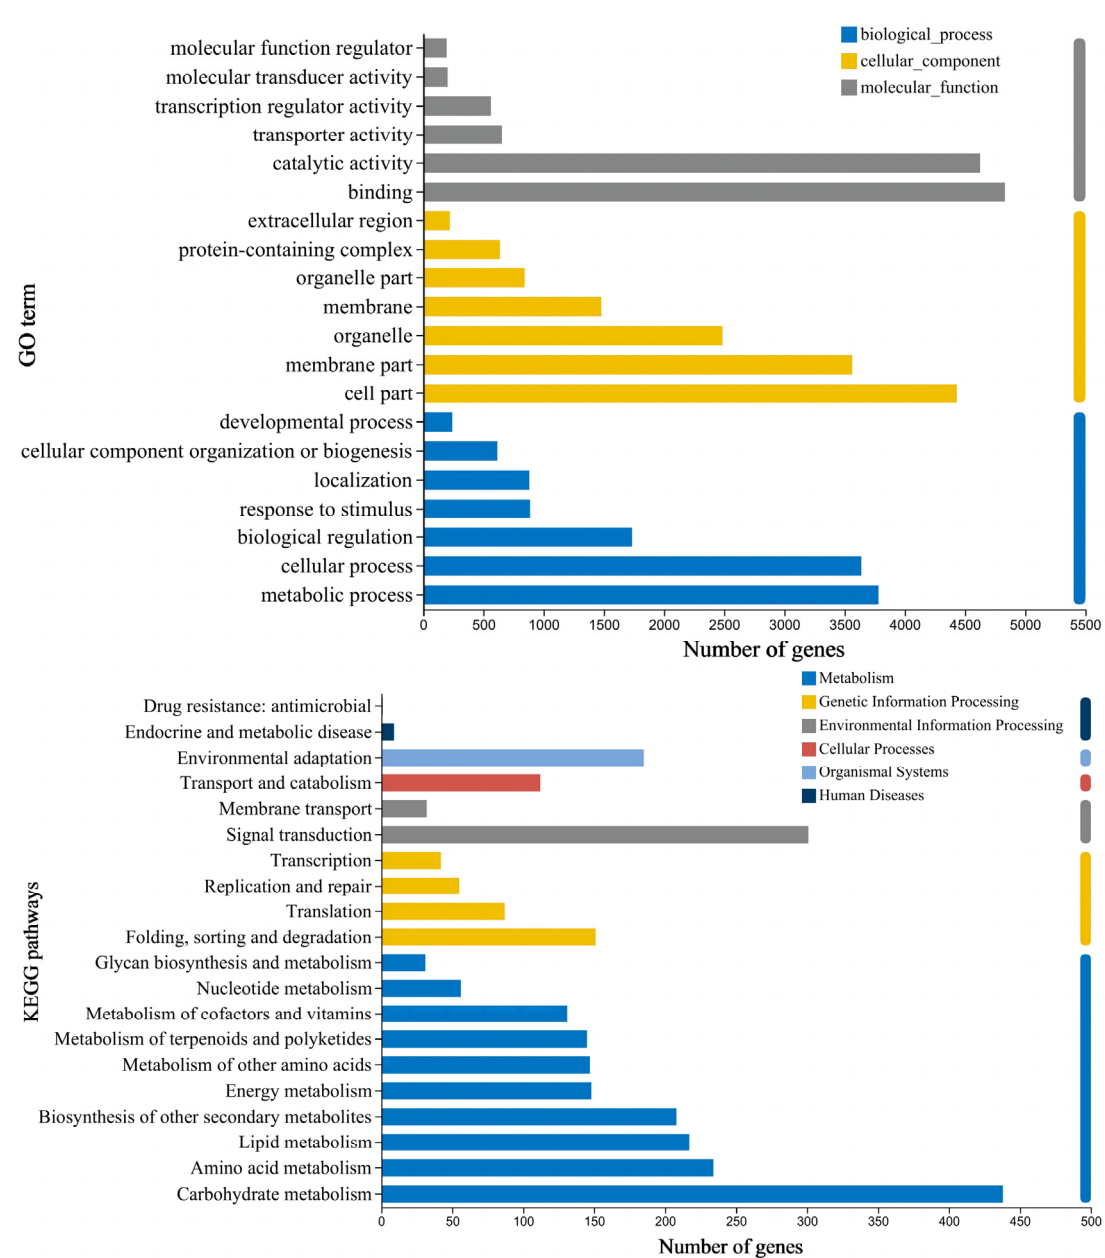

**Figure S1 Functional annotation of 10,190 DEGs.** (A) GO annotations analysis. (B) KEGG annotations analysis.

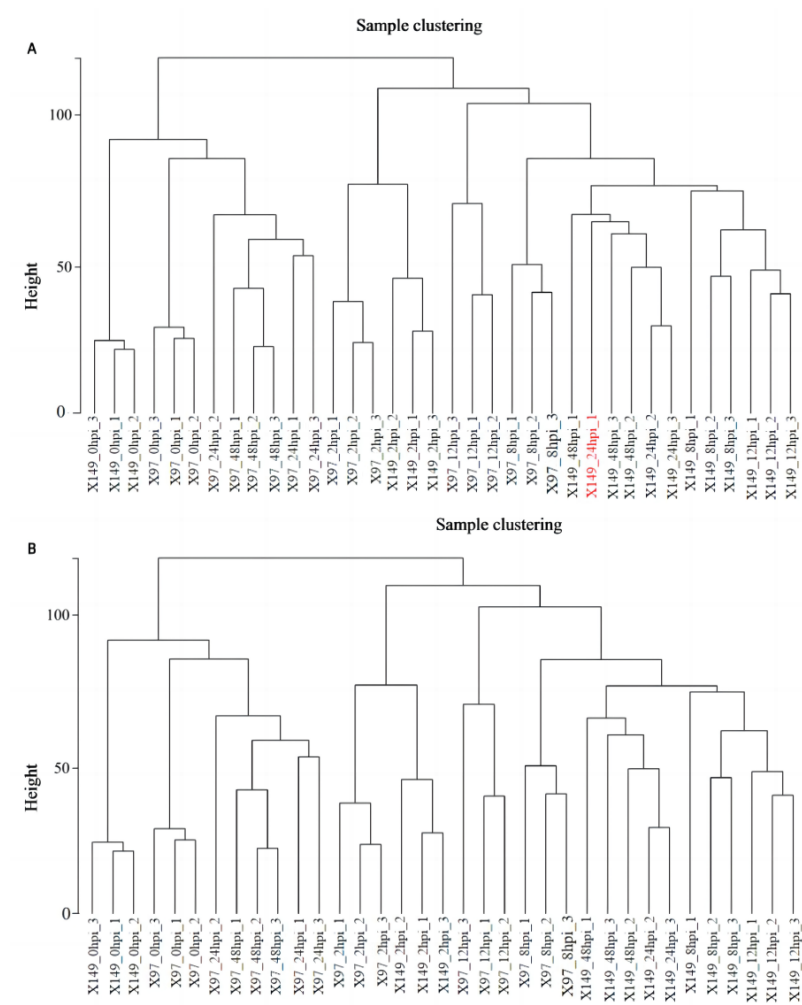

**Figure S2 Clustering dendrograms of samples.** (A) Dendrogram of all 36 samples. The one outlier sample is written in red fonts. (B) Dendrogram of 35 samples after removing the one outliers.
