# Supplementary material for: WGCNA Reveals Hub Genes and Key Gene Regulatory Pathways of the Response of Soybean to Infection by Soybean mosaic virus
Source: Genes (Basel). 2024 Apr 27;15(5):566. doi: 10.3390/genes15050566 (PMC11120672; doi:10.3390/genes15050566)
Supplement: Supplementary file 1 [file genes-15-00566-s001.zip › Supplementary table.xls]

## Sheet: Table S1
Table S1 Primers used for RT-qPCR.
Gene	Primer Sequence (5’ to 3’)		Annealing temperature (℃)
SC15 CP-primer	F	GGCGTGTGGGTAATGATGGA	59 ℃
	R	AATCGAAGGCATAACGGGC
Glyma.12G073000	F	GCTGACAGTTGATCCCACCA	60 ℃
	R	TGGCTCCATGCAGATTGGTT
Glyma.13G109800	F	TTGGAGCGGAAAGAGTTGCT	59 ℃
	R	TGCGCCAAAAGTGTGAATCG
Glyma.16G084700	F	TTGACTGGTGGTCATACGGC	60 ℃
	R	CCATGTCCCACTTAACCCCC
Glyma.18G238200	F	AAGGGGTGTTTGGCAAGGAA	60 ℃
	R	GTGGAGCCAGCAAGAGAGTT
Glyma.12G185400	F	TGGTGGATAGGGACCGAAGT	59 ℃
	R	CCTGAGGTTGAAGTGGTGGA
tublin	F	GGAGTTCACAGAGGCAGAG	60 ℃
	R	CACTTACGCATCACATAGC

## Sheet:  Table S2
Table S2 A statistical summary for all RNA-Seq samples.
Sample	Raw reads	Clean reads	Q20(%)	Q30(%)	GC content(%)	Total mapped	Uniquely mapped
X149_0hpi_1	43894582	43479584	97.98	94.07	44.59	41756646(96.04%)	39279796(90.34%)
X149_0hpi_2	45169852	44756394	98.07	94.25	44.55	43078330(96.25%)	40545612(90.59%)
X149_0hpi_3	45612870	45208384	98.08	94.32	44.87	43051475(95.23%)	40276043(89.09%)
X149_2hpi_1	44532420	44077592	98.03	94.21	45.62	42167707(95.67%)	38813288(88.06%)
X149_2hpi_2	43800650	43328900	97.99	94.11	45.43	41397378(95.54%)	38237783(88.25%)
X149_2hpi_3	47070454	46587264	98.07	94.32	46.11	44105274(94.67%)	40223941(86.34%)
X149_8hpi_1	42560544	41907024	98.02	94.22	45.63	39072519(93.24%)	35834026(85.51%)
X149_8hpi_2	42403764	41869396	97.98	94.11	45.75	39651451(94.7%)	36947883(88.25%)
X149_8hpi_3	50772204	50197152	97.92	93.94	45.14	48068739(95.76%)	45393000(90.43%)
X149_12hpi_1	41915798	41189316	97.95	94.01	46.31	37892959(92.0%)	35177575(85.4%)
X149_12hpi_2	42716826	42094474	97.91	93.91	45.16	40172885(95.44%)	37870964(89.97%)
X149_12hpi_3	45026188	44279498	97.72	93.64	45.73	40647653(91.8%)	37882912(85.55%)
X149_24hpi_1	43839512	43237730	97.94	94.02	46.69	39378695(91.07%)	36499082(84.41%)
X149_24hpi_2	44365788	43728056	97.92	94.02	45.66	40697520(93.07%)	37903901(86.68%)
X149_24hpi_3	41819574	41191174	97.98	94.14	45.33	38615847(93.75%)	36017727(87.44%)
X149_48hpi_1	46708974	46122242	98.02	94.21	45.44	43982348(95.36%)	41038951(88.98%)
X149_48hpi_2	43788802	43183620	97.92	94.05	45.91	40978647(94.89%)	38416333(88.96%)
X149_48hpi_3	44792302	44244464	98	94.17	46.1	41454247(93.69%)	38853400(87.82%)
X97_0hpi_1	44115722	43555554	98.01	94.19	44	41064652(94.28%)	38334799(88.01%)
X97_0hpi_2	43022494	42436148	97.94	94	43.68	40517669(95.48%)	37941431(89.41%)
X97_0hpi_3	42897804	42261682	97.95	94.05	44.81	37524045(88.79%)	34457831(81.53%)
X97_2hpi_1	42468756	41851716	97.98	94.14	44.78	39584568(94.58%)	36488108(87.18%)
X97_2hpi_2	44363632	43706068	97.56	92.94	44.14	41523528(95.01%)	38945407(89.11%)
X97_2hpi_3	60252268	59413906	98.02	94.15	44.37	56122838(94.46%)	52162979(87.8%)
X97_8hpi_1	64376262	63325958	98.12	94.41	46.42	57699346(91.11%)	52528226(82.95%)
X97_8hpi_2	45595904	44628766	97.99	94.22	46.51	38261264(85.73%)	34126873(76.47%)
X97_8hpi_3	48598374	47494816	97.86	93.89	46.56	43304374(91.18%)	39268229(82.68%)
X97_12hpi_1	45794622	44722618	97.99	94.2	44.94	39800131(88.99%)	36828780(82.35%)
X97_12hpi_2	43428024	42514408	97.93	94.08	44.07	40026624(94.15%)	37657085(88.57%)
X97_12hpi_3	46494838	45581104	97.98	94.16	45.59	43302213(95.0%)	40446414(88.74%)
X97_24hpi_1	48219804	47516792	98.03	94.27	45.26	44721690(94.12%)	41268254(86.85%)
X97_24hpi_2	42410320	41483802	97.92	94.02	46	36062042(86.93%)	32943486(79.41%)
X97_24hpi_3	45215134	44407574	98.05	94.3	45.86	38883237(87.56%)	35121427(79.09%)
X97_48hpi_1	43146284	42316542	98.05	94.3	44.99	39881199(94.24%)	37025152(87.5%)
X97_48hpi_2	53909294	53311814	98.06	94.21	44.93	51090796(95.83%)	47766375(89.6%)
X97_48hpi_3	58603820	57936102	98.11	94.36	44.8	55661546(96.07%)	52057901(89.85%)
Average	46214013	45531879	97.97	94.10	45.33	42533391(93.38%)	39460583(86.64%)
X149, The resistant line; X97, The susceptible line; hpi, hour post inoculation; 1, 2, 3 infer to three replicates.

## Sheet: Table S3
Table S3 GO annotation analysis of 10,190 DEGs.
Category	GO ID	Term	Gene numbers	Gene_IDs
biological process	GO:0032501	multicellular organismal process	118	Glyma.04G087500.Wm82.a4.v1Glyma.10G244600.Wm82.a4.v1Glyma.18G202800.Wm82.a4.v1Glyma.09G276502.Wm82.a4.v1Glyma.07G199000.Wm82.a4.v1Glyma.15G044400.Wm82.a4.v1Glyma.03G177500.Wm82.a4.v1Glyma.14G140800.Wm82.a4.v1Glyma.01G004000.Wm82.a4.v1Glyma.13G207900.Wm82.a4.v1Glyma.04G153000.Wm82.a4.v1Glyma.06G009100.Wm82.a4.v1Glyma.04G013500.Wm82.a4.v1Glyma.07G021000.Wm82.a4.v1Glyma.06G310500.Wm82.a4.v1Glyma.06G…
biological process	GO:0065007	biological regulation	1734	Glyma.06G249100.Wm82.a4.v1Glyma.02G082800.Wm82.a4.v1Glyma.02G112100.Wm82.a4.v1Glyma.07G241600.Wm82.a4.v1Glyma.11G096000.Wm82.a4.v1Glyma.06G163800.Wm82.a4.v1Glyma.02G009800.Wm82.a4.v1Glyma.04G027100.Wm82.a4.v1Glyma.15G078800.Wm82.a4.v1Glyma.08G207900.Wm82.a4.v1Glyma.05G109800.Wm82.a4.v1Glyma.08G047500.Wm82.a4.v1Glyma.08G365100.Wm82.a4.v1Glyma.18G024600.Wm82.a4.v1Glyma.03G177500.Wm82.a4.v1Glyma.15G…
				.Wm82.a4.v1Glyma.14G040200.Wm82.a4.v1Glyma.12G022100.Wm82.a4.v1Glyma.17G047200.Wm82.a4.v1Glyma.16G064100.Wm82.a4.v1Glyma.15G222102.Wm82.a4.v1Glyma.18G258400.Wm82.a4.v1Glyma.05G191700.Wm82.a4.v1Glyma.13G370000.Wm82.a4.v1Glyma.08G276300.Wm82.a4.v1Glyma.07G119100.Wm82.a4.v1Glyma.14G107100.Wm82.a4.v1Glyma.10G274600.Wm82.a4.v1Glyma.10G021100.Wm82.a4.v1Glyma.05G218400.Wm82.a4.v1Glyma.12G088400.Wm82.a4.…
biological process	GO:0051704	multi-organism process	111	Glyma.02G082800.Wm82.a4.v1Glyma.13G068500.Wm82.a4.v1Glyma.02G269600.Wm82.a4.v1Glyma.12G064000.Wm82.a4.v1Glyma.05G235200.Wm82.a4.v1Glyma.18G004200.Wm82.a4.v1Glyma.18G282100.Wm82.a4.v1Glyma.12G022800.Wm82.a4.v1Glyma.05G045300.Wm82.a4.v1Glyma.19G017200.Wm82.a4.v1Glyma.09G151700.Wm82.a4.v1Glyma.10G121524.Wm82.a4.v1Glyma.06G035300.Wm82.a4.v1Glyma.16G090000.Wm82.a4.v1Glyma.03G085000.Wm82.a4.v1Glyma.10G…
biological process	GO:0048511	rhythmic process	14	Glyma.15G229400.Wm82.a4.v1Glyma.12G055000.Wm82.a4.v1Glyma.11G158200.Wm82.a4.v1Glyma.11G154700.Wm82.a4.v1Glyma.13G191900.Wm82.a4.v1Glyma.08G073300.Wm82.a4.v1Glyma.13G199300.Wm82.a4.v1Glyma.08G179400.Wm82.a4.v1Glyma.15G237600.Wm82.a4.v1Glyma.05G118300.Wm82.a4.v1Glyma.04G141400.Wm82.a4.v1Glyma.11G130600.Wm82.a4.v1Glyma.04G133400.Wm82.a4.v1Glyma.15G053000.Wm82.a4.v1
biological process	GO:0022414	reproductive process	167	Glyma.08G354900.Wm82.a4.v1Glyma.12G022800.Wm82.a4.v1Glyma.12G198800.Wm82.a4.v1Glyma.12G140300.Wm82.a4.v1Glyma.01G007800.Wm82.a4.v1Glyma.03G144400.Wm82.a4.v1Glyma.06G260100.Wm82.a4.v1Glyma.15G065100.Wm82.a4.v1Glyma.01G090400.Wm82.a4.v1Glyma.04G036460.Wm82.a4.v1Glyma.U031624.Wm82.a4.v1Glyma.15G044400.Wm82.a4.v1Glyma.13G329700.Wm82.a4.v1Glyma.11G036633.Wm82.a4.v1Glyma.15G196300.Wm82.a4.v1Glyma.15G14…
biological process	GO:0040011	locomotion	7	Glyma.11G150452.Wm82.a4.v1Glyma.13G087500.Wm82.a4.v1Glyma.12G073000.Wm82.a4.v1Glyma.06G319460.Wm82.a4.v1Glyma.19G168000.Wm82.a4.v1Glyma.13G087400.Wm82.a4.v1Glyma.02G136700.Wm82.a4.v1
biological process	GO:0050896	response to stimulus	887	Glyma.07G196000.Wm82.a4.v1Glyma.01G217400.Wm82.a4.v1Glyma.02G082800.Wm82.a4.v1Glyma.13G068500.Wm82.a4.v1Glyma.02G048200.Wm82.a4.v1Glyma.02G269600.Wm82.a4.v1Glyma.03G191100.Wm82.a4.v1Glyma.06G163800.Wm82.a4.v1Glyma.02G017200.Wm82.a4.v1Glyma.20G214200.Wm82.a4.v1Glyma.06G006400.Wm82.a4.v1Glyma.15G078800.Wm82.a4.v1Glyma.19G214100.Wm82.a4.v1Glyma.12G195500.Wm82.a4.v1Glyma.10G229400.Wm82.a4.v1Glyma.06G…
biological process	GO:0002376	immune system process	32	Glyma.08G047300.Wm82.a4.v1Glyma.11G192300.Wm82.a4.v1Glyma.06G090800.Wm82.a4.v1Glyma.02G269600.Wm82.a4.v1Glyma.07G139400.Wm82.a4.v1Glyma.18G190000.Wm82.a4.v1Glyma.16G026900.Wm82.a4.v1Glyma.15G088100.Wm82.a4.v1Glyma.01G217700.Wm82.a4.v1Glyma.18G152400.Wm82.a4.v1Glyma.18G004200.Wm82.a4.v1Glyma.04G239400.Wm82.a4.v1Glyma.13G223900.Wm82.a4.v1Glyma.19G017200.Wm82.a4.v1Glyma.18G191600.Wm82.a4.v1Glyma.12G…
biological process	GO:0000003	reproduction	4	Glyma.12G203600.Wm82.a4.v1Glyma.01G204800.Wm82.a4.v1Glyma.11G096700.Wm82.a4.v1Glyma.12G022800.Wm82.a4.v1
biological process	GO:0098754	detoxification	16	Glyma.07G149400.Wm82.a4.v1Glyma.06G139300.Wm82.a4.v1Glyma.06G122600.Wm82.a4.v1Glyma.12G015100.Wm82.a4.v1Glyma.14G188300.Wm82.a4.v1Glyma.12G015500.Wm82.a4.v1Glyma.14G042600.Wm82.a4.v1Glyma.09G161600.Wm82.a4.v1Glyma.10G124700.Wm82.a4.v1Glyma.11G088200.Wm82.a4.v1Glyma.12G015400.Wm82.a4.v1Glyma.18G291700.Wm82.a4.v1Glyma.10G067500.Wm82.a4.v1Glyma.14G042200.Wm82.a4.v1Glyma.04G225500.Wm82.a4.v1Glyma.18G…
biological process	GO:0009987	cellular process	3639	Glyma.02G082800.Wm82.a4.v1Glyma.07G241600.Wm82.a4.v1Glyma.19G224500.Wm82.a4.v1Glyma.04G087500.Wm82.a4.v1Glyma.10G198500.Wm82.a4.v1Glyma.01G013500.Wm82.a4.v1Glyma.03G191100.Wm82.a4.v1Glyma.06G163800.Wm82.a4.v1Glyma.04G027100.Wm82.a4.v1Glyma.05G119900.Wm82.a4.v1Glyma.09G172100.Wm82.a4.v1Glyma.05G027250.Wm82.a4.v1Glyma.08G207900.Wm82.a4.v1Glyma.05G109800.Wm82.a4.v1Glyma.19G214100.Wm82.a4.v1Glyma.12G…
				4600.Wm82.a4.v1Glyma.08G059900.Wm82.a4.v1Glyma.17G093000.Wm82.a4.v1Glyma.16G137000.Wm82.a4.v1Glyma.02G226300.Wm82.a4.v1Glyma.03G253600.Wm82.a4.v1Glyma.04G236900.Wm82.a4.v1Glyma.04G183600.Wm82.a4.v1Glyma.17G099800.Wm82.a4.v1Glyma.09G251000.Wm82.a4.v1Glyma.09G173200.Wm82.a4.v1Glyma.11G222600.Wm82.a4.v1Glyma.03G099400.Wm82.a4.v1Glyma.08G068100.Wm82.a4.v1Glyma.04G180900.Wm82.a4.v1Glyma.10G154200.Wm82…
				a.20G022700.Wm82.a4.v1Glyma.09G099200.Wm82.a4.v1Glyma.16G198900.Wm82.a4.v1Glyma.15G149000.Wm82.a4.v1Glyma.04G094600.Wm82.a4.v1Glyma.08G062500.Wm82.a4.v1Glyma.15G154700.Wm82.a4.v1Glyma.08G083376.Wm82.a4.v1Glyma.01G215500.Wm82.a4.v1Glyma.18G066500.Wm82.a4.v1Glyma.18G167000.Wm82.a4.v1Glyma.11G015200.Wm82.a4.v1Glyma.08G064700.Wm82.a4.v1Glyma.08G123200.Wm82.a4.v1Glyma.02G283400.Wm82.a4.v1Glyma.01G1968…
biological process	GO:0022610	biological adhesion	1	Glyma.06G084000.Wm82.a4.v1
biological process	GO:0015976	carbon utilization	4	Glyma.18G138400.Wm82.a4.v1Glyma.08G286700.Wm82.a4.v1Glyma.15G057700.Wm82.a4.v1Glyma.02G213700.Wm82.a4.v1
biological process	GO:0001906	cell killing	1	Glyma.13G278000.Wm82.a4.v1
biological process	GO:0051179	localization	881	Glyma.14G088800.Wm82.a4.v1Glyma.02G082800.Wm82.a4.v1Glyma.17G096400.Wm82.a4.v1Glyma.03G040300.Wm82.a4.v1Glyma.08G059700.Wm82.a4.v1Glyma.14G012400.Wm82.a4.v1Glyma.16G088300.Wm82.a4.v1Glyma.17G234152.Wm82.a4.v1Glyma.01G041400.Wm82.a4.v1Glyma.10G193200.Wm82.a4.v1Glyma.07G022500.Wm82.a4.v1Glyma.05G109800.Wm82.a4.v1Glyma.08G047500.Wm82.a4.v1Glyma.12G075200.Wm82.a4.v1Glyma.08G142600.Wm82.a4.v1Glyma.18G…
biological process	GO:0032502	developmental process	241	Glyma.12G037700.Wm82.a4.v1Glyma.08G167900.Wm82.a4.v1Glyma.10G164100.Wm82.a4.v1Glyma.19G148700.Wm82.a4.v1Glyma.04G087500.Wm82.a4.v1Glyma.03G217500.Wm82.a4.v1Glyma.10G244600.Wm82.a4.v1Glyma.02G129100.Wm82.a4.v1Glyma.09G276502.Wm82.a4.v1Glyma.10G185500.Wm82.a4.v1Glyma.01G090400.Wm82.a4.v1Glyma.07G199000.Wm82.a4.v1Glyma.03G163100.Wm82.a4.v1Glyma.18G272300.Wm82.a4.v1Glyma.18G151400.Wm82.a4.v1Glyma.20G…
biological process	GO:0071840	cellular component organization or biogenesis	616	Glyma.08G048567.Wm82.a4.v1Glyma.12G096900.Wm82.a4.v1Glyma.19G224500.Wm82.a4.v1Glyma.10G198500.Wm82.a4.v1Glyma.06G209800.Wm82.a4.v1Glyma.06G195000.Wm82.a4.v1Glyma.04G027100.Wm82.a4.v1Glyma.02G259100.Wm82.a4.v1Glyma.19G214100.Wm82.a4.v1Glyma.08G285400.Wm82.a4.v1Glyma.06G143300.Wm82.a4.v1Glyma.01G004000.Wm82.a4.v1Glyma.16G045700.Wm82.a4.v1Glyma.18G067000.Wm82.a4.v1Glyma.11G216400.Wm82.a4.v1Glyma.02G…
biological process	GO:0019740	nitrogen utilization	8	Glyma.12G058000.Wm82.a4.v1Glyma.18G204800.Wm82.a4.v1Glyma.14G162300.Wm82.a4.v1Glyma.20G004100.Wm82.a4.v1Glyma.19G065600.Wm82.a4.v1Glyma.07G153800.Wm82.a4.v1Glyma.04G236900.Wm82.a4.v1Glyma.11G133800.Wm82.a4.v1
biological process	GO:0008152	metabolic process	3782	Glyma.04G189200.Wm82.a4.v1Glyma.07G241600.Wm82.a4.v1Glyma.17G156300.Wm82.a4.v1Glyma.01G013500.Wm82.a4.v1Glyma.02G125100.Wm82.a4.v1Glyma.04G027100.Wm82.a4.v1Glyma.05G119900.Wm82.a4.v1Glyma.09G172100.Wm82.a4.v1Glyma.05G027250.Wm82.a4.v1Glyma.12G096900.Wm82.a4.v1Glyma.19G214100.Wm82.a4.v1Glyma.09G199900.Wm82.a4.v1Glyma.18G243100.Wm82.a4.v1Glyma.09G003300.Wm82.a4.v1Glyma.14G200800.Wm82.a4.v1Glyma.02G…
				.Wm82.a4.v1Glyma.10G172200.Wm82.a4.v1Glyma.10G248600.Wm82.a4.v1Glyma.01G159100.Wm82.a4.v1Glyma.14G003400.Wm82.a4.v1Glyma.18G026800.Wm82.a4.v1Glyma.15G207200.Wm82.a4.v1Glyma.13G278650.Wm82.a4.v1Glyma.07G258700.Wm82.a4.v1Glyma.14G212700.Wm82.a4.v1Glyma.15G143700.Wm82.a4.v1Glyma.14G049000.Wm82.a4.v1Glyma.10G274700.Wm82.a4.v1Glyma.20G141200.Wm82.a4.v1Glyma.20G179600.Wm82.a4.v1Glyma.02G198300.Wm82.a4.…
				G326700.Wm82.a4.v1Glyma.03G164500.Wm82.a4.v1Glyma.07G052300.Wm82.a4.v1Glyma.14G020732.Wm82.a4.v1Glyma.13G176100.Wm82.a4.v1Glyma.18G034900.Wm82.a4.v1Glyma.02G272200.Wm82.a4.v1Glyma.13G372200.Wm82.a4.v1Glyma.18G284800.Wm82.a4.v1Glyma.14G223700.Wm82.a4.v1Glyma.01G007300.Wm82.a4.v1Glyma.03G160200.Wm82.a4.v1Glyma.16G208100.Wm82.a4.v1Glyma.04G066700.Wm82.a4.v1Glyma.20G007100.Wm82.a4.v1Glyma.16G084700.W…
biological process	GO:0023052	signaling	3	Glyma.13G067000.Wm82.a4.v1Glyma.01G038900.Wm82.a4.v1Glyma.02G025700.Wm82.a4.v1
biological process	GO:0008283	cell population proliferation	7	Glyma.01G195700.Wm82.a4.v1Glyma.17G159000.Wm82.a4.v1Glyma.12G181700.Wm82.a4.v1Glyma.10G164100.Wm82.a4.v1Glyma.19G246600.Wm82.a4.v1Glyma.03G249000.Wm82.a4.v1Glyma.10G066400.Wm82.a4.v1
biological process	GO:0040007	growth	19	Glyma.13G035600.Wm82.a4.v1Glyma.17G030700.Wm82.a4.v1Glyma.16G208300.Wm82.a4.v1Glyma.02G150100.Wm82.a4.v1Glyma.01G004000.Wm82.a4.v1Glyma.05G180400.Wm82.a4.v1Glyma.13G288300.Wm82.a4.v1Glyma.13G127300.Wm82.a4.v1Glyma.03G129200.Wm82.a4.v1Glyma.04G160100.Wm82.a4.v1Glyma.08G027500.Wm82.a4.v1Glyma.07G243200.Wm82.a4.v1Glyma.03G249200.Wm82.a4.v1Glyma.15G150900.Wm82.a4.v1Glyma.10G038800.Wm82.a4.v1Glyma.13G…
cellular component	GO:0044425	membrane part	3564	Glyma.12G068000.Wm82.a4.v1Glyma.19G224500.Wm82.a4.v1Glyma.04G087500.Wm82.a4.v1Glyma.10G198500.Wm82.a4.v1Glyma.01G013500.Wm82.a4.v1Glyma.02G277300.Wm82.a4.v1Glyma.18G038851.Wm82.a4.v1Glyma.04G058300.Wm82.a4.v1Glyma.15G078800.Wm82.a4.v1Glyma.12G096900.Wm82.a4.v1Glyma.05G109800.Wm82.a4.v1Glyma.10G109500.Wm82.a4.v1Glyma.18G243100.Wm82.a4.v1Glyma.09G003300.Wm82.a4.v1Glyma.10G132300.Wm82.a4.v1Glyma.01G…
				m82.a4.v1Glyma.05G125900.Wm82.a4.v1Glyma.18G049500.Wm82.a4.v1Glyma.18G102700.Wm82.a4.v1Glyma.07G263300.Wm82.a4.v1Glyma.03G168000.Wm82.a4.v1Glyma.14G080800.Wm82.a4.v1Glyma.15G091800.Wm82.a4.v1Glyma.20G118900.Wm82.a4.v1Glyma.19G075800.Wm82.a4.v1Glyma.11G010500.Wm82.a4.v1Glyma.03G220000.Wm82.a4.v1Glyma.20G189900.Wm82.a4.v1Glyma.08G062800.Wm82.a4.v1Glyma.02G075000.Wm82.a4.v1Glyma.11G074100.Wm82.a4.v1…
				G218800.Wm82.a4.v1Glyma.08G090000.Wm82.a4.v1Glyma.14G118550.Wm82.a4.v1Glyma.12G195900.Wm82.a4.v1Glyma.07G218200.Wm82.a4.v1Glyma.05G084200.Wm82.a4.v1Glyma.18G008600.Wm82.a4.v1Glyma.02G274400.Wm82.a4.v1Glyma.06G307000.Wm82.a4.v1Glyma.09G214300.Wm82.a4.v1Glyma.19G183400.Wm82.a4.v1Glyma.13G288300.Wm82.a4.v1Glyma.20G140300.Wm82.a4.v1Glyma.06G202300.Wm82.a4.v1Glyma.17G137300.Wm82.a4.v1Glyma.06G171100.W…
cellular component	GO:0005623	cell	135	Glyma.13G065400.Wm82.a4.v1Glyma.17G205900.Wm82.a4.v1Glyma.03G037009.Wm82.a4.v1Glyma.12G215000.Wm82.a4.v1Glyma.07G241600.Wm82.a4.v1Glyma.17G061800.Wm82.a4.v1Glyma.15G162600.Wm82.a4.v1Glyma.18G203300.Wm82.a4.v1Glyma.02G259100.Wm82.a4.v1Glyma.08G047500.Wm82.a4.v1Glyma.06G104600.Wm82.a4.v1Glyma.14G134100.Wm82.a4.v1Glyma.18G024600.Wm82.a4.v1Glyma.18G200500.Wm82.a4.v1Glyma.07G250600.Wm82.a4.v1Glyma.08G…
cellular component	GO:0044422	organelle part	842	Glyma.02G017200.Wm82.a4.v1Glyma.12G096900.Wm82.a4.v1Glyma.07G028900.Wm82.a4.v1Glyma.02G019400.Wm82.a4.v1Glyma.19G158351.Wm82.a4.v1Glyma.10G198500.Wm82.a4.v1Glyma.06G209800.Wm82.a4.v1Glyma.08G048567.Wm82.a4.v1Glyma.04G027100.Wm82.a4.v1Glyma.13G276300.Wm82.a4.v1Glyma.17G120700.Wm82.a4.v1Glyma.19G214100.Wm82.a4.v1Glyma.13G319000.Wm82.a4.v1Glyma.19G178100.Wm82.a4.v1Glyma.01G157100.Wm82.a4.v1Glyma.17G…
cellular component	GO:0032991	protein-containing complex	636	Glyma.05G091650.Wm82.a4.v1Glyma.01G048600.Wm82.a4.v1Glyma.19G216100.Wm82.a4.v1Glyma.10G198500.Wm82.a4.v1Glyma.04G027100.Wm82.a4.v1Glyma.13G276300.Wm82.a4.v1Glyma.09G213800.Wm82.a4.v1Glyma.08G047500.Wm82.a4.v1Glyma.12G075200.Wm82.a4.v1Glyma.19G178100.Wm82.a4.v1Glyma.02G232000.Wm82.a4.v1Glyma.10G222200.Wm82.a4.v1Glyma.08G161500.Wm82.a4.v1Glyma.02G173700.Wm82.a4.v1Glyma.10G132701.Wm82.a4.v1Glyma.06G…
cellular component	GO:0044464	cell part	4432	Glyma.06G249100.Wm82.a4.v1Glyma.02G137400.Wm82.a4.v1Glyma.02G082800.Wm82.a4.v1Glyma.02G112100.Wm82.a4.v1Glyma.14G102600.Wm82.a4.v1Glyma.19G224500.Wm82.a4.v1Glyma.10G198500.Wm82.a4.v1Glyma.01G013500.Wm82.a4.v1Glyma.02G277300.Wm82.a4.v1Glyma.06G163800.Wm82.a4.v1Glyma.17G229400.Wm82.a4.v1Glyma.02G009800.Wm82.a4.v1Glyma.04G027100.Wm82.a4.v1Glyma.05G119900.Wm82.a4.v1Glyma.05G027250.Wm82.a4.v1Glyma.08G…
				m82.a4.v1Glyma.06G167000.Wm82.a4.v1Glyma.09G047300.Wm82.a4.v1Glyma.03G055900.Wm82.a4.v1Glyma.08G100300.Wm82.a4.v1Glyma.06G136600.Wm82.a4.v1Glyma.08G135400.Wm82.a4.v1Glyma.05G138700.Wm82.a4.v1Glyma.11G215800.Wm82.a4.v1Glyma.01G063000.Wm82.a4.v1Glyma.13G123100.Wm82.a4.v1Glyma.03G128700.Wm82.a4.v1Glyma.06G067500.Wm82.a4.v1Glyma.11G092000.Wm82.a4.v1Glyma.05G222600.Wm82.a4.v1Glyma.20G153700.Wm82.a4.v1…
				G235800.Wm82.a4.v1Glyma.07G019500.Wm82.a4.v1Glyma.09G058900.Wm82.a4.v1Glyma.04G041200.Wm82.a4.v1Glyma.19G190600.Wm82.a4.v1Glyma.12G223500.Wm82.a4.v1Glyma.12G205000.Wm82.a4.v1Glyma.09G160000.Wm82.a4.v1Glyma.10G222600.Wm82.a4.v1Glyma.18G270900.Wm82.a4.v1Glyma.20G248600.Wm82.a4.v1Glyma.14G031800.Wm82.a4.v1Glyma.13G111700.Wm82.a4.v1Glyma.13G115700.Wm82.a4.v1Glyma.09G196000.Wm82.a4.v1Glyma.10G009600.W…
				a4.v1Glyma.09G276600.Wm82.a4.v1Glyma.15G276300.Wm82.a4.v1Glyma.15G118300.Wm82.a4.v1Glyma.03G069400.Wm82.a4.v1Glyma.02G013700.Wm82.a4.v1Glyma.03G048701.Wm82.a4.v1Glyma.16G028500.Wm82.a4.v1Glyma.04G241000.Wm82.a4.v1Glyma.07G022900.Wm82.a4.v1Glyma.05G038000.Wm82.a4.v1Glyma.11G171001.Wm82.a4.v1Glyma.02G000300.Wm82.a4.v1Glyma.18G271100.Wm82.a4.v1Glyma.18G259000.Wm82.a4.v1Glyma.11G005600.Wm82.a4.v1Glym…
cellular component	GO:0016020	membrane	1479	Glyma.06G163800.Wm82.a4.v1Glyma.12G096900.Wm82.a4.v1Glyma.05G109800.Wm82.a4.v1Glyma.10G109500.Wm82.a4.v1Glyma.09G199900.Wm82.a4.v1Glyma.10G132300.Wm82.a4.v1Glyma.18G199000.Wm82.a4.v1Glyma.05G024000.Wm82.a4.v1Glyma.17G113500.Wm82.a4.v1Glyma.03G085000.Wm82.a4.v1Glyma.20G212800.Wm82.a4.v1Glyma.12G163800.Wm82.a4.v1Glyma.09G136100.Wm82.a4.v1Glyma.01G013500.Wm82.a4.v1Glyma.12G191700.Wm82.a4.v1Glyma.12G…
				.v1Glyma.11G033200.Wm82.a4.v1Glyma.08G143100.Wm82.a4.v1Glyma.12G143000.Wm82.a4.v1Glyma.11G137500.Wm82.a4.v1Glyma.18G273100.Wm82.a4.v1Glyma.09G270400.Wm82.a4.v1Glyma.03G005400.Wm82.a4.v1Glyma.07G153800.Wm82.a4.v1Glyma.02G302600.Wm82.a4.v1Glyma.06G090800.Wm82.a4.v1Glyma.13G001500.Wm82.a4.v1Glyma.15G124700.Wm82.a4.v1Glyma.07G022900.Wm82.a4.v1Glyma.02G000300.Wm82.a4.v1Glyma.18G271100.Wm82.a4.v1Glyma.…
cellular component	GO:0044217	other organism part	65	Glyma.01G217400.Wm82.a4.v1Glyma.17G203400.Wm82.a4.v1Glyma.02G277600.Wm82.a4.v1Glyma.13G151200.Wm82.a4.v1Glyma.10G244000.Wm82.a4.v1Glyma.08G208000.Wm82.a4.v1Glyma.09G098400.Wm82.a4.v1Glyma.14G180300.Wm82.a4.v1Glyma.03G123600.Wm82.a4.v1Glyma.03G191100.Wm82.a4.v1Glyma.16G194400.Wm82.a4.v1Glyma.06G000600.Wm82.a4.v1Glyma.16G196200.Wm82.a4.v1Glyma.11G216400.Wm82.a4.v1Glyma.02G086500.Wm82.a4.v1Glyma.01G…
cellular component	GO:0043226	organelle	2485	Glyma.06G249100.Wm82.a4.v1Glyma.02G137400.Wm82.a4.v1Glyma.02G082800.Wm82.a4.v1Glyma.02G112100.Wm82.a4.v1Glyma.14G102600.Wm82.a4.v1Glyma.10G198500.Wm82.a4.v1Glyma.20G192300.Wm82.a4.v1Glyma.02G009800.Wm82.a4.v1Glyma.12G191900.Wm82.a4.v1Glyma.05G027250.Wm82.a4.v1Glyma.08G207900.Wm82.a4.v1Glyma.05G109800.Wm82.a4.v1Glyma.19G214100.Wm82.a4.v1Glyma.19G178100.Wm82.a4.v1Glyma.18G024600.Wm82.a4.v1Glyma.08G…
				068800.Wm82.a4.v1Glyma.11G138502.Wm82.a4.v1Glyma.02G043900.Wm82.a4.v1Glyma.11G099600.Wm82.a4.v1Glyma.04G057800.Wm82.a4.v1Glyma.12G201100.Wm82.a4.v1Glyma.15G091200.Wm82.a4.v1Glyma.02G129100.Wm82.a4.v1Glyma.01G168500.Wm82.a4.v1Glyma.06G154400.Wm82.a4.v1Glyma.12G162999.Wm82.a4.v1Glyma.05G185700.Wm82.a4.v1Glyma.13G176400.Wm82.a4.v1Glyma.17G101000.Wm82.a4.v1Glyma.13G210600.Wm82.a4.v1Glyma.04G230600.Wm…
cellular component	GO:0009295	nucleoid	12	Glyma.03G074800.Wm82.a4.v1Glyma.20G196900.Wm82.a4.v1Glyma.01G109700.Wm82.a4.v1Glyma.16G083300.Wm82.a4.v1Glyma.04G135300.Wm82.a4.v1Glyma.05G076800.Wm82.a4.v1Glyma.10G024400.Wm82.a4.v1Glyma.02G120300.Wm82.a4.v1Glyma.06G134900.Wm82.a4.v1Glyma.03G089700.Wm82.a4.v1Glyma.10G193500.Wm82.a4.v1Glyma.01G062100.Wm82.a4.v1
cellular component	GO:0099080	supramolecular complex	74	Glyma.13G030600.Wm82.a4.v1Glyma.17G094100.Wm82.a4.v1Glyma.12G218900.Wm82.a4.v1Glyma.09G149500.Wm82.a4.v1Glyma.10G045500.Wm82.a4.v1Glyma.02G015500.Wm82.a4.v1Glyma.03G197300.Wm82.a4.v1Glyma.06G023500.Wm82.a4.v1Glyma.15G256400.Wm82.a4.v1Glyma.08G344100.Wm82.a4.v1Glyma.03G240400.Wm82.a4.v1Glyma.02G302800.Wm82.a4.v1Glyma.20G207200.Wm82.a4.v1Glyma.15G252800.Wm82.a4.v1Glyma.10G154200.Wm82.a4.v1Glyma.06G…
cellular component	GO:0031974	membrane-enclosed lumen	37	Glyma.13G119800.Wm82.a4.v1Glyma.20G097700.Wm82.a4.v1Glyma.17G216700.Wm82.a4.v1Glyma.06G156000.Wm82.a4.v1Glyma.13G282800.Wm82.a4.v1Glyma.12G134400.Wm82.a4.v1Glyma.17G138500.Wm82.a4.v1Glyma.10G187300.Wm82.a4.v1Glyma.17G120700.Wm82.a4.v1Glyma.07G120400.Wm82.a4.v1Glyma.14G127500.Wm82.a4.v1Glyma.08G036400.Wm82.a4.v1Glyma.18G234533.Wm82.a4.v1Glyma.15G180900.Wm82.a4.v1Glyma.08G036300.Wm82.a4.v1Glyma.06G…
cellular component	GO:0005576	extracellular region	220	Glyma.12G022800.Wm82.a4.v1Glyma.18G055500.Wm82.a4.v1Glyma.19G224500.Wm82.a4.v1Glyma.19G213400.Wm82.a4.v1Glyma.13G353100.Wm82.a4.v1Glyma.17G163200.Wm82.a4.v1Glyma.06G195000.Wm82.a4.v1Glyma.18G249800.Wm82.a4.v1Glyma.19G150900.Wm82.a4.v1Glyma.05G236800.Wm82.a4.v1Glyma.16G028200.Wm82.a4.v1Glyma.17G260400.Wm82.a4.v1Glyma.18G207700.Wm82.a4.v1Glyma.20G171900.Wm82.a4.v1Glyma.12G195500.Wm82.a4.v1Glyma.08G…
cellular component	GO:0044421	extracellular region part	34	Glyma.02G204700.Wm82.a4.v1Glyma.20G164900.Wm82.a4.v1Glyma.06G036300.Wm82.a4.v1Glyma.16G143300.Wm82.a4.v1Glyma.16G095900.Wm82.a4.v1Glyma.05G152200.Wm82.a4.v1Glyma.08G292300.Wm82.a4.v1Glyma.02G028300.Wm82.a4.v1Glyma.02G028700.Wm82.a4.v1Glyma.02G028800.Wm82.a4.v1Glyma.08G116900.Wm82.a4.v1Glyma.01G037200.Wm82.a4.v1Glyma.13G094200.Wm82.a4.v1Glyma.11G161320.Wm82.a4.v1Glyma.14G216300.Wm82.a4.v1Glyma.06G…
cellular component	GO:0030054	cell junction	117	Glyma.12G148200.Wm82.a4.v1Glyma.12G022800.Wm82.a4.v1Glyma.09G156700.Wm82.a4.v1Glyma.05G235200.Wm82.a4.v1Glyma.07G049300.Wm82.a4.v1Glyma.12G195500.Wm82.a4.v1Glyma.12G235900.Wm82.a4.v1Glyma.18G271300.Wm82.a4.v1Glyma.03G201550.Wm82.a4.v1Glyma.03G247800.Wm82.a4.v1Glyma.15G114400.Wm82.a4.v1Glyma.05G024650.Wm82.a4.v1Glyma.07G260300.Wm82.a4.v1Glyma.18G272700.Wm82.a4.v1Glyma.05G151400.Wm82.a4.v1Glyma.03G…
molecular function	GO:0031386	protein tag	7	Glyma.13G176400.Wm82.a4.v1Glyma.13G176100.Wm82.a4.v1Glyma.07G199900.Wm82.a4.v1Glyma.10G051100.Wm82.a4.v1Glyma.17G042200.Wm82.a4.v1Glyma.13G117700.Wm82.a4.v1Glyma.13G138600.Wm82.a4.v1
molecular function	GO:0005215	transporter activity	653	Glyma.09G050600.Wm82.a4.v1Glyma.01G033800.Wm82.a4.v1Glyma.17G096400.Wm82.a4.v1Glyma.08G059700.Wm82.a4.v1Glyma.15G071800.Wm82.a4.v1Glyma.16G088300.Wm82.a4.v1Glyma.17G234152.Wm82.a4.v1Glyma.01G041400.Wm82.a4.v1Glyma.19G239000.Wm82.a4.v1Glyma.07G022500.Wm82.a4.v1Glyma.05G109800.Wm82.a4.v1Glyma.08G047500.Wm82.a4.v1Glyma.04G097500.Wm82.a4.v1Glyma.01G157100.Wm82.a4.v1Glyma.10G132300.Wm82.a4.v1Glyma.08G…
molecular function	GO:0005488	binding	4831	Glyma.06G249100.Wm82.a4.v1Glyma.02G137400.Wm82.a4.v1Glyma.02G082800.Wm82.a4.v1Glyma.12G068000.Wm82.a4.v1Glyma.02G112100.Wm82.a4.v1Glyma.07G241600.Wm82.a4.v1Glyma.10G198500.Wm82.a4.v1Glyma.01G013500.Wm82.a4.v1Glyma.20G192300.Wm82.a4.v1Glyma.06G163800.Wm82.a4.v1Glyma.02G125100.Wm82.a4.v1Glyma.04G027100.Wm82.a4.v1Glyma.16G032200.Wm82.a4.v1Glyma.05G027250.Wm82.a4.v1Glyma.05G161400.Wm82.a4.v1Glyma.19G…
				m82.a4.v1Glyma.07G048500.Wm82.a4.v1Glyma.03G177300.Wm82.a4.v1Glyma.08G146500.Wm82.a4.v1Glyma.19G140800.Wm82.a4.v1Glyma.04G126500.Wm82.a4.v1Glyma.01G242500.Wm82.a4.v1Glyma.05G110400.Wm82.a4.v1Glyma.13G199800.Wm82.a4.v1Glyma.20G101100.Wm82.a4.v1Glyma.16G196200.Wm82.a4.v1Glyma.11G243800.Wm82.a4.v1Glyma.16G047100.Wm82.a4.v1Glyma.01G124700.Wm82.a4.v1Glyma.12G079202.Wm82.a4.v1Glyma.06G295700.Wm82.a4.v1…
				G062100.Wm82.a4.v1Glyma.20G209700.Wm82.a4.v1Glyma.03G054900.Wm82.a4.v1Glyma.02G276300.Wm82.a4.v1Glyma.19G190200.Wm82.a4.v1Glyma.15G168800.Wm82.a4.v1Glyma.15G146700.Wm82.a4.v1Glyma.01G005100.Wm82.a4.v1Glyma.18G005800.Wm82.a4.v1Glyma.03G048600.Wm82.a4.v1Glyma.08G355200.Wm82.a4.v1Glyma.18G007700.Wm82.a4.v1Glyma.19G054700.Wm82.a4.v1Glyma.20G155100.Wm82.a4.v1Glyma.05G119100.Wm82.a4.v1Glyma.02G302400.W…
				a4.v1Glyma.15G024200.Wm82.a4.v1Glyma.07G048300.Wm82.a4.v1Glyma.16G172600.Wm82.a4.v1Glyma.12G097100.Wm82.a4.v1Glyma.08G137000.Wm82.a4.v1Glyma.13G130200.Wm82.a4.v1Glyma.15G203600.Wm82.a4.v1Glyma.19G258100.Wm82.a4.v1Glyma.08G022900.Wm82.a4.v1Glyma.14G061200.Wm82.a4.v1Glyma.18G258400.Wm82.a4.v1Glyma.01G041600.Wm82.a4.v1Glyma.12G172250.Wm82.a4.v1Glyma.05G173000.Wm82.a4.v1Glyma.01G222300.Wm82.a4.v1Glym…
molecular function	GO:0003824	catalytic activity	4625	Glyma.04G189200.Wm82.a4.v1Glyma.13G372000.Wm82.a4.v1Glyma.07G241600.Wm82.a4.v1Glyma.19G224500.Wm82.a4.v1Glyma.04G087500.Wm82.a4.v1Glyma.17G156300.Wm82.a4.v1Glyma.01G013500.Wm82.a4.v1Glyma.02G125100.Wm82.a4.v1Glyma.12G191900.Wm82.a4.v1Glyma.05G119900.Wm82.a4.v1Glyma.09G172100.Wm82.a4.v1Glyma.15G078800.Wm82.a4.v1Glyma.12G096900.Wm82.a4.v1Glyma.14G062600.Wm82.a4.v1Glyma.19G214100.Wm82.a4.v1Glyma.13G…
				165300.Wm82.a4.v1Glyma.16G119900.Wm82.a4.v1Glyma.07G269400.Wm82.a4.v1Glyma.07G179900.Wm82.a4.v1Glyma.01G186600.Wm82.a4.v1Glyma.10G186000.Wm82.a4.v1Glyma.01G070400.Wm82.a4.v1Glyma.05G075000.Wm82.a4.v1Glyma.06G005700.Wm82.a4.v1Glyma.09G077100.Wm82.a4.v1Glyma.06G307100.Wm82.a4.v1Glyma.05G122700.Wm82.a4.v1Glyma.08G146500.Wm82.a4.v1Glyma.19G140800.Wm82.a4.v1Glyma.17G143800.Wm82.a4.v1Glyma.02G287600.Wm…
				4.v1Glyma.08G312000.Wm82.a4.v1Glyma.20G076300.Wm82.a4.v1Glyma.06G106500.Wm82.a4.v1Glyma.17G262300.Wm82.a4.v1Glyma.08G282900.Wm82.a4.v1Glyma.01G124500.Wm82.a4.v1Glyma.09G115300.Wm82.a4.v1Glyma.06G017600.Wm82.a4.v1Glyma.17G071600.Wm82.a4.v1Glyma.14G074700.Wm82.a4.v1Glyma.05G085400.Wm82.a4.v1Glyma.20G162600.Wm82.a4.v1Glyma.17G120833.Wm82.a4.v1Glyma.10G013300.Wm82.a4.v1Glyma.02G028600.Wm82.a4.v1Glyma…
				.Wm82.a4.v1Glyma.03G226800.Wm82.a4.v1Glyma.11G152200.Wm82.a4.v1Glyma.17G020700.Wm82.a4.v1Glyma.17G010600.Wm82.a4.v1Glyma.17G121600.Wm82.a4.v1Glyma.08G065800.Wm82.a4.v1Glyma.19G235300.Wm82.a4.v1Glyma.09G240100.Wm82.a4.v1Glyma.14G224000.Wm82.a4.v1Glyma.17G235000.Wm82.a4.v1Glyma.06G307600.Wm82.a4.v1Glyma.18G055500.Wm82.a4.v1Glyma.U031127.Wm82.a4.v1Glyma.15G136700.Wm82.a4.v1Glyma.11G085300.Wm82.a4.v1…
molecular function	GO:0140104	molecular carrier activity	3	Glyma.06G211300.Wm82.a4.v1Glyma.04G151600.Wm82.a4.v1Glyma.18G011900.Wm82.a4.v1
molecular function	GO:0005198	structural molecule activity	67	Glyma.02G083702.Wm82.a4.v1Glyma.03G195800.Wm82.a4.v1Glyma.01G048600.Wm82.a4.v1Glyma.20G033000.Wm82.a4.v1Glyma.13G276300.Wm82.a4.v1Glyma.13G000900.Wm82.a4.v1Glyma.14G030000.Wm82.a4.v1Glyma.03G099400.Wm82.a4.v1Glyma.15G277200.Wm82.a4.v1Glyma.18G050600.Wm82.a4.v1Glyma.06G325566.Wm82.a4.v1Glyma.04G088500.Wm82.a4.v1Glyma.04G171700.Wm82.a4.v1Glyma.12G085800.Wm82.a4.v1Glyma.17G178001.Wm82.a4.v1Glyma.01G…
molecular function	GO:0098772	molecular function regulator	194	Glyma.08G039600.Wm82.a4.v1Glyma.20G205700.Wm82.a4.v1Glyma.05G149800.Wm82.a4.v1Glyma.08G342051.Wm82.a4.v1Glyma.16G212400.Wm82.a4.v1Glyma.09G155500.Wm82.a4.v1Glyma.06G051800.Wm82.a4.v1Glyma.14G038500.Wm82.a4.v1Glyma.20G211700.Wm82.a4.v1Glyma.11G225200.Wm82.a4.v1Glyma.13G357400.Wm82.a4.v1Glyma.15G015900.Wm82.a4.v1Glyma.16G014000.Wm82.a4.v1Glyma.07G181700.Wm82.a4.v1Glyma.07G243500.Wm82.a4.v1Glyma.07G…
molecular function	GO:0045735	nutrient reservoir activity	18	Glyma.13G123500.Wm82.a4.v1Glyma.06G153900.Wm82.a4.v1Glyma.11G153587.Wm82.a4.v1Glyma.05G169100.Wm82.a4.v1Glyma.07G014600.Wm82.a4.v1Glyma.17G049800.Wm82.a4.v1Glyma.10G246500.Wm82.a4.v1Glyma.03G239700.Wm82.a4.v1Glyma.07G014500.Wm82.a4.v1Glyma.10G246300.Wm82.a4.v1Glyma.08G200200.Wm82.a4.v1Glyma.20G146200.Wm82.a4.v1Glyma.03G163533.Wm82.a4.v1Glyma.16G070200.Wm82.a4.v1Glyma.08G200100.Wm82.a4.v1Glyma.06G…
molecular function	GO:0016209	antioxidant activity	78	Glyma.05G207200.Wm82.a4.v1Glyma.11G161600.Wm82.a4.v1Glyma.14G056300.Wm82.a4.v1Glyma.20G196900.Wm82.a4.v1Glyma.07G260300.Wm82.a4.v1Glyma.18G055500.Wm82.a4.v1Glyma.11G024100.Wm82.a4.v1Glyma.15G052600.Wm82.a4.v1Glyma.01G219502.Wm82.a4.v1Glyma.18G203300.Wm82.a4.v1Glyma.10G198100.Wm82.a4.v1Glyma.20G241800.Wm82.a4.v1Glyma.10G009600.Wm82.a4.v1Glyma.19G233900.Wm82.a4.v1Glyma.08G168000.Wm82.a4.v1Glyma.02G…
molecular function	GO:0045182	translation regulator activity	49	Glyma.11G228000.Wm82.a4.v1Glyma.03G150600.Wm82.a4.v1Glyma.17G216700.Wm82.a4.v1Glyma.09G275100.Wm82.a4.v1Glyma.11G041400.Wm82.a4.v1Glyma.04G126400.Wm82.a4.v1Glyma.15G252800.Wm82.a4.v1Glyma.06G176900.Wm82.a4.v1Glyma.08G043800.Wm82.a4.v1Glyma.13G240100.Wm82.a4.v1Glyma.05G052900.Wm82.a4.v1Glyma.02G255000.Wm82.a4.v1Glyma.18G031100.Wm82.a4.v1Glyma.15G011200.Wm82.a4.v1Glyma.18G214000.Wm82.a4.v1Glyma.14G…
molecular function	GO:0060089	molecular transducer activity	202	Glyma.14G224000.Wm82.a4.v1Glyma.20G087000.Wm82.a4.v1Glyma.12G099500.Wm82.a4.v1Glyma.08G198500.Wm82.a4.v1Glyma.06G051800.Wm82.a4.v1Glyma.03G149000.Wm82.a4.v1Glyma.15G004700.Wm82.a4.v1Glyma.16G047100.Wm82.a4.v1Glyma.04G165600.Wm82.a4.v1Glyma.09G000166.Wm82.a4.v1Glyma.13G032600.Wm82.a4.v1Glyma.18G282100.Wm82.a4.v1Glyma.17G030200.Wm82.a4.v1Glyma.06G296800.Wm82.a4.v1Glyma.19G005900.Wm82.a4.v1Glyma.06G…
molecular function	GO:0140110	transcription regulator activity	561	Glyma.01G217400.Wm82.a4.v1Glyma.02G137400.Wm82.a4.v1Glyma.02G082800.Wm82.a4.v1Glyma.11G246400.Wm82.a4.v1Glyma.02G112100.Wm82.a4.v1Glyma.13G075000.Wm82.a4.v1Glyma.10G164100.Wm82.a4.v1Glyma.13G112400.Wm82.a4.v1Glyma.11G096000.Wm82.a4.v1Glyma.01G087500.Wm82.a4.v1Glyma.06G125100.Wm82.a4.v1Glyma.17G197500.Wm82.a4.v1Glyma.10G204400.Wm82.a4.v1Glyma.20G209700.Wm82.a4.v1Glyma.12G231400.Wm82.a4.v1Glyma.12G…
molecular function	GO:0140299	small molecule sensor activity	14	Glyma.07G173700.Wm82.a4.v1Glyma.05G241600.Wm82.a4.v1Glyma.10G188500.Wm82.a4.v1Glyma.02G087000.Wm82.a4.v1Glyma.18G068250.Wm82.a4.v1Glyma.20G202200.Wm82.a4.v1Glyma.12G241700.Wm82.a4.v1Glyma.16G125100.Wm82.a4.v1Glyma.02G046600.Wm82.a4.v1Glyma.19G213300.Wm82.a4.v1Glyma.03G219033.Wm82.a4.v1Glyma.08G047500.Wm82.a4.v1Glyma.20G087000.Wm82.a4.v1Glyma.15G196500.Wm82.a4.v1
molecular function	GO:0044183	protein folding chaperone	15	Glyma.13G167200.Wm82.a4.v1Glyma.07G170800.Wm82.a4.v1Glyma.18G116601.Wm82.a4.v1Glyma.02G093200.Wm82.a4.v1Glyma.05G219600.Wm82.a4.v1Glyma.18G289600.Wm82.a4.v1Glyma.02G085600.Wm82.a4.v1Glyma.18G287800.Wm82.a4.v1Glyma.02G205600.Wm82.a4.v1Glyma.11G140500.Wm82.a4.v1Glyma.12G064000.Wm82.a4.v1Glyma.17G072400.Wm82.a4.v1Glyma.08G025900.Wm82.a4.v1Glyma.18G289100.Wm82.a4.v1Glyma.13G224000.Wm82.a4.v1

## Sheet: Table S4
Table S4 Information of 2,256 DEGs in 8 modules related to SC15 resistance.
Gene ID	Description	Module	P value	Correlation coefficient between module and phenotype (R)
Glyma.08G202000.Wm82.a4.v1	(1 of 4) PTHR24326:SF217 - HOMEOBOX-LEUCINE ZIPPER PROTEIN ATHB-15	magenta	0	0.866
Glyma.15G213700.Wm82.a4.v1	(1 of 5) PF01453//PF07714//PF08276 - D-mannose binding lectin (B_lectin) // Protein tyrosine kinase (Pkinase_Tyr) // PAN-like domain (PAN_2)
Glyma.07G156901.Wm82.a4.v1	-
Glyma.03G057800.Wm82.a4.v1	(1 of 4) PTHR12231:SF111 - MATRIX-REMODELING-ASSOCIATED PROTEIN 8
Glyma.11G136900.Wm82.a4.v1	(1 of 7) PTHR24350 - SERINE/THREONINE-PROTEIN KINASE IAL-RELATED
Glyma.08G201900.Wm82.a4.v1	(1 of 4) PTHR24326:SF217 - HOMEOBOX-LEUCINE ZIPPER PROTEIN ATHB-15
Glyma.20G165000.Wm82.a4.v1	(1 of 5) K05666 - ATP-binding cassette, subfamily C (CFTR/MRP), member 2 (ABCC2)
Glyma.14G089093.Wm82.a4.v1	(1 of 5) PTHR31602:SF2 - GROWTH-REGULATING FACTOR 1-RELATED
Glyma.18G109000.Wm82.a4.v1	-
Glyma.13G032700.Wm82.a4.v1	(1 of 73) 3.1.4.46 - Glycerophosphodiester phosphodiesterase / Glycerophosphoryl diester phosphodiesterase
Glyma.03G000167.Wm82.a4.v1	(1 of 4) PTHR24186//PTHR24186:SF8 - FAMILY NOT NAMED // ANKYRIN REPEATS-CONTAINING PROTEIN
Glyma.17G161900.Wm82.a4.v1	(1 of 1) 3.5.1.49 - Formamidase / Formamide amidohydrolase
Glyma.18G271100.Wm82.a4.v1	(1 of 35) PF07714//PF11721 - Protein tyrosine kinase (Pkinase_Tyr) // Di-glucose binding within endoplasmic reticulum (Malectin)
Glyma.13G086700.Wm82.a4.v1	(1 of 3) PTHR10283//PTHR10283:SF106 - SOLUTE CARRIER FAMILY 13 MEMBER // SUBFAMILY NOT NAMED
Glyma.16G075200.Wm82.a4.v1	(1 of 1) PF13416 - Bacterial extracellular solute-binding protein (SBP_bac_8)
Glyma.18G255200.Wm82.a4.v1	(1 of 6) PTHR10438//PTHR10438:SF243 - THIOREDOXIN // THIOREDOXIN H2
Glyma.18G272600.Wm82.a4.v1	(1 of 2227) 2.7.11.1 - Non-specific serine/threonine protein kinase / Threonine-specific protein kinase
Glyma.15G222900.Wm82.a4.v1	-
Glyma.12G021200.Wm82.a4.v1	-
Glyma.02G028300.Wm82.a4.v1	(1 of 4) 3.4.24.34 - Neutrophil collagenase / Matrix metalloproteinase 8
Glyma.03G163000.Wm82.a4.v1	(1 of 11) KOG4249 - Uncharacterized conserved protein
Glyma.02G028100.Wm82.a4.v1	(1 of 6) 3.4.24.7 - Interstitial collagenase / Vertebrate collagenase
Glyma.04G022620.Wm82.a4.v1	(1 of 10) PTHR12174:SF41 - SIGNAL PEPTIDE PEPTIDASE-LIKE 4
Glyma.20G192300.Wm82.a4.v1	(1 of 2) PTHR31989//PTHR31989:SF43 - FAMILY NOT NAMED // NAC DOMAIN CONTAINING PROTEIN 53-RELATED
Glyma.16G091002.Wm82.a4.v1	(1 of 5) 6.1.1.12 - Aspartate--tRNA ligase / Aspartyl-tRNA synthetase
Glyma.17G203751.Wm82.a4.v1	(1 of 2) PF01903 - CbiX (CbiX)
Glyma.07G016500.Wm82.a4.v1	(1 of 4) PTHR24326:SF217 - HOMEOBOX-LEUCINE ZIPPER PROTEIN ATHB-15
Glyma.17G173200.Wm82.a4.v1	(1 of 10) 1.1.1.219 - Dihydrokaempferol 4-reductase / NADPH-dihydromyricetin reductase
Glyma.06G243500.Wm82.a4.v1	(1 of 6) K14506 - jasmonic acid-amino synthetase (JAR1)
Glyma.11G180700.Wm82.a4.v1	(1 of 3) PTHR27001//PTHR27001:SF224 - FAMILY NOT NAMED // SOMATIC EMBRYOGENESIS RECEPTOR KINASE 1
Glyma.03G107500.Wm82.a4.v1	(1 of 3) PTHR24015:SF817 - EXPRESSED PROTEIN-RELATED
Glyma.07G027751.Wm82.a4.v1	(1 of 7) PTHR33137:SF4 - F7H2.13 PROTEIN-RELATED
Glyma.16G136400.Wm82.a4.v1	(1 of 6) PTHR12308 - NGEP-RELATED
Glyma.18G110800.Wm82.a4.v1	(1 of 18) PTHR11206:SF87 - MATE EFFLUX FAMILY PROTEIN-RELATED
Glyma.02G069400.Wm82.a4.v1	(1 of 1) PF07714//PF11820 - Protein tyrosine kinase (Pkinase_Tyr) // Protein of unknown function (DUF3339) (DUF3339)
Glyma.15G209900.Wm82.a4.v1	(1 of 185) 3.6.4.13 - RNA helicase
Glyma.17G178700.Wm82.a4.v1	(1 of 5) PTHR11200:SF128 - TYPE I INOSITOL 1,4,5-TRISPHOSPHATE 5-PHOSPHATASE 1
Glyma.15G115300.Wm82.a4.v1	(1 of 20) PTHR11413 - CYSTATIN FAMILY MEMBER
Glyma.13G053766.Wm82.a4.v1	(1 of 6) PTHR27003:SF81 - U-BOX DOMAIN-CONTAINING PROTEIN 50-RELATED
Glyma.15G213600.Wm82.a4.v1	(1 of 4) PF01453//PF07714 - D-mannose binding lectin (B_lectin) // Protein tyrosine kinase (Pkinase_Tyr)
Glyma.02G004200.Wm82.a4.v1	(1 of 4) PTHR31008:SF0 - COP1-INTERACTING PROTEIN-LIKE PROTEIN
Glyma.02G028800.Wm82.a4.v1	(1 of 4) 3.4.24.34 - Neutrophil collagenase / Matrix metalloproteinase 8
Glyma.02G125100.Wm82.a4.v1	(1 of 16) 1.14.11.31 - Thebaine 6-O-demethylase
Glyma.03G165200.Wm82.a4.v1	(1 of 9) 1.1.3.20 - Long-chain-alcohol oxidase
Glyma.03G179000.Wm82.a4.v1	(1 of 1) PTHR35298//PTHR35298:SF1 - FAMILY NOT NAMED // DNA-BINDING PROTEIN S1FA1-RELATED
Glyma.03G238400.Wm82.a4.v1	(1 of 6) KOG3114 - Uncharacterized conserved protein
Glyma.04G062700.Wm82.a4.v1	(1 of 4) PTHR12378//PTHR12378:SF12 - UNCHARACTERIZED // EXPRESSED PROTEIN
Glyma.04G124800.Wm82.a4.v1	(1 of 9) KOG2615 - Permease of the major facilitator superfamily
Glyma.06G156700.Wm82.a4.v1	(1 of 6) PTHR22950//PTHR22950:SF310 - AMINO ACID TRANSPORTER // SUBFAMILY NOT NAMED
Glyma.07G089800.Wm82.a4.v1	(1 of 1) 1.1.1.314//1.14.13.123 - Germacrene A alcohol dehydrogenase // Germacrene A hydroxylase
Glyma.07G140200.Wm82.a4.v1	(1 of 11) PTHR11260//PTHR11260:SF314 - GLUTATHIONE S-TRANSFERASE, GST, SUPERFAMILY, GST DOMAIN CONTAINING // SUBFAMILY NOT NAMED
Glyma.08G109700.Wm82.a4.v1	(1 of 4) PTHR24078//PTHR24078:SF222 - DNAJ HOMOLOG SUBFAMILY C MEMBER // SUBFAMILY NOT NAMED
Glyma.08G123200.Wm82.a4.v1	(1 of 3) K01724 - 4a-hydroxytetrahydrobiopterin dehydratase [EC:4.2.1.96] (PCBD, phhB)
Glyma.09G035300.Wm82.a4.v1	(1 of 4) KOG3450 - Huntingtin interacting protein HYPK
Glyma.09G285100.Wm82.a4.v1	(1 of 5) PTHR19321//PTHR19321:SF5 - PROTEIN REGULATOR OF CYTOKINESIS 1 PRC1-RELATED // 65-KDA MICROTUBULE-ASSOCIATED PROTEIN 6-RELATED
Glyma.11G137000.Wm82.a4.v1	(1 of 6) PTHR12537//PTHR12537:SF78 - RNA BINDING PROTEIN PUMILIO-RELATED // PUMILIO HOMOLOG 1-RELATED
Glyma.12G173300.Wm82.a4.v1	(1 of 8) PTHR23012//PTHR23012:SF25 - MEMBRANE ASSOCIATED RING FINGER // RING/U-BOX DOMAIN-CONTAINING PROTEIN
Glyma.13G048200.Wm82.a4.v1	(1 of 7) PTHR10209:SF108 - 2-OXOGLUTARATE (2OG) AND FE(II)-DEPENDENT OXYGENASE-LIKE PROTEIN
Glyma.13G053700.Wm82.a4.v1	(1 of 35) PF07714//PF11721 - Protein tyrosine kinase (Pkinase_Tyr) // Di-glucose binding within endoplasmic reticulum (Malectin)
Glyma.13G272900.Wm82.a4.v1	(1 of 2) 1.3.1.27 - 2-hexadecenal reductase / 2-alkenal reductase
Glyma.13G274800.Wm82.a4.v1	(1 of 4) PTHR13832:SF333 - PROTEIN PHOSPHATASE 2C 39-RELATED
Glyma.13G302166.Wm82.a4.v1	(1 of 5) PTHR11255//PTHR11255:SF29 - DIACYLGLYCEROL KINASE // DIACYLGLYCEROL KINASE 5-RELATED
Glyma.14G083100.Wm82.a4.v1	(1 of 2) PTHR24356:SF195 - PROTEIN KINASE FAMILY PROTEIN
Glyma.14G178800.Wm82.a4.v1	(1 of 2) PTHR24078:SF247 - CHAPERONE PROTEIN DNAJ 1, MITOCHONDRIAL
Glyma.16G065500.Wm82.a4.v1	(1 of 38) PF08263//PF13855 - Leucine rich repeat N-terminal domain (LRRNT_2) // Leucine rich repeat (LRR_8)
Glyma.18G048300.Wm82.a4.v1	(1 of 1) 1.14.11.19//1.14.11.9 - Leucocyanidin oxygenase / Leucoanthocyanidin dioxygenase // Flavanone 3-dioxygenase / Naringenin,2-oxoglutarate:oxygen oxidoreductase (3-hydroxylating)
Glyma.18G283900.Wm82.a4.v1	(1 of 1) K15363 - fanconi-associated nuclease 1 (FAN1, MTMR15)
Glyma.20G139700.Wm82.a4.v1	(1 of 51) PF01657//PF07714 - Salt stress response/antifungal (Stress-antifung) // Protein tyrosine kinase (Pkinase_Tyr)
Glyma.U008900.Wm82.a4.v1	(1 of 18) PTHR23155//PTHR23155:SF402 - LEUCINE-RICH REPEAT-CONTAINING PROTEIN // DISEASE RESISTANCE PROTEIN RPP13-RELATED
Glyma.02G002200.Wm82.a4.v1	-
Glyma.02G042700.Wm82.a4.v1	(1 of 60) PF03087 - Arabidopsis protein of unknown function (DUF241)
Glyma.03G005650.Wm82.a4.v1	(1 of 10) 1.13.11.51 - 9-cis-epoxycarotenoid dioxygenase / VP14
Glyma.03G037009.Wm82.a4.v1	-
Glyma.03G089700.Wm82.a4.v1	-
Glyma.03G248400.Wm82.a4.v1	(1 of 15) 1.1.1.317 - Perakine reductase
Glyma.03G250300.Wm82.a4.v1	(1 of 4) PTHR13132//PTHR13132:SF29 - ALPHA- 1,6 -FUCOSYLTRANSFERASE // ALPHA-(1,6)-FUCOSYLTRANSFERASE
Glyma.04G153000.Wm82.a4.v1	-
Glyma.06G267300.Wm82.a4.v1	(1 of 1) PF13191//PF13676 - AAA ATPase domain (AAA_16) // TIR domain (TIR_2)
Glyma.07G081000.Wm82.a4.v1	(1 of 92) PF00664 - ABC transporter transmembrane region (ABC_membrane)
Glyma.07G167700.Wm82.a4.v1	(1 of 6) 1.1.1.334 - Methylecgonone reductase
Glyma.07G202300.Wm82.a4.v1	(1 of 3) K13257 - 2-hydroxyisoflavanone synthase (CYP93C)
Glyma.09G284500.Wm82.a4.v1	(1 of 7) PTHR31072//PTHR31072:SF7 - FAMILY NOT NAMED // TRANSCRIPTION FACTOR TCP21-RELATED
Glyma.15G199300.Wm82.a4.v1	-
Glyma.15G209200.Wm82.a4.v1	(1 of 42) KOG0617 - Ras suppressor protein (contains leucine-rich repeats)
Glyma.15G223000.Wm82.a4.v1	-
Glyma.15G257500.Wm82.a4.v1	(1 of 22) 1.14.11.20 - Deacetoxyvindoline 4-hydroxylase / Desacetyoxyvindoline-17-hydroxylase
Glyma.15G257600.Wm82.a4.v1	(1 of 22) 1.14.11.20 - Deacetoxyvindoline 4-hydroxylase / Desacetyoxyvindoline-17-hydroxylase
Glyma.15G272600.Wm82.a4.v1	-
Glyma.17G171502.Wm82.a4.v1	(1 of 8) PTHR31339:SF17 - ENDO-POLYGALACTURONASE-LIKE PROTEIN-RELATED
Glyma.18G044300.Wm82.a4.v1	(1 of 2) PTHR24198//PTHR24198:SF94 - ANKYRIN REPEAT AND PROTEIN KINASE DOMAIN-CONTAINING PROTEIN // ANKYRIN REPEAT DOMAIN-CONTAINING PROTEIN EMB506, CHLOROPLASTIC
Glyma.18G227000.Wm82.a4.v1	-
Glyma.18G271000.Wm82.a4.v1	(1 of 17) PF07714//PF12819 - Protein tyrosine kinase (Pkinase_Tyr) // Carbohydrate-binding protein of the ER (Malectin_like)
Glyma.19G204600.Wm82.a4.v1	(1 of 4) PTHR31300//PTHR31300:SF3 - FAMILY NOT NAMED // GB|AAD30234.1
Glyma.20G028300.Wm82.a4.v1	(1 of 90) PF12776 - Myb/SANT-like DNA-binding domain (Myb_DNA-bind_3)
Glyma.20G064301.Wm82.a4.v1	-
Glyma.20G069000.Wm82.a4.v1	(1 of 74) PTHR23273 - REPLICATION FACTOR A 1, RFA1
Glyma.U031127.Wm82.a4.v1	(1 of 14) PF00069//PF00560//PF07714//PF08263//PF13855 - Protein kinase domain (Pkinase) // Leucine Rich Repeat (LRR_1) // Protein tyrosine kinase (Pkinase_Tyr) // Leucine rich repeat N-terminal domain (LRRNT_2) // Leucine rich repeat (LRR_8)
Glyma.01G030300.Wm82.a4.v1	(1 of 25) PF07816 - Protein of unknown function (DUF1645) (DUF1645)	greenyellow	0	0.696
Glyma.03G055900.Wm82.a4.v1	(1 of 2) 3.5.4.17 - Adenosine-phosphate deaminase
Glyma.03G247100.Wm82.a4.v1	(1 of 2) PTHR22952//PTHR22952:SF197 - CAMP-RESPONSE ELEMENT BINDING PROTEIN-RELATED // SUBFAMILY NOT NAMED
Glyma.04G044900.Wm82.a4.v1	(1 of 86) PF13912 - C2H2-type zinc finger (zf-C2H2_6)
Glyma.04G092100.Wm82.a4.v1	(1 of 6) K15104 - solute carrier family 25 (mitochondrial oxoglutarate transporter), member 11 (SLC25A11, OGC)
Glyma.05G010500.Wm82.a4.v1	-
Glyma.05G225900.Wm82.a4.v1	(1 of 4) PTHR33172:SF2 - EMB|CAB83157.1
Glyma.06G045400.Wm82.a4.v1	(1 of 86) PF13912 - C2H2-type zinc finger (zf-C2H2_6)
Glyma.06G102000.Wm82.a4.v1	(1 of 7) PTHR31279//PTHR31279:SF3 - FAMILY NOT NAMED // (PHI-1) PROTEIN, PUTATIVE-RELATED
Glyma.06G135900.Wm82.a4.v1	-
Glyma.07G168900.Wm82.a4.v1	(1 of 7) PF07676 - WD40-like Beta Propeller Repeat (PD40)
Glyma.07G172000.Wm82.a4.v1	(1 of 5) PTHR10788:SF48 - ALPHA,ALPHA-TREHALOSE-PHOSPHATE SYNTHASE [UDP-FORMING] 6
Glyma.07G179400.Wm82.a4.v1	-
Glyma.09G072000.Wm82.a4.v1	(1 of 8) PTHR31985:SF34 - ETHYLENE-RESPONSIVE TRANSCRIPTION FACTOR ERF018
Glyma.09G274000.Wm82.a4.v1	(1 of 176) PF03106 - WRKY DNA -binding domain (WRKY)
Glyma.11G039400.Wm82.a4.v1	(1 of 10) K01177 - beta-amylase (E3.2.1.2)
Glyma.12G030100.Wm82.a4.v1	(1 of 18) KOG2922 - Uncharacterized conserved protein
Glyma.12G119200.Wm82.a4.v1	(1 of 4) PTHR10168//PTHR10168:SF111 - GLUTAREDOXIN // MONOTHIOL GLUTAREDOXIN-S13
Glyma.12G200500.Wm82.a4.v1	(1 of 36) PF12609 - Wound-induced protein (DUF3774)
Glyma.13G211300.Wm82.a4.v1	(1 of 7) K06890 - uncharacterized protein (K06890)
Glyma.13G283600.Wm82.a4.v1	(1 of 6) PTHR23050//PTHR23050:SF170 - CALCIUM BINDING PROTEIN // SUBFAMILY NOT NAMED
Glyma.14G073200.Wm82.a4.v1	-
Glyma.14G205600.Wm82.a4.v1	(1 of 4) PTHR31194//PTHR31194:SF6 - SHN SHINE , DNA BINDING / TRANSCRIPTION FACTOR // SUBFAMILY NOT NAMED
Glyma.14G223400.Wm82.a4.v1	(1 of 1) PTHR24413:SF79 - BTB/POZ DOMAIN-CONTAINING PROTEIN 9
Glyma.15G166500.Wm82.a4.v1	-
Glyma.16G085600.Wm82.a4.v1	(1 of 2) PTHR31579//PTHR31579:SF4 - FAMILY NOT NAMED // F21O3.6 PROTEIN-RELATED
Glyma.17G111400.Wm82.a4.v1	(1 of 2) PTHR31268:SF5 - GALACTINOL--SUCROSE GALACTOSYLTRANSFERASE 6-RELATED
Glyma.17G118200.Wm82.a4.v1	-
Glyma.19G132900.Wm82.a4.v1	(1 of 4) K14674 - TAG lipase / steryl ester hydrolase / phospholipase A2 / LPA acyltransferase (TGL4)
Glyma.19G200200.Wm82.a4.v1	(1 of 6) PTHR22849:SF38 - E3 UBIQUITIN-PROTEIN LIGASE PUB22-RELATED
Glyma.19G244800.Wm82.a4.v1	(1 of 2) PTHR22952//PTHR22952:SF197 - CAMP-RESPONSE ELEMENT BINDING PROTEIN-RELATED // SUBFAMILY NOT NAMED
Glyma.02G274400.Wm82.a4.v1	(1 of 2) PTHR31852:SF0 - LATE EMBRYOGENESIS ABUNDANT HYDROXYPROLINE-RICH GLYCOPROTEIN
Glyma.03G173300.Wm82.a4.v1	(1 of 12) PTHR26374//PTHR26374:SF198 - FAMILY NOT NAMED // ZINC FINGER PROTEIN ZAT11
Glyma.04G179500.Wm82.a4.v1	(1 of 9) PTHR23201//PTHR23201:SF18 - EXTENSIN, PROLINE-RICH PROTEIN // SUBFAMILY NOT NAMED
Glyma.04G180800.Wm82.a4.v1	-
Glyma.04G228800.Wm82.a4.v1	-
Glyma.05G180100.Wm82.a4.v1	(1 of 1) PTHR10909:SF317 - ACYL-COENZYME A OXIDASE 2, PEROXISOMAL
Glyma.06G184300.Wm82.a4.v1	-
Glyma.06G290000.Wm82.a4.v1	(1 of 349) PF00847 - AP2 domain (AP2)
Glyma.08G158100.Wm82.a4.v1	-
Glyma.08G177200.Wm82.a4.v1	-
Glyma.08G220000.Wm82.a4.v1	(1 of 233) PTHR24078 - DNAJ HOMOLOG SUBFAMILY C MEMBER
Glyma.11G137300.Wm82.a4.v1	(1 of 4) PTHR22763//PTHR22763:SF42 - RING ZINC FINGER PROTEIN // SUBFAMILY NOT NAMED
Glyma.11G208700.Wm82.a4.v1	-
Glyma.13G030900.Wm82.a4.v1	(1 of 3) PTHR31719//PTHR31719:SF16 - FAMILY NOT NAMED // NAC DOMAIN-CONTAINING PROTEIN 2
Glyma.13G092500.Wm82.a4.v1	(1 of 2) PTHR10788//PTHR10788:SF30 - TREHALOSE-6-PHOSPHATE SYNTHASE // ALPHA,ALPHA-TREHALOSE-PHOSPHATE SYNTHASE [UDP-FORMING] 11-RELATED
Glyma.13G219500.Wm82.a4.v1	(1 of 43) PF01423 - LSM domain (LSM)
Glyma.14G041700.Wm82.a4.v1	(1 of 2) PTHR31852:SF0 - LATE EMBRYOGENESIS ABUNDANT HYDROXYPROLINE-RICH GLYCOPROTEIN
Glyma.14G190800.Wm82.a4.v1	(1 of 19) K11254 - histone H4 (H4)
Glyma.15G071300.Wm82.a4.v1	(1 of 3) PF12481//PF13537 - Aluminium induced protein (DUF3700) // Glutamine amidotransferase domain (GATase_7)
Glyma.15G072400.Wm82.a4.v1	(1 of 12) PTHR11772//PTHR11772:SF14 - ASPARAGINE SYNTHETASE // SUBFAMILY NOT NAMED
Glyma.15G180000.Wm82.a4.v1	(1 of 8) PTHR31985:SF34 - ETHYLENE-RESPONSIVE TRANSCRIPTION FACTOR ERF018
Glyma.16G052000.Wm82.a4.v1	(1 of 2) PTHR22958 - RELATED TO MULTIFUNCTIONAL CYCLIN-DEPENDENT KINASE-RELATED
Glyma.16G127700.Wm82.a4.v1	(1 of 4) PTHR24078//PTHR24078:SF222 - DNAJ HOMOLOG SUBFAMILY C MEMBER // SUBFAMILY NOT NAMED
Glyma.16G165200.Wm82.a4.v1	(1 of 5) K08912 - light-harvesting complex II chlorophyll a/b binding protein 1 (LHCB1)
Glyma.17G067800.Wm82.a4.v1	(1 of 2) PTHR10788//PTHR10788:SF30 - TREHALOSE-6-PHOSPHATE SYNTHASE // ALPHA,ALPHA-TREHALOSE-PHOSPHATE SYNTHASE [UDP-FORMING] 11-RELATED
Glyma.17G135100.Wm82.a4.v1	(1 of 7) PTHR33593:SF2 - F5O11.5
Glyma.18G029300.Wm82.a4.v1	(1 of 4) PF07014//PF07231 - Hs1pro-1 protein C-terminus (Hs1pro-1_C) // Hs1pro-1 N-terminus (Hs1pro-1_N)
Glyma.18G045200.Wm82.a4.v1	-
Glyma.18G054100.Wm82.a4.v1	(1 of 4) PTHR13902:SF49 - SERINE/THREONINE-PROTEIN KINASE WNK4-RELATED
Glyma.19G187100.Wm82.a4.v1	(1 of 12) K13496 - UDP-glucosyl transferase 73C [EC:2.4.1.-] Glc - brassinosteroid (UGT73C)
Glyma.04G026500.Wm82.a4.v1	(1 of 4) PTHR10992//PTHR10992:SF866 - ALPHA/BETA HYDROLASE FOLD-CONTAINING PROTEIN // SUBFAMILY NOT NAMED	midnightblue	0.00179	0.509
Glyma.17G121600.Wm82.a4.v1	(1 of 2) K03128 - transcription initiation factor TFIID subunit 2 (TAF2)
Glyma.19G256700.Wm82.a4.v1	(1 of 5) PTHR11514//PTHR11514:SF47 - MYC // TRANSCRIPTION FACTOR ABA-INDUCIBLE BHLH-TYPE-RELATED
Glyma.16G208100.Wm82.a4.v1	(1 of 6) PTHR23024//PTHR23024:SF174 - MEMBER OF 'GDXG' FAMILY OF LIPOLYTIC ENZYMES // SUBFAMILY NOT NAMED
Glyma.01G083000.Wm82.a4.v1	(1 of 4) PTHR12161:SF23 - REGULATOR OF VPS4 ACTIVITY IN THE MVB PATHWAY PROTEIN
Glyma.13G162200.Wm82.a4.v1	(1 of 2) PTHR10903:SF68 - TRANSLOCASE OF CHLOROPLAST 90, CHLOROPLASTIC
Glyma.01G018400.Wm82.a4.v1	(1 of 2) PTHR11514//PTHR11514:SF43 - MYC // TRANSCRIPTION FACTOR MYC3-RELATED
Glyma.03G190300.Wm82.a4.v1	(1 of 331) PF01535//PF13041 - PPR repeat (PPR) // PPR repeat family (PPR_2)
Glyma.03G252300.Wm82.a4.v1	(1 of 2) PTHR23346//PTHR23346:SF7 - TRANSLATIONAL ACTIVATOR GCN1-RELATED // TRANSLATIONAL ACTIVATOR GCN1
Glyma.04G236600.Wm82.a4.v1	(1 of 2) PTHR24056//PTHR24056:SF181 - CELL DIVISION PROTEIN KINASE // PLASTID-LIPID-ASSOCIATED PROTEIN 14, CHLOROPLASTIC-RELATED
Glyma.06G019300.Wm82.a4.v1	(1 of 753) PF13041 - PPR repeat family (PPR_2)
Glyma.12G167300.Wm82.a4.v1	(1 of 2) PTHR31563:SF1 - ION CHANNEL POLLUX-RELATED
Glyma.14G026300.Wm82.a4.v1	(1 of 7) PF07714//PF11721//PF13855 - Protein tyrosine kinase (Pkinase_Tyr) // Di-glucose binding within endoplasmic reticulum (Malectin) // Leucine rich repeat (LRR_8)
Glyma.19G065600.Wm82.a4.v1	(1 of 4) K00264 - glutamate synthase (NADPH/NADH) (GLT1)
Glyma.02G005600.Wm82.a4.v1	(1 of 4) PTHR10641//PTHR10641:SF650 - MYB-LIKE DNA-BINDING PROTEIN MYB // SUBFAMILY NOT NAMED
Glyma.02G020400.Wm82.a4.v1	(1 of 5) PTHR31745//PTHR31745:SF2 - FAMILY NOT NAMED // SINGLE-STRANDED DNA-BINDING PROTEIN WHY1, CHLOROPLASTIC-RELATED
Glyma.02G031600.Wm82.a4.v1	(1 of 14) PTHR32285//PTHR32285:SF57 - FAMILY NOT NAMED // PROTEIN ALTERED XYLOGLUCAN 4
Glyma.03G127200.Wm82.a4.v1	(1 of 1) PTHR22762//PTHR22762:SF91 - ALPHA-GLUCOSIDASE // SUBFAMILY NOT NAMED
Glyma.04G077300.Wm82.a4.v1	(1 of 2) PTHR12192//PTHR12192:SF10 - CATION TRANSPORT PROTEIN CHAC-RELATED // SUBFAMILY NOT NAMED
Glyma.04G220900.Wm82.a4.v1	(1 of 2) PTHR10159//PTHR10159:SF326 - DUAL SPECIFICITY PROTEIN PHOSPHATASE // LAFORIN
Glyma.07G041400.Wm82.a4.v1	(1 of 8) PTHR33077:SF13 - PROTEIN TIFY 10A-RELATED
Glyma.07G051500.Wm82.a4.v1	(1 of 3) PTHR11514:SF40 - TRANSCRIPTION FACTOR BHLH14
Glyma.07G055200.Wm82.a4.v1	(1 of 5) PTHR11514//PTHR11514:SF47 - MYC // TRANSCRIPTION FACTOR ABA-INDUCIBLE BHLH-TYPE-RELATED
Glyma.07G209100.Wm82.a4.v1	(1 of 9) PTHR10209//PTHR10209:SF98 - OXIDOREDUCTASE, 2OG-FE II OXYGENASE FAMILY PROTEIN // SUBFAMILY NOT NAMED
Glyma.08G180500.Wm82.a4.v1	(1 of 4) PTHR22814//PTHR22814:SF80 - COPPER TRANSPORT PROTEIN ATOX1-RELATED // SUBFAMILY NOT NAMED
Glyma.08G341800.Wm82.a4.v1	(1 of 21) PTHR33107:SF5 - KUNITZ FAMILY TRYPSIN AND PROTEASE INHIBITOR PROTEIN-RELATED
Glyma.08G351932.Wm82.a4.v1	(1 of 22) 1.14.11.20 - Deacetoxyvindoline 4-hydroxylase / Desacetyoxyvindoline-17-hydroxylase
Glyma.11G087100.Wm82.a4.v1	(1 of 4) PTHR18966//PTHR18966:SF245 - IONOTROPIC GLUTAMATE RECEPTOR // SUBFAMILY NOT NAMED
Glyma.12G037700.Wm82.a4.v1	(1 of 2) PTHR10071:SF183 - GATA TRANSCRIPTION FACTOR 7
Glyma.12G138702.Wm82.a4.v1	(1 of 7) PTHR10759//PTHR10759:SF13 - 60S RIBOSOMAL PROTEIN L34 // SUBFAMILY NOT NAMED
Glyma.12G138800.Wm82.a4.v1	(1 of 2) K15803 - (-)-germacrene D synthase (GERD)
Glyma.13G043800.Wm82.a4.v1	(1 of 6) 3.6.3.36 - Taurine-transporting ATPase
Glyma.15G132400.Wm82.a4.v1	(1 of 2) PTHR36381:SF1 - ETHYLENE-REGULATED NUCLEAR PROTEIN ERT2-LIKE PROTEIN-RELATED
Glyma.16G146500.Wm82.a4.v1	(1 of 2) PTHR13693//PTHR13693:SF62 - CLASS II AMINOTRANSFERASE/8-AMINO-7-OXONONANOATE SYNTHASE // SUBFAMILY NOT NAMED
Glyma.16G213000.Wm82.a4.v1	(1 of 2) PTHR35698//PTHR35698:SF1 - FAMILY NOT NAMED // DNA-BINDING PROTEIN RHL1
Glyma.19G243500.Wm82.a4.v1	(1 of 4) PTHR21654//PTHR21654:SF22 - FAMILY NOT NAMED // TRIHELIX TRANSCRIPTION FACTOR GTL2
Glyma.01G063000.Wm82.a4.v1	(1 of 10) 5.4.99.30 - UDP-arabinopyranose mutase	turquoise	0.0071	0.447
Glyma.10G242150.Wm82.a4.v1	-
Glyma.18G259100.Wm82.a4.v1	(1 of 4) PTHR10641//PTHR10641:SF530 - MYB-LIKE DNA-BINDING PROTEIN MYB // SUBFAMILY NOT NAMED
Glyma.04G174600.Wm82.a4.v1	(1 of 3) 1.1.1.223 - Isopiperitenol dehydrogenase
Glyma.12G210900.Wm82.a4.v1	(1 of 47) KOG4282 - Transcription factor GT-2 and related proteins, contains trihelix DNA-binding/SANT domain
Glyma.06G166000.Wm82.a4.v1	(1 of 2) PTHR23315//PTHR23315:SF86 - BETA CATENIN-RELATED ARMADILLO REPEAT-CONTAINING // ARMADILLO/BETA-CATENIN-LIKE REPEAT-CONTAINING PROTEIN
Glyma.07G179900.Wm82.a4.v1	(1 of 2) PTHR10209//PTHR10209:SF142 - OXIDOREDUCTASE, 2OG-FE II OXYGENASE FAMILY PROTEIN // SUBFAMILY NOT NAMED
Glyma.01G017700.Wm82.a4.v1	(1 of 3) PTHR31065:SF2 - PLATZ TRANSCRIPTION FACTOR DOMAIN-CONTAINING PROTEIN
Glyma.01G018300.Wm82.a4.v1	(1 of 2) PTHR24006//PTHR24006:SF470 - FAMILY NOT NAMED // PROTEIN Y71A12B.15
Glyma.01G163000.Wm82.a4.v1	(1 of 6) PTHR13683//PTHR13683:SF232 - ASPARTYL PROTEASES // ASPARTYL PROTEASE FAMILY PROTEIN
Glyma.01G166100.Wm82.a4.v1	(1 of 4) PTHR24349:SF87 - CALCIUM-DEPENDENT PROTEIN KINASE 16-RELATED
Glyma.01G169000.Wm82.a4.v1	(1 of 4) PTHR22884//PTHR22884:SF339 - SET DOMAIN PROTEINS // PHD FINGER, SWIB/MDM2 AND GYF DOMAIN-CONTAINING PROTEIN
Glyma.01G192600.Wm82.a4.v1	(1 of 6) PTHR31304:SF6 - LOB DOMAIN-CONTAINING PROTEIN 37-RELATED
Glyma.02G013700.Wm82.a4.v1	(1 of 4) PTHR21493//PTHR21493:SF117 - CGI-141-RELATED/LIPASE CONTAINING PROTEIN // ALPHA/BETA-HYDROLASES SUPERFAMILY PROTEIN
Glyma.02G104300.Wm82.a4.v1	(1 of 1) K14595 - abscisate beta-glucosyltransferase (AOG)
Glyma.02G271100.Wm82.a4.v1	(1 of 2) PTHR12555//PTHR12555:SF14 - UBIQUITIN FUSION DEGRADATON PROTEIN 1 // SUBFAMILY NOT NAMED
Glyma.03G133800.Wm82.a4.v1	(1 of 9) K00006 - glycerol-3-phosphate dehydrogenase (NAD+) (GPD1)
Glyma.03G258000.Wm82.a4.v1	(1 of 4) PTHR13215:SF6 - RNA POLYMERASE II TRANSCRIPTIONAL COACTIVATOR KELP
Glyma.05G154100.Wm82.a4.v1	(1 of 4) 2.7.1.137 - Phosphatidylinositol 3-kinase / Type III phosphoinositide 3-kinase
Glyma.05G212300.Wm82.a4.v1	(1 of 4) PTHR31087:SF14 - PROTEIN LURP-ONE-RELATED 17
Glyma.05G214000.Wm82.a4.v1	(1 of 5) 1.1.1.44 - Phosphogluconate dehydrogenase (NADP(+)-dependent, decarboxylating) / Phosphogluconic acid dehydrogenase
Glyma.06G034500.Wm82.a4.v1	(1 of 2) PTHR12313//PTHR12313:SF10 - RNF5 // SUBFAMILY NOT NAMED
Glyma.07G039600.Wm82.a4.v1	(1 of 2) 2.7.6.5//3.2.1.37//3.2.1.55 - GTP diphosphokinase / Stringent factor // Xylan 1,4-beta-xylosidase / Xylobiase // Non-reducing end alpha-L-arabinofuranosidase / Arabinosidase
Glyma.07G055500.Wm82.a4.v1	(1 of 2) KOG0001//KOG0003//KOG0005//KOG2381 - Ubiquitin and ubiquitin-like proteins // Ubiquitin/60s ribosomal protein L40 fusion // Ubiquitin-like protein // Phosphatidylinositol 4-kinase
Glyma.07G132900.Wm82.a4.v1	(1 of 9) KOG2209 - Oxysterol-binding protein
Glyma.07G236000.Wm82.a4.v1	(1 of 14) PF12899 - Alkaline and neutral invertase (Glyco_hydro_100)
Glyma.08G064700.Wm82.a4.v1	(1 of 6) 1.2.1.70 - Glutamyl-tRNA reductase
Glyma.08G104600.Wm82.a4.v1	(1 of 12) 2.1.1.112 - Glucuronoxylan 4-O-methyltransferase
Glyma.08G153200.Wm82.a4.v1	(1 of 4) PTHR10634:SF22 - ZINC FINGER A20 AND AN1 DOMAIN-CONTAINING STRESS-ASSOCIATED PROTEIN 5
Glyma.08G174100.Wm82.a4.v1	(1 of 6) PTHR15835:SF6 - F20D23.9 PROTEIN
Glyma.08G241300.Wm82.a4.v1	(1 of 2) PTHR12286//PTHR12286:SF5 - UNCHARACTERIZED // SACCHAROPINE DEHYDROGENASE-LIKE OXIDOREDUCTASE
Glyma.09G020800.Wm82.a4.v1	(1 of 2) PTHR24413:SF124 - REGULATORY PROTEIN NPR3-RELATED
Glyma.09G036300.Wm82.a4.v1	(1 of 4) K10578 - ubiquitin-conjugating enzyme E2 J1 (UBE2J1, NCUBE1, UBC6)
Glyma.09G070000.Wm82.a4.v1	(1 of 3) PTHR10795//PTHR10795:SF434 - PROPROTEIN CONVERTASE SUBTILISIN/KEXIN // SUBTILISIN SERINE PROTEASE-RELATED
Glyma.09G071600.Wm82.a4.v1	(1 of 8) PTHR33077:SF13 - PROTEIN TIFY 10A-RELATED
Glyma.09G094900.Wm82.a4.v1	(1 of 4) PTHR35121:SF2 - GB|AAD20160.1
Glyma.09G223700.Wm82.a4.v1	(1 of 2) PTHR11662//PTHR11662:SF302 - SODIUM-DEPENDENT PHOSPHATE TRANSPORTERS // SUBFAMILY NOT NAMED
Glyma.10G022400.Wm82.a4.v1	(1 of 12) PF00620//PF00786 - RhoGAP domain (RhoGAP) // P21-Rho-binding domain (PBD)
Glyma.10G062200.Wm82.a4.v1	(1 of 12) K13496 - UDP-glucosyl transferase 73C [EC:2.4.1.-] Glc - brassinosteroid (UGT73C)
Glyma.11G000500.Wm82.a4.v1	(1 of 7) 2.4.1.128 - Scopoletin glucosyltransferase
Glyma.11G135400.Wm82.a4.v1	(1 of 40) K07904 - Ras-related protein Rab-11A (RAB11A)
Glyma.11G148900.Wm82.a4.v1	(1 of 9) K00006 - glycerol-3-phosphate dehydrogenase (NAD+) (GPD1)
Glyma.12G129800.Wm82.a4.v1	(1 of 2) PTHR10788//PTHR10788:SF18 - TREHALOSE-6-PHOSPHATE SYNTHASE // ALPHA,ALPHA-TREHALOSE-PHOSPHATE SYNTHASE [UDP-FORMING] 7-RELATED
Glyma.13G096500.Wm82.a4.v1	(1 of 2) PTHR19384//PTHR19384:SF79 - FLAVODOXIN-RELATED // SUBFAMILY NOT NAMED
Glyma.13G297200.Wm82.a4.v1	(1 of 4) PTHR31805//PTHR31805:SF3 - FAMILY NOT NAMED // PROLINE-RICH PROTEIN-RELATED
Glyma.13G319000.Wm82.a4.v1	(1 of 4) PTHR21022//PTHR21022:SF5 - PREPHENATE DEHYDRATASE P PROTEIN // SUBFAMILY NOT NAMED
Glyma.13G338400.Wm82.a4.v1	(1 of 2) PTHR22763//PTHR22763:SF40 - RING ZINC FINGER PROTEIN // SUBFAMILY NOT NAMED
Glyma.14G016300.Wm82.a4.v1	(1 of 2) PTHR14493:SF51 - ZINC FINGER CCCH DOMAIN-CONTAINING PROTEIN 29-RELATED
Glyma.14G188500.Wm82.a4.v1	-
Glyma.14G199200.Wm82.a4.v1	(1 of 13) PTHR12542//PTHR12542:SF29 - EXOCYST COMPLEX PROTEIN EXO70 // SUBFAMILY NOT NAMED
Glyma.15G055700.Wm82.a4.v1	(1 of 6) 4.1.99.12 - 3,4-dihydroxy-2-butanone-4-phosphate synthase / L-3,4-dihydroxybutan-2-one-4-phosphate synthase
Glyma.15G179600.Wm82.a4.v1	(1 of 8) PTHR33077:SF13 - PROTEIN TIFY 10A-RELATED
Glyma.15G268100.Wm82.a4.v1	(1 of 2) PTHR22763//PTHR22763:SF43 - RING ZINC FINGER PROTEIN // SUBFAMILY NOT NAMED
Glyma.16G023900.Wm82.a4.v1	(1 of 5) PTHR11514//PTHR11514:SF47 - MYC // TRANSCRIPTION FACTOR ABA-INDUCIBLE BHLH-TYPE-RELATED
Glyma.16G173400.Wm82.a4.v1	(1 of 4) PTHR34576:SF3 - MEMBRANE-ASSOCIATED KINASE REGULATOR 6-RELATED
Glyma.17G021000.Wm82.a4.v1	(1 of 10) PF15365 - Proline-rich nuclear receptor coactivator (PNRC)
Glyma.17G037400.Wm82.a4.v1	(1 of 14) PF12899 - Alkaline and neutral invertase (Glyco_hydro_100)
Glyma.17G047300.Wm82.a4.v1	(1 of 8) PTHR31985:SF34 - ETHYLENE-RESPONSIVE TRANSCRIPTION FACTOR ERF018
Glyma.17G069600.Wm82.a4.v1	(1 of 3) PTHR10366//PTHR10366:SF459 - NAD DEPENDENT EPIMERASE/DEHYDRATASE // SUBFAMILY NOT NAMED
Glyma.17G259300.Wm82.a4.v1	-
Glyma.17G260400.Wm82.a4.v1	(1 of 5) PTHR31867//PTHR31867:SF4 - FAMILY NOT NAMED // EXPANSIN-A11
Glyma.18G236000.Wm82.a4.v1	(1 of 72) PF11721 - Di-glucose binding within endoplasmic reticulum (Malectin)
Glyma.19G127800.Wm82.a4.v1	(1 of 3) PTHR15141//PTHR15141:SF40 - TRANSCRIPTION ELONGATION FACTOR B POLYPEPTIDE 3 // MEDIATOR OF RNA POLYMERASE II TRANSCRIPTION SUBUNIT 26A-RELATED
Glyma.19G140800.Wm82.a4.v1	(1 of 2) PTHR24349//PTHR24349:SF93 - SERINE/THREONINE-PROTEIN KINASE // CALCIUM-DEPENDENT PROTEIN KINASE 14
Glyma.19G198100.Wm82.a4.v1	-
Glyma.19G200000.Wm82.a4.v1	(1 of 2) PTHR12526//PTHR12526:SF352 - GLYCOSYLTRANSFERASE // SUBFAMILY NOT NAMED
Glyma.20G124200.Wm82.a4.v1	(1 of 80) PF14009 - Domain of unknown function (DUF4228) (DUF4228)
Glyma.20G151500.Wm82.a4.v1	(1 of 3) 2.7.7.4 - Sulfate adenylyltransferase / Sulfurylase
Glyma.20G172100.Wm82.a4.v1	(1 of 2) PTHR31989//PTHR31989:SF27 - FAMILY NOT NAMED // F23M19.14 PROTEIN-RELATED
Glyma.01G010500.Wm82.a4.v1	(1 of 4) PTHR23155//PTHR23155:SF633 - LEUCINE-RICH REPEAT-CONTAINING PROTEIN // SUBFAMILY NOT NAMED
Glyma.01G010700.Wm82.a4.v1	(1 of 4) PTHR23155//PTHR23155:SF633 - LEUCINE-RICH REPEAT-CONTAINING PROTEIN // SUBFAMILY NOT NAMED
Glyma.01G013900.Wm82.a4.v1	(1 of 2) PTHR31062//PTHR31062:SF16 - FAMILY NOT NAMED // XYLOGLUCAN ENDOTRANSGLUCOSYLASE/HYDROLASE PROTEIN 29-RELATED
Glyma.01G014000.Wm82.a4.v1	(1 of 2) 2.4.1.12//2.4.2.24 - Cellulose synthase (UDP-forming) / UDP-glucose-cellulose glucosyltransferase // 1,4-beta-D-xylan synthase
Glyma.01G014700.Wm82.a4.v1	(1 of 3) PF02373//PF02375//PF02928 - JmjC domain, hydroxylase (JmjC) // jmjN domain (JmjN) // C5HC2 zinc finger (zf-C5HC2)
Glyma.01G021000.Wm82.a4.v1	(1 of 12) K00083 - cinnamyl-alcohol dehydrogenase (E1.1.1.195)
Glyma.01G025600.Wm82.a4.v1	(1 of 3) PTHR23155:SF516 - PLANT INTRACELLULAR RAS-GROUP-RELATED LRR PROTEIN 1-RELATED
Glyma.01G027433.Wm82.a4.v1	-
Glyma.01G027500.Wm82.a4.v1	(1 of 2) 3.1.1.3//3.1.1.32 - Triacylglycerol lipase / Triglyceride lipase // Phospholipase A(1) / Phospholipase A1
Glyma.01G031500.Wm82.a4.v1	(1 of 18) K00128 - aldehyde dehydrogenase (NAD+) (E1.2.1.3)
Glyma.01G036000.Wm82.a4.v1	(1 of 2) 2.4.1.195 - N-hydroxythioamide S-beta-glucosyltransferase / Uridine diphosphoglucose-thiohydroximate glucosyltransferase
Glyma.01G041700.Wm82.a4.v1	(1 of 87) K09338 - homeobox-leucine zipper protein (HD-ZIP)
Glyma.01G043100.Wm82.a4.v1	(1 of 8) PTHR24361:SF334 - MITOGEN-ACTIVATED PROTEIN KINASE KINASE KINASE 19-RELATED
Glyma.01G044100.Wm82.a4.v1	(1 of 5) PTHR27001//PTHR27001:SF160 - FAMILY NOT NAMED // PROTEIN KINASE 2A, CHLOROPLASTIC-RELATED
Glyma.01G060300.Wm82.a4.v1	(1 of 4) PF16136 - Putative nuclear localisation signal (NINJA_B)
Glyma.01G080500.Wm82.a4.v1	-
Glyma.01G080600.Wm82.a4.v1	(1 of 3) PTHR11614//PTHR11614:SF94 - PHOSPHOLIPASE-RELATED // ALPHA/BETA-HYDROLASE-LIKE PROTEIN
Glyma.01G086700.Wm82.a4.v1	(1 of 4) PTHR31003:SF4 - GENOMIC DNA, CHROMOSOME 3, TAC CLONE:K13N2-RELATED
Glyma.01G106000.Wm82.a4.v1	(1 of 7) PTHR11260//PTHR11260:SF303 - GLUTATHIONE S-TRANSFERASE, GST, SUPERFAMILY, GST DOMAIN CONTAINING // GLUTATHIONE S-TRANSFERASE U1-RELATED
Glyma.01G109800.Wm82.a4.v1	(1 of 2) PTHR31741//PTHR31741:SF4 - FAMILY NOT NAMED // O-FUCOSYLTRANSFERASE FAMILY PROTEIN
Glyma.01G110500.Wm82.a4.v1	(1 of 2) PTHR10994:SF65 - RETICULON-LIKE PROTEIN B12
Glyma.01G120800.Wm82.a4.v1	(1 of 4) PTHR35499//PTHR35499:SF2 - FAMILY NOT NAMED // ALC-INTERACTING PROTEIN 1
Glyma.01G121209.Wm82.a4.v1	(1 of 7) PTHR10209:SF134 - 2-OXOGLUTARATE (2OG) AND FE(II)-DEPENDENT OXYGENASE-LIKE PROTEIN
Glyma.01G128100.Wm82.a4.v1	(1 of 8) K13424 - WRKY transcription factor 33 (WRKY33)
Glyma.01G133300.Wm82.a4.v1	(1 of 78) PF00069//PF00560//PF08263//PF13855 - Protein kinase domain (Pkinase) // Leucine Rich Repeat (LRR_1) // Leucine rich repeat N-terminal domain (LRRNT_2) // Leucine rich repeat (LRR_8)
Glyma.01G150500.Wm82.a4.v1	(1 of 1) PTHR10032//PTHR10032:SF204 - ZINC FINGER PROTEIN WITH KRAB AND SCAN DOMAINS // PROTEIN Y5F2A.4
Glyma.01G153300.Wm82.a4.v1	(1 of 6) PTHR24286//PTHR24286:SF10 - FAMILY NOT NAMED // ABSCISIC ACID 8'-HYDROXYLASE 1-RELATED
Glyma.01G175800.Wm82.a4.v1	-
Glyma.01G176200.Wm82.a4.v1	-
Glyma.01G180432.Wm82.a4.v1	(1 of 80) PF14009 - Domain of unknown function (DUF4228) (DUF4228)
Glyma.01G182400.Wm82.a4.v1	(1 of 1) PF00008//PF07714 - EGF-like domain (EGF) // Protein tyrosine kinase (Pkinase_Tyr)
Glyma.01G183300.Wm82.a4.v1	(1 of 20) PTHR23155//PTHR23155:SF543 - LEUCINE-RICH REPEAT-CONTAINING PROTEIN // SUBFAMILY NOT NAMED
Glyma.01G185800.Wm82.a4.v1	(1 of 4) PTHR10015//PTHR10015:SF166 - HEAT SHOCK TRANSCRIPTION FACTOR // HEAT STRESS TRANSCRIPTION FACTOR B-1
Glyma.01G186900.Wm82.a4.v1	(1 of 8) PTHR24361:SF334 - MITOGEN-ACTIVATED PROTEIN KINASE KINASE KINASE 19-RELATED
Glyma.01G189100.Wm82.a4.v1	(1 of 4) PTHR31282//PTHR31282:SF33 - FAMILY NOT NAMED // WRKY TRANSCRIPTION FACTOR 15-RELATED
Glyma.01G190100.Wm82.a4.v1	(1 of 4) PTHR10641//PTHR10641:SF551 - MYB-LIKE DNA-BINDING PROTEIN MYB // MYB TRANSCRIPTION FACTOR
Glyma.01G190600.Wm82.a4.v1	(1 of 19) K14487 - auxin responsive GH3 gene family (GH3)
Glyma.01G193500.Wm82.a4.v1	(1 of 1) K11492 - condensin-2 complex subunit G2 (NCAPG2, LUZP5)
Glyma.01G193600.Wm82.a4.v1	(1 of 5) PTHR24093//PTHR24093:SF262 - FAMILY NOT NAMED // CALCIUM-TRANSPORTING ATPASE 2, PLASMA MEMBRANE-TYPE-RELATED
Glyma.01G200466.Wm82.a4.v1	(1 of 5) PTHR11200:SF107 - TYPE I INOSITOL 1,4,5-TRISPHOSPHATE 5-PHOSPHATASE 2
Glyma.01G200532.Wm82.a4.v1	(1 of 5) PTHR11200:SF107 - TYPE I INOSITOL 1,4,5-TRISPHOSPHATE 5-PHOSPHATASE 2
Glyma.01G204400.Wm82.a4.v1	(1 of 8) PTHR33077:SF13 - PROTEIN TIFY 10A-RELATED
Glyma.01G207950.Wm82.a4.v1	(1 of 16) PF08458 - Plant pleckstrin homology-like region (PH_2)
Glyma.01G212100.Wm82.a4.v1	(1 of 7) PTHR33593:SF2 - F5O11.5
Glyma.01G212500.Wm82.a4.v1	-
Glyma.01G212800.Wm82.a4.v1	(1 of 1) PF13740 - ACT domain (ACT_6)
Glyma.01G214600.Wm82.a4.v1	(1 of 4) PTHR31750//PTHR31750:SF4 - FAMILY NOT NAMED // PROTEIN STAY-GREEN 1, CHLOROPLASTIC-RELATED
Glyma.01G216000.Wm82.a4.v1	(1 of 3) PTHR31839//PTHR31839:SF0 - FAMILY NOT NAMED // DEHYDRATION-RESPONSIVE ELEMENT-BINDING PROTEIN 1E-RELATED
Glyma.01G216600.Wm82.a4.v1	(1 of 4) PTHR11206:SF127 - MATE EFFLUX FAMILY PROTEIN
Glyma.01G218600.Wm82.a4.v1	(1 of 7) PTHR22950//PTHR22950:SF269 - AMINO ACID TRANSPORTER // EXPRESSED PROTEIN
Glyma.01G219001.Wm82.a4.v1	(1 of 16) 3.6.3.4 - Cu(2+)-exporting ATPase
Glyma.01G222300.Wm82.a4.v1	(1 of 4) K13425 - WRKY transcription factor 22 (WRKY22)
Glyma.01G222600.Wm82.a4.v1	(1 of 4) PTHR31087:SF14 - PROTEIN LURP-ONE-RELATED 17
Glyma.01G223600.Wm82.a4.v1	(1 of 2) PTHR32468:SF34 - CATION/H(+) ANTIPORTER 18
Glyma.01G225000.Wm82.a4.v1	(1 of 16) PTHR31657//PTHR31657:SF9 - FAMILY NOT NAMED // ETHYLENE-RESPONSIVE TRANSCRIPTION FACTOR CRF5-RELATED
Glyma.01G225100.Wm82.a4.v1	(1 of 2) PTHR13832//PTHR13832:SF294 - PROTEIN PHOSPHATASE 2C // SUBFAMILY NOT NAMED
Glyma.01G225800.Wm82.a4.v1	(1 of 4) PTHR10366//PTHR10366:SF308 - NAD DEPENDENT EPIMERASE/DEHYDRATASE // SUBFAMILY NOT NAMED
Glyma.01G232500.Wm82.a4.v1	(1 of 2) PTHR13301:SF72 - CELLULOSE SYNTHASE-LIKE PROTEIN D3
Glyma.01G234800.Wm82.a4.v1	(1 of 15) PF01918 - Alba (Alba)
Glyma.01G235600.Wm82.a4.v1	(1 of 6) PTHR22893//PTHR22893:SF44 - NADH OXIDOREDUCTASE-RELATED // SUBFAMILY NOT NAMED
Glyma.01G239600.Wm82.a4.v1	(1 of 1) K13258 - 2-hydroxyisoflavanone dehydratase (HID)
Glyma.02G000800.Wm82.a4.v1	(1 of 1) PTHR23042:SF65 - TRANSCRIPTION FACTOR BHLH92
Glyma.02G007400.Wm82.a4.v1	(1 of 2) PTHR22595//PTHR22595:SF35 - CHITINASE-RELATED // SUBFAMILY NOT NAMED
Glyma.02G008500.Wm82.a4.v1	(1 of 8) K13436 - pto-interacting protein 1 (PTI1)
Glyma.02G009100.Wm82.a4.v1	(1 of 2) PTHR13832//PTHR13832:SF165 - PROTEIN PHOSPHATASE 2C // PROTEIN PHOSPHATASE 2C 13-RELATED
Glyma.02G009500.Wm82.a4.v1	(1 of 4) PTHR33669:SF1 - PROTEIN NIM1-INTERACTING 1
Glyma.02G010900.Wm82.a4.v1	(1 of 4) PTHR31221//PTHR31221:SF23 - FAMILY NOT NAMED // WRKY TRANSCRIPTION FACTOR 23-RELATED
Glyma.02G012700.Wm82.a4.v1	(1 of 4) PTHR22952//PTHR22952:SF167 - CAMP-RESPONSE ELEMENT BINDING PROTEIN-RELATED // SUBFAMILY NOT NAMED
Glyma.02G013500.Wm82.a4.v1	(1 of 3) K10728 - topoisomerase (DNA) II binding protein 1 (TOPBP1)
Glyma.02G014300.Wm82.a4.v1	(1 of 65) PF05553 - Cotton fibre expressed protein (DUF761)
Glyma.02G018450.Wm82.a4.v1	(1 of 2) PTHR31348//PTHR31348:SF4 - FAMILY NOT NAMED // PHYTOCHROME A-ASSOCIATED F-BOX PROTEIN
Glyma.02G024200.Wm82.a4.v1	(1 of 4) PTHR31205:SF2 - ACTIN CROSS-LINKING PROTEIN
Glyma.02G029200.Wm82.a4.v1	(1 of 6) PTHR22844//PTHR22844:SF159 - F-BOX AND WD40 DOMAIN PROTEIN // F3I6.5 PROTEIN
Glyma.02G029900.Wm82.a4.v1	(1 of 2) 2.4.1.195 - N-hydroxythioamide S-beta-glucosyltransferase / Uridine diphosphoglucose-thiohydroximate glucosyltransferase
Glyma.02G034200.Wm82.a4.v1	(1 of 3) PTHR23315//PTHR23315:SF116 - BETA CATENIN-RELATED ARMADILLO REPEAT-CONTAINING // U-BOX DOMAIN-CONTAINING PROTEIN 18-RELATED
Glyma.02G036400.Wm82.a4.v1	(1 of 26) PF00646//PF01344 - F-box domain (F-box) // Kelch motif (Kelch_1)
Glyma.02G038400.Wm82.a4.v1	(1 of 2) PTHR23315:SF102 - ARMADILLO REPEAT ONLY 4 PROTEIN
Glyma.02G041900.Wm82.a4.v1	(1 of 1) PTHR21152//PTHR21152:SF1 - AMINOTRANSFERASE CLASS V // PHOSPHOSERINE AMINOTRANSFERASE
Glyma.02G042800.Wm82.a4.v1	(1 of 60) PF03087 - Arabidopsis protein of unknown function (DUF241)
Glyma.02G071400.Wm82.a4.v1	(1 of 5) PTHR32227:SF95 - GLUCAN ENDO-1,3-BETA-GLUCOSIDASE 8-RELATED
Glyma.02G072300.Wm82.a4.v1	(1 of 4) PTHR34132//PTHR34132:SF1 - FAMILY NOT NAMED // EMB|CAB87627.1
Glyma.02G072400.Wm82.a4.v1	(1 of 2) PTHR34114//PTHR34114:SF2 - FAMILY NOT NAMED // ARABINOGALACTAN PEPTIDE 12-RELATED
Glyma.02G073700.Wm82.a4.v1	(1 of 8) PTHR19139//PTHR19139:SF167 - AQUAPORIN TRANSPORTER // AQUAPORIN PIP2-1-RELATED
Glyma.02G075000.Wm82.a4.v1	(1 of 11) K15378 - solute carrier family 45, member 1/2/4 (SLC45A1_2_4)
Glyma.02G080200.Wm82.a4.v1	(1 of 349) PF00847 - AP2 domain (AP2)
Glyma.02G090800.Wm82.a4.v1	(1 of 5) K03262 - translation initiation factor 5 (EIF5)
Glyma.02G098800.Wm82.a4.v1	(1 of 4) PTHR31003:SF4 - GENOMIC DNA, CHROMOSOME 3, TAC CLONE:K13N2-RELATED
Glyma.02G104200.Wm82.a4.v1	(1 of 4) PTHR11911//PTHR11911:SF109 - INOSINE-5-MONOPHOSPHATE DEHYDROGENASE RELATED // SUBFAMILY NOT NAMED
Glyma.02G106000.Wm82.a4.v1	(1 of 2) PTHR15837:SF0 - RAN GUANINE NUCLEOTIDE RELEASE FACTOR
Glyma.02G106100.Wm82.a4.v1	(1 of 5) PTHR24089:SF282 - PEROXISOMAL ADENINE NUCLEOTIDE CARRIER 1-RELATED
Glyma.02G111500.Wm82.a4.v1	(1 of 2) PTHR13018//PTHR13018:SF45 - PROBABLE MEMBRANE PROTEIN DUF221-RELATED // EARLY-RESPONSIVE TO DEHYDRATION STRESS PROTEIN (ERD4)
Glyma.02G127300.Wm82.a4.v1	(1 of 2) PTHR31388//PTHR31388:SF9 - FAMILY NOT NAMED // PEROXIDASE 11
Glyma.02G128700.Wm82.a4.v1	-
Glyma.02G128800.Wm82.a4.v1	(1 of 4) PF06880 - Protein of unknown function (DUF1262) (DUF1262)
Glyma.02G132500.Wm82.a4.v1	(1 of 349) PF00847 - AP2 domain (AP2)
Glyma.02G132900.Wm82.a4.v1	(1 of 2) PTHR36035//PTHR36035:SF1 - FAMILY NOT NAMED // PROTEIN DISULFIDE-ISOMERASE SCO2
Glyma.02G147200.Wm82.a4.v1	(1 of 4) K14319 - Ran GTPase-activating protein 1 (RANGAP1)
Glyma.02G148200.Wm82.a4.v1	(1 of 6) PTHR13683//PTHR13683:SF379 - ASPARTYL PROTEASES // ASPARTYL PROTEASE-LIKE PROTEIN
Glyma.02G149600.Wm82.a4.v1	(1 of 24) K10523 - speckle-type POZ protein (SPOP)
Glyma.02G171200.Wm82.a4.v1	(1 of 4) PTHR32285//PTHR32285:SF22 - FAMILY NOT NAMED // PROTEIN TRICHOME BIREFRINGENCE-RELATED
Glyma.02G195400.Wm82.a4.v1	(1 of 6) PTHR19957:SF69 - SYNTAXIN-121-RELATED
Glyma.02G195500.Wm82.a4.v1	(1 of 2) PTHR18934//PTHR18934:SF100 - ATP-DEPENDENT RNA HELICASE // ATP-DEPENDENT RNA HELICASE DHX30-RELATED
Glyma.02G195900.Wm82.a4.v1	(1 of 6) PTHR22849:SF38 - E3 UBIQUITIN-PROTEIN LIGASE PUB22-RELATED
Glyma.02G198300.Wm82.a4.v1	(1 of 4) PTHR31223//PTHR31223:SF20 - FAMILY NOT NAMED // CYTOKININ RIBOSIDE 5'-MONOPHOSPHATE PHOSPHORIBOHYDROLASE LOG7
Glyma.02G203200.Wm82.a4.v1	(1 of 2) PTHR23213:SF232 - FORMIN-LIKE PROTEIN 13
Glyma.02G205001.Wm82.a4.v1	(1 of 7) PTHR23067//PTHR23067:SF43 - DOUBLE-STRANDED RNA-BINDING ZINC FINGER PROTEIN // SUBFAMILY NOT NAMED
Glyma.02G208200.Wm82.a4.v1	(1 of 7) PTHR31279//PTHR31279:SF3 - FAMILY NOT NAMED // (PHI-1) PROTEIN, PUTATIVE-RELATED
Glyma.02G208400.Wm82.a4.v1	(1 of 3) K01626 - 3-deoxy-7-phosphoheptulonate synthase (E2.5.1.54, aroF, aroG, aroH)
Glyma.02G211600.Wm82.a4.v1	(1 of 3) PTHR22778//PTHR22778:SF19 - OVARIAN CANCER GENE-2 PROTEIN-RELATED // SUBFAMILY NOT NAMED
Glyma.02G211700.Wm82.a4.v1	(1 of 2) K15100 - solute carrier family 25 (mitochondrial citrate transporter), member 1 (SLC25A1, CTP)
Glyma.02G217600.Wm82.a4.v1	(1 of 7) PTHR23029//PTHR23029:SF40 - PHOSPHOGLYCERATE MUTASE // PHOSPHOGLYCERATE MUTASE-LIKE PROTEIN
Glyma.02G227000.Wm82.a4.v1	(1 of 1) PF00642//PF13637 - Zinc finger C-x8-C-x5-C-x3-H type (and similar) (zf-CCCH) // Ankyrin repeats (many copies) (Ank_4)
Glyma.02G227700.Wm82.a4.v1	(1 of 12) K17871 - NADH:ubiquinone reductase (non-electrogenic) (ndh1)
Glyma.02G228200.Wm82.a4.v1	(1 of 5) PTHR13832//PTHR13832:SF117 - PROTEIN PHOSPHATASE 2C // PROTEIN PHOSPHATASE 2C-LIKE PROTEIN-RELATED
Glyma.02G228300.Wm82.a4.v1	(1 of 4) PTHR24361:SF390 - F10K1.14 PROTEIN-RELATED
Glyma.02G232600.Wm82.a4.v1	(1 of 8) K13424 - WRKY transcription factor 33 (WRKY33)
Glyma.02G245700.Wm82.a4.v1	(1 of 10) PTHR10891:SF573 - CALCIUM-BINDING PROTEIN CML24-RELATED
Glyma.02G247600.Wm82.a4.v1	(1 of 51) 2.7.10.2//2.7.11.1 - Non-specific protein-tyrosine kinase / Cytoplasmic protein tyrosine kinase // Non-specific serine/threonine protein kinase / Threonine-specific protein kinase
Glyma.02G254600.Wm82.a4.v1	(1 of 39) 2.3.1.133 - Shikimate O-hydroxycinnamoyltransferase
Glyma.02G255000.Wm82.a4.v1	(1 of 8) PTHR19139//PTHR19139:SF169 - AQUAPORIN TRANSPORTER // AQUAPORIN PIP1-4-RELATED
Glyma.02G255400.Wm82.a4.v1	(1 of 4) PF07014//PF07231 - Hs1pro-1 protein C-terminus (Hs1pro-1_C) // Hs1pro-1 N-terminus (Hs1pro-1_N)
Glyma.02G257700.Wm82.a4.v1	(1 of 11) 1.14.11.19 - Leucocyanidin oxygenase / Leucoanthocyanidin dioxygenase
Glyma.02G268200.Wm82.a4.v1	(1 of 8) PTHR10209//PTHR10209:SF193 - OXIDOREDUCTASE, 2OG-FE II OXYGENASE FAMILY PROTEIN // 1-AMINOCYCLOPROPANE-1-CARBOXYLATE OXIDASE 3-RELATED
Glyma.02G269600.Wm82.a4.v1	(1 of 2) PTHR27001:SF183 - PROTEIN LYK5
Glyma.02G269700.Wm82.a4.v1	(1 of 2) PTHR11654//PTHR11654:SF154 - OLIGOPEPTIDE TRANSPORTER-RELATED // PROTEIN NRT1/ PTR FAMILY 6.4
Glyma.02G271300.Wm82.a4.v1	(1 of 1) PTHR13018:SF46 - ERD (EARLY-RESPONSIVE TO DEHYDRATION STRESS) FAMILY PROTEIN-RELATED
Glyma.02G273900.Wm82.a4.v1	(1 of 1) PTHR22835//PTHR22835:SF180 - ZINC FINGER FYVE DOMAIN CONTAINING PROTEIN // SUBFAMILY NOT NAMED
Glyma.02G277300.Wm82.a4.v1	(1 of 106) PF03168 - Late embryogenesis abundant protein (LEA_2)
Glyma.02G280100.Wm82.a4.v1	(1 of 80) PF14009 - Domain of unknown function (DUF4228) (DUF4228)
Glyma.02G288600.Wm82.a4.v1	(1 of 7) PF07714//PF11721//PF13855 - Protein tyrosine kinase (Pkinase_Tyr) // Di-glucose binding within endoplasmic reticulum (Malectin) // Leucine rich repeat (LRR_8)
Glyma.02G291900.Wm82.a4.v1	(1 of 11) KOG2536 - MAM33, mitochondrial matrix glycoprotein
Glyma.02G292700.Wm82.a4.v1	(1 of 12) PF04885 - Stigma-specific protein, Stig1 (Stig1)
Glyma.02G296600.Wm82.a4.v1	(1 of 2) PTHR14493:SF51 - ZINC FINGER CCCH DOMAIN-CONTAINING PROTEIN 29-RELATED
Glyma.02G297700.Wm82.a4.v1	(1 of 111) PF03514 - GRAS domain family (GRAS)
Glyma.02G309200.Wm82.a4.v1	-
Glyma.03G001500.Wm82.a4.v1	(1 of 4) PTHR31284:SF9 - HAD SUPERFAMILY, SUBFAMILY IIIB ACID PHOSPHATASE
Glyma.03G005800.Wm82.a4.v1	(1 of 10) PTHR11206//PTHR11206:SF102 - MULTIDRUG RESISTANCE PROTEIN // MATE EFFLUX FAMILY PROTEIN
Glyma.03G008300.Wm82.a4.v1	(1 of 2) PTHR15486:SF27 - GLYCEROL-3-PHOSPHATE 2-O-ACYLTRANSFERASE 4-RELATED
Glyma.03G011200.Wm82.a4.v1	(1 of 4) PTHR31500:SF10 - AT HOOK MOTIF DNA-BINDING FAMILY PROTEIN
Glyma.03G014500.Wm82.a4.v1	-
Glyma.03G016400.Wm82.a4.v1	(1 of 17) PTHR32246:SF20 - BON1-ASSOCIATED PROTEIN 1-RELATED
Glyma.03G023900.Wm82.a4.v1	(1 of 5) PF07386 - Protein of unknown function (DUF1499) (DUF1499)
Glyma.03G035200.Wm82.a4.v1	(1 of 2) PTHR23336//PTHR23336:SF24 - ZINC FINGER CW-TYPE COILED-COIL DOMAIN PROTEIN 3. // SUBFAMILY NOT NAMED
Glyma.03G042700.Wm82.a4.v1	(1 of 8) K13424 - WRKY transcription factor 33 (WRKY33)
Glyma.03G056800.Wm82.a4.v1	(1 of 4) PTHR35499//PTHR35499:SF2 - FAMILY NOT NAMED // ALC-INTERACTING PROTEIN 1
Glyma.03G057100.Wm82.a4.v1	(1 of 11) 1.14.11.19 - Leucocyanidin oxygenase / Leucoanthocyanidin dioxygenase
Glyma.03G079150.Wm82.a4.v1	-
Glyma.03G084300.Wm82.a4.v1	(1 of 2) PF07897//PF16135 - Ethylene-responsive binding factor-associated repression (EAR) // TPL-binding domain in jasmonate signalling (Jas)
Glyma.03G088800.Wm82.a4.v1	(1 of 3) PTHR24351//PTHR24351:SF69 - RIBOSOMAL PROTEIN S6 KINASE // AGC (CAMP-DEPENDENT, CGMP-DEPENDENT AND PROTEIN KINASE C) KINASE FAMILY PROTEIN-RELATED
Glyma.03G098600.Wm82.a4.v1	(1 of 7) 1.1.1.54//1.3.1.102//1.3.1.74 - Allyl-alcohol dehydrogenase // 2-alkenal reductase (NADP(+)) / NADPH-dependent alkenal/one oxidoreductase // 2-alkenal reductase (NAD(P)(+)) / NADPH:2-alkenal alpha,beta-hydrogenase
Glyma.03G113200.Wm82.a4.v1	(1 of 6) 1.1.1.198 - (+)-borneol dehydrogenase
Glyma.03G117500.Wm82.a4.v1	(1 of 3) PTHR31251:SF4 - SQUAMOSA PROMOTER-BINDING-LIKE PROTEIN 8
Glyma.03G122000.Wm82.a4.v1	(1 of 2) K09754 - coumaroylquinate(coumaroylshikimate) 3'-monooxygenase (CYP98A3, C3'H)
Glyma.03G123200.Wm82.a4.v1	(1 of 3) PTHR22952//PTHR22952:SF17 - CAMP-RESPONSE ELEMENT BINDING PROTEIN-RELATED // CYCLIC AMP RESPONSE ELEMENT-BINDING PROTEIN B
Glyma.03G124300.Wm82.a4.v1	(1 of 6) PF16712 - Coiled-coil regions of plant-specific actin-binding protein (SCAB_CC)
Glyma.03G124700.Wm82.a4.v1	(1 of 3) PTHR15141//PTHR15141:SF40 - TRANSCRIPTION ELONGATION FACTOR B POLYPEPTIDE 3 // MEDIATOR OF RNA POLYMERASE II TRANSCRIPTION SUBUNIT 26A-RELATED
Glyma.03G129300.Wm82.a4.v1	(1 of 1) 2.1.1.145 - Trans-aconitate 3-methyltransferase
Glyma.03G131900.Wm82.a4.v1	(1 of 4) PTHR33790//PTHR33790:SF1 - FAMILY NOT NAMED // PROTEIN EARLY RESPONSIVE TO DEHYDRATION 15
Glyma.03G138000.Wm82.a4.v1	(1 of 2) PTHR24349//PTHR24349:SF93 - SERINE/THREONINE-PROTEIN KINASE // CALCIUM-DEPENDENT PROTEIN KINASE 14
Glyma.03G144400.Wm82.a4.v1	(1 of 3) PTHR33493//PTHR33493:SF2 - FAMILY NOT NAMED // LATE EMBRYOGENESIS ABUNDANT PROTEIN 4-5
Glyma.03G145900.Wm82.a4.v1	(1 of 4) PTHR32285//PTHR32285:SF22 - FAMILY NOT NAMED // PROTEIN TRICHOME BIREFRINGENCE-RELATED
Glyma.03G157700.Wm82.a4.v1	(1 of 1) PF00122//PF00689//PF12710 - E1-E2 ATPase (E1-E2_ATPase) // Cation transporting ATPase, C-terminus (Cation_ATPase_C) // haloacid dehalogenase-like hydrolase (HAD)
Glyma.03G159000.Wm82.a4.v1	(1 of 3) 3.1.1.26//3.1.1.3//3.1.1.32 - Galactolipase // Triacylglycerol lipase / Triglyceride lipase // Phospholipase A(1) / Phospholipase A1
Glyma.03G159800.Wm82.a4.v1	(1 of 3) PTHR31677//PTHR31677:SF17 - FAMILY NOT NAMED // ETHYLENE-RESPONSIVE TRANSCRIPTION FACTOR 10-RELATED
Glyma.03G163100.Wm82.a4.v1	(1 of 3) PTHR10641//PTHR10641:SF523 - MYB-LIKE DNA-BINDING PROTEIN MYB // SUBFAMILY NOT NAMED
Glyma.03G167800.Wm82.a4.v1	(1 of 3) PTHR24223:SF189 - ABC TRANSPORTER C FAMILY MEMBER 5
Glyma.03G168000.Wm82.a4.v1	(1 of 35) 3.6.3.25 - Sulfate-transporting ATPase
Glyma.03G168900.Wm82.a4.v1	(1 of 3) PTHR33271//PTHR33271:SF3 - FAMILY NOT NAMED // CUPIN DOMAIN-CONTAINING PROTEIN
Glyma.03G174500.Wm82.a4.v1	(1 of 49) PF12796//PF13962 - Ankyrin repeats (3 copies) (Ank_2) // Domain of unknown function (PGG)
Glyma.03G191100.Wm82.a4.v1	(1 of 4) PTHR10015//PTHR10015:SF164 - HEAT SHOCK TRANSCRIPTION FACTOR // HEAT STRESS TRANSCRIPTION FACTOR A-3
Glyma.03G201000.Wm82.a4.v1	(1 of 16) PTHR31415:SF4 - HARPIN-INDUCED PROTEIN-LIKE-RELATED
Glyma.03G202600.Wm82.a4.v1	(1 of 6) PTHR22849:SF38 - E3 UBIQUITIN-PROTEIN LIGASE PUB22-RELATED
Glyma.03G203600.Wm82.a4.v1	(1 of 4) PTHR31182//PTHR31182:SF2 - FAMILY NOT NAMED // F26K24.5 PROTEIN
Glyma.03G213500.Wm82.a4.v1	(1 of 2) K00949 - thiamine pyrophosphokinase (thiN, TPK1, THI80)
Glyma.03G217300.Wm82.a4.v1	(1 of 2) PTHR31875//PTHR31875:SF5 - FAMILY NOT NAMED // PROTEIN DEHYDRATION-INDUCED 19 HOMOLOG 2-RELATED
Glyma.03G218400.Wm82.a4.v1	(1 of 4) PTHR21493//PTHR21493:SF117 - CGI-141-RELATED/LIPASE CONTAINING PROTEIN // ALPHA/BETA-HYDROLASES SUPERFAMILY PROTEIN
Glyma.03G219200.Wm82.a4.v1	(1 of 2) K02210 - DNA replication licensing factor MCM7 (MCM7, CDC47)
Glyma.03G220800.Wm82.a4.v1	(1 of 4) PTHR31221//PTHR31221:SF23 - FAMILY NOT NAMED // WRKY TRANSCRIPTION FACTOR 23-RELATED
Glyma.03G226200.Wm82.a4.v1	(1 of 4) PTHR23339//PTHR23339:SF54 - TYROSINE SPECIFIC PROTEIN PHOSPHATASE AND DUAL SPECIFICITY PROTEIN PHOSPHATASE // PALADIN
Glyma.03G232500.Wm82.a4.v1	(1 of 19) PF07887 - Calmodulin binding protein-like (Calmodulin_bind)
Glyma.03G236300.Wm82.a4.v1	(1 of 4) PTHR11972:SF57 - RESPIRATORY BURST OXIDASE HOMOLOG PROTEIN B
Glyma.03G238900.Wm82.a4.v1	(1 of 7) PTHR24322//PTHR24322:SF566 - FAMILY NOT NAMED // GLUCOSE AND RIBITOL DEHYDROGENASE HOMOLOG 1-RELATED
Glyma.03G239800.Wm82.a4.v1	(1 of 4) PTHR22814:SF134 - COPPER-BINDING FAMILY PROTEIN-RELATED
Glyma.03G246000.Wm82.a4.v1	(1 of 4) PTHR21654//PTHR21654:SF22 - FAMILY NOT NAMED // TRIHELIX TRANSCRIPTION FACTOR GTL2
Glyma.03G248000.Wm82.a4.v1	(1 of 4) PTHR31358//PTHR31358:SF4 - FAMILY NOT NAMED // PROTEIN WAVE-DAMPENED 2-RELATED
Glyma.03G248800.Wm82.a4.v1	(1 of 26) PF04576 - Zein-binding (Zein-binding)
Glyma.03G257900.Wm82.a4.v1	(1 of 4) PTHR13683:SF308 - ASPARTYL PROTEASE-RELATED
Glyma.03G260300.Wm82.a4.v1	(1 of 3) PTHR31561//PTHR31561:SF1 - FAMILY NOT NAMED // 3-KETOACYL-COA SYNTHASE 1-RELATED
Glyma.03G262500.Wm82.a4.v1	(1 of 3) PTHR27000//PTHR27000:SF208 - FAMILY NOT NAMED // RECEPTOR LIKE PROTEIN 3-RELATED
Glyma.03G263000.Wm82.a4.v1	(1 of 5) PTHR14155//PTHR14155:SF99 - RING FINGER DOMAIN-CONTAINING // RING-H2 FINGER PROTEIN ATL3
Glyma.04G006200.Wm82.a4.v1	(1 of 4) PTHR34574//PTHR34574:SF2 - FAMILY NOT NAMED // EF-HAND CONTAINING PROTEIN-LIKE
Glyma.04G006900.Wm82.a4.v1	(1 of 155) K14488 - SAUR family protein (SAUR)
Glyma.04G008567.Wm82.a4.v1	(1 of 3) PTHR10209:SF107 - 2-OXOGLUTARATE (2OG) AND FE(II)-DEPENDENT OXYGENASE-LIKE PROTEIN-RELATED
Glyma.04G009100.Wm82.a4.v1	(1 of 4) PF00225//PF13920 - Kinesin motor domain (Kinesin) // Zinc finger, C3HC4 type (RING finger) (zf-C3HC4_3)
Glyma.04G009400.Wm82.a4.v1	(1 of 8) PF00257 - Dehydrin (Dehydrin)
Glyma.04G020700.Wm82.a4.v1	-
Glyma.04G026700.Wm82.a4.v1	(1 of 6) PTHR27000:SF26 - F10A5.16
Glyma.04G033300.Wm82.a4.v1	(1 of 7) PTHR10593//PTHR10593:SF31 - SERINE/THREONINE-PROTEIN KINASE RIO // C2H2-LIKE ZINC FINGER PROTEIN-RELATED
Glyma.04G034500.Wm82.a4.v1	(1 of 2) PTHR12313//PTHR12313:SF10 - RNF5 // SUBFAMILY NOT NAMED
Glyma.04G036700.Wm82.a4.v1	(1 of 3) PTHR10641//PTHR10641:SF611 - MYB-LIKE DNA-BINDING PROTEIN MYB // SUBFAMILY NOT NAMED
Glyma.04G040000.Wm82.a4.v1	(1 of 39) 2.3.1.133 - Shikimate O-hydroxycinnamoyltransferase
Glyma.04G040400.Wm82.a4.v1	(1 of 137) PF02458 - Transferase family (Transferase)
Glyma.04G041200.Wm82.a4.v1	(1 of 8) PTHR31729:SF0 - ETHYLENE-RESPONSIVE TRANSCRIPTION FACTOR ERF008-RELATED
Glyma.04G043100.Wm82.a4.v1	-
Glyma.04G050400.Wm82.a4.v1	(1 of 2) PTHR11108:SF4 - FERROCHELATASE-1, CHLOROPLASTIC/MITOCHONDRIAL
Glyma.04G050700.Wm82.a4.v1	(1 of 9) PTHR11034//PTHR11034:SF23 - N-MYC DOWNSTREAM REGULATED // N-MYC DOWNREGULATED-LIKE 3 PROTEIN
Glyma.04G051800.Wm82.a4.v1	(1 of 2) PTHR24089//PTHR24089:SF342 - FAMILY NOT NAMED // PROTEIN R07E3.4
Glyma.04G051900.Wm82.a4.v1	(1 of 4) PTHR10168:SF56 - GLUTAREDOXIN-C10-RELATED
Glyma.04G052200.Wm82.a4.v1	(1 of 111) PF00612 - IQ calmodulin-binding motif (IQ)
Glyma.04G058300.Wm82.a4.v1	(1 of 15) K11855 - ubiquitin carboxyl-terminal hydrolase 36/42 [EC:3.4.19.12] (USP36_42)
Glyma.04G066700.Wm82.a4.v1	(1 of 6) PTHR27002//PTHR27002:SF31 - FAMILY NOT NAMED // G-TYPE LECTIN S-RECEPTOR-LIKE SERINE/THREONINE-PROTEIN KINASE SD2-5
Glyma.04G069500.Wm82.a4.v1	(1 of 3) PTHR11453//PTHR11453:SF45 - ANION EXCHANGE PROTEIN // SUBFAMILY NOT NAMED
Glyma.04G069900.Wm82.a4.v1	(1 of 2) PTHR13832//PTHR13832:SF346 - PROTEIN PHOSPHATASE 2C // PROTEIN PHOSPHATASE 2C 22-RELATED
Glyma.04G075400.Wm82.a4.v1	(1 of 4) PTHR22937//PTHR22937:SF53 - RING FINGER CONTAINING PROTEIN // SUBFAMILY NOT NAMED
Glyma.04G082900.Wm82.a4.v1	(1 of 4) KOG1163 - Casein kinase (serine/threonine/tyrosine protein kinase)
Glyma.04G098100.Wm82.a4.v1	(1 of 17) K10664 - E3 ubiquitin-protein ligase ATL6/9/15/31/42/55 [EC:6.3.2.19] (ATL6S)
Glyma.04G099200.Wm82.a4.v1	-
Glyma.04G100300.Wm82.a4.v1	(1 of 7) PTHR31279//PTHR31279:SF3 - FAMILY NOT NAMED // (PHI-1) PROTEIN, PUTATIVE-RELATED
Glyma.04G118700.Wm82.a4.v1	(1 of 157) 3.1.1.11 - Pectinesterase / Pectin methylesterase
Glyma.04G130900.Wm82.a4.v1	(1 of 2) 2.3.1.47 - 8-amino-7-oxononanoate synthase / AONS
Glyma.04G136600.Wm82.a4.v1	(1 of 3) PF00036//PF13202//PF13833 - EF hand (EF-hand_1) // EF hand (EF-hand_5) // EF-hand domain pair (EF-hand_8)
Glyma.04G140400.Wm82.a4.v1	(1 of 4) 1.6.5.2//1.6.5.3 - NAD(P)H dehydrogenase (quinone) / Vitamin-K reductase // NADH:ubiquinone reductase (H(+)-translocating) / Ubiquinone reductase
Glyma.04G142400.Wm82.a4.v1	-
Glyma.04G149300.Wm82.a4.v1	(1 of 4) PTHR31561//PTHR31561:SF3 - FAMILY NOT NAMED // 3-KETOACYL-COA SYNTHASE 11
Glyma.04G156100.Wm82.a4.v1	(1 of 4) PTHR20855:SF47 - EXPRESSED PROTEIN
Glyma.04G175300.Wm82.a4.v1	(1 of 1) PF00036//PF06293//PF13499 - EF hand (EF-hand_1) // Lipopolysaccharide kinase (Kdo/WaaP) family (Kdo) // EF-hand domain pair (EF-hand_7)
Glyma.04G178500.Wm82.a4.v1	-
Glyma.04G183100.Wm82.a4.v1	(1 of 3) PTHR32263:SF6 - INACTIVE POLY [ADP-RIBOSE] POLYMERASE SRO4-RELATED
Glyma.04G200300.Wm82.a4.v1	(1 of 3) K14165 - atypical dual specificity phosphatase [EC:3.1.3.16 3.1.3.48] (K14165)
Glyma.04G203300.Wm82.a4.v1	(1 of 2) PTHR11638//PTHR11638:SF118 - ATP-DEPENDENT CLP PROTEASE // CHAPERONE PROTEIN CLPD, CHLOROPLASTIC
Glyma.04G205400.Wm82.a4.v1	(1 of 4) PTHR24343:SF161 - SERINE/THREONINE-PROTEIN KINASE SRK2J
Glyma.04G208200.Wm82.a4.v1	(1 of 1) 3.4.23.1//3.4.23.12 - Pepsin A / Pepsin // Nepenthesin / Nepenthes aspartic proteinase
Glyma.04G217300.Wm82.a4.v1	(1 of 3) K10807 - ribonucleoside-diphosphate reductase subunit M1 (RRM1)
Glyma.04G217400.Wm82.a4.v1	(1 of 349) PF00847 - AP2 domain (AP2)
Glyma.04G231800.Wm82.a4.v1	(1 of 6) PTHR19359:SF22 - CYTOCHROME B5 ISOFORM A
Glyma.04G238900.Wm82.a4.v1	(1 of 3) PF06017 - Unconventional myosin tail, actin- and lipid-binding (Myosin_TH1)
Glyma.04G245000.Wm82.a4.v1	(1 of 3) PTHR10891//PTHR10891:SF530 - EF-HAND CALCIUM-BINDING DOMAIN CONTAINING PROTEIN // SUBFAMILY NOT NAMED
Glyma.04G248700.Wm82.a4.v1	(1 of 5) PTHR13683:SF316 - ASPARTYL PROTEASE FAMILY PROTEIN-RELATED
Glyma.04G249000.Wm82.a4.v1	(1 of 4) PTHR31719//PTHR31719:SF3 - FAMILY NOT NAMED // GRAB1-LIKE PROTEIN
Glyma.05G007300.Wm82.a4.v1	-
Glyma.05G022200.Wm82.a4.v1	(1 of 4) PTHR11638//PTHR11638:SF116 - ATP-DEPENDENT CLP PROTEASE // SUBFAMILY NOT NAMED
Glyma.05G029200.Wm82.a4.v1	(1 of 3) 1.2.1.88//1.5.1.12 - L-glutamate gamma-semialdehyde dehydrogenase / Pyrroline-5-carboxylate dehydrogenase // Transferred entry: 1.2.1.88
Glyma.05G029300.Wm82.a4.v1	(1 of 2) PTHR37181//PTHR37181:SF1 - FAMILY NOT NAMED // F6A14.6 PROTEIN
Glyma.05G030400.Wm82.a4.v1	(1 of 6) PTHR11654:SF59 - PROTEIN NRT1/ PTR FAMILY 2.10-RELATED
Glyma.05G034600.Wm82.a4.v1	(1 of 19) PF07887 - Calmodulin binding protein-like (Calmodulin_bind)
Glyma.05G042800.Wm82.a4.v1	(1 of 399) PF00067 - Cytochrome P450 (p450)
Glyma.05G043900.Wm82.a4.v1	(1 of 4) PTHR24413//PTHR24413:SF75 - FAMILY NOT NAMED // BTB/POZ AND TAZ DOMAIN-CONTAINING PROTEIN 2
Glyma.05G045700.Wm82.a4.v1	(1 of 8) PTHR22880:SF156 - TRANSCRIPTION FACTOR GTE10
Glyma.05G049600.Wm82.a4.v1	(1 of 2) PTHR12329//PTHR12329:SF13 - BCL2-ASSOCIATED ATHANOGENE // SUBFAMILY NOT NAMED
Glyma.05G049900.Wm82.a4.v1	(1 of 3) PTHR31839//PTHR31839:SF0 - FAMILY NOT NAMED // DEHYDRATION-RESPONSIVE ELEMENT-BINDING PROTEIN 1E-RELATED
Glyma.05G052800.Wm82.a4.v1	(1 of 7) PTHR33593:SF2 - F5O11.5
Glyma.05G055100.Wm82.a4.v1	(1 of 100) PF14368 - Probable lipid transfer (LTP_2)
Glyma.05G059300.Wm82.a4.v1	(1 of 5) 2.4.1.186 - Glycogenin glucosyltransferase / Priming glucosyltransferase
Glyma.05G072300.Wm82.a4.v1	(1 of 3) PTHR31485//PTHR31485:SF7 - FAMILY NOT NAMED // PEPTIDYL SERINE ALPHA-GALACTOSYLTRANSFERASE
Glyma.05G079700.Wm82.a4.v1	(1 of 6) PTHR23050:SF153 - CALMODULIN-1-RELATED
Glyma.05G096500.Wm82.a4.v1	(1 of 4) PTHR31282//PTHR31282:SF33 - FAMILY NOT NAMED // WRKY TRANSCRIPTION FACTOR 15-RELATED
Glyma.05G097100.Wm82.a4.v1	(1 of 6) PTHR24006//PTHR24006:SF481 - FAMILY NOT NAMED // F-BOX PROTEIN SKIP2
Glyma.05G097300.Wm82.a4.v1	(1 of 4) PTHR10177:SF216 - CYCLIN-D3-2-RELATED
Glyma.05G098200.Wm82.a4.v1	(1 of 4) PTHR10641//PTHR10641:SF551 - MYB-LIKE DNA-BINDING PROTEIN MYB // MYB TRANSCRIPTION FACTOR
Glyma.05G101300.Wm82.a4.v1	(1 of 19) K14487 - auxin responsive GH3 gene family (GH3)
Glyma.05G107600.Wm82.a4.v1	(1 of 4) PTHR31096//PTHR31096:SF7 - FAMILY NOT NAMED // ACR1
Glyma.05G127600.Wm82.a4.v1	(1 of 2) PTHR31221//PTHR31221:SF19 - FAMILY NOT NAMED // WRKY TRANSCRIPTION FACTOR 28-RELATED
Glyma.05G132900.Wm82.a4.v1	(1 of 2) PF00122//PF00403//PF00702//PF12710 - E1-E2 ATPase (E1-E2_ATPase) // Heavy-metal-associated domain (HMA) // haloacid dehalogenase-like hydrolase (Hydrolase) // haloacid dehalogenase-like hydrolase (HAD)
Glyma.05G133700.Wm82.a4.v1	(1 of 3) PTHR33734:SF5 - LYSM DOMAIN-CONTAINING GPI-ANCHORED PROTEIN 2
Glyma.05G139500.Wm82.a4.v1	(1 of 2227) 2.7.11.1 - Non-specific serine/threonine protein kinase / Threonine-specific protein kinase
Glyma.05G143500.Wm82.a4.v1	(1 of 40) PF03763 - Remorin, C-terminal region (Remorin_C)
Glyma.05G161600.Wm82.a4.v1	(1 of 8) PTHR11260//PTHR11260:SF233 - GLUTATHIONE S-TRANSFERASE, GST, SUPERFAMILY, GST DOMAIN CONTAINING // SUBFAMILY NOT NAMED
Glyma.05G162100.Wm82.a4.v1	(1 of 4) PTHR23315:SF76 - U-BOX DOMAIN-CONTAINING PROTEIN 17
Glyma.05G166900.Wm82.a4.v1	(1 of 129) KOG0157 - Cytochrome P450 CYP4/CYP19/CYP26 subfamilies
Glyma.05G168300.Wm82.a4.v1	(1 of 2) PTHR18896//PTHR18896:SF71 - PHOSPHOLIPASE D // SUBFAMILY NOT NAMED
Glyma.05G174900.Wm82.a4.v1	-
Glyma.05G178200.Wm82.a4.v1	(1 of 2) PTHR23335//PTHR23335:SF0 - CALMODULIN-BINDING TRANSCRIPTION ACTIVATOR CAMTA // CALMODULIN-BINDING TRANSCRIPTION ACTIVATOR, ISOFORM F
Glyma.05G180200.Wm82.a4.v1	(1 of 31) PF04783 - Protein of unknown function (DUF630) (DUF630)
Glyma.05G186000.Wm82.a4.v1	(1 of 5) PTHR21677 - CRAMPED PROTEIN
Glyma.05G186700.Wm82.a4.v1	(1 of 349) PF00847 - AP2 domain (AP2)
Glyma.05G189600.Wm82.a4.v1	(1 of 3) PTHR22849//PTHR22849:SF20 - WDSAM1 PROTEIN // SUBFAMILY NOT NAMED
Glyma.05G191700.Wm82.a4.v1	(1 of 6) PTHR24361//PTHR24361:SF310 - MITOGEN-ACTIVATED KINASE KINASE KINASE // MITOGEN-ACTIVATED PROTEIN KINASE KINASE KINASE 3
Glyma.05G193200.Wm82.a4.v1	(1 of 4) PTHR10108//PTHR10108:SF926 - METHYLTRANSFERASE // SUBFAMILY NOT NAMED
Glyma.05G194350.Wm82.a4.v1	(1 of 5) PTHR21493//PTHR21493:SF130 - CGI-141-RELATED/LIPASE CONTAINING PROTEIN // SUBFAMILY NOT NAMED
Glyma.05G195000.Wm82.a4.v1	(1 of 3) PTHR31719//PTHR31719:SF16 - FAMILY NOT NAMED // NAC DOMAIN-CONTAINING PROTEIN 2
Glyma.05G195100.Wm82.a4.v1	(1 of 4) PTHR13683//PTHR13683:SF227 - ASPARTYL PROTEASES // ASPARTYL PROTEASE FAMILY PROTEIN
Glyma.05G197000.Wm82.a4.v1	(1 of 20) PF01823 - MAC/Perforin domain (MACPF)
Glyma.05G200101.Wm82.a4.v1	-
Glyma.05G209000.Wm82.a4.v1	(1 of 2) PTHR14499:SF11 - PROTEIN VM106R.1
Glyma.05G209100.Wm82.a4.v1	-
Glyma.05G215900.Wm82.a4.v1	(1 of 176) PF03106 - WRKY DNA -binding domain (WRKY)
Glyma.05G218500.Wm82.a4.v1	(1 of 2) PTHR10857//PTHR10857:SF54 - COPINE // DCD (DEVELOPMENT AND CELL DEATH) DOMAIN PROTEIN
Glyma.05G232500.Wm82.a4.v1	(1 of 5) PTHR10992//PTHR10992:SF841 - ALPHA/BETA HYDROLASE FOLD-CONTAINING PROTEIN // SUBFAMILY NOT NAMED
Glyma.05G233300.Wm82.a4.v1	(1 of 10) PTHR31086:SF20 - ALUMINUM-ACTIVATED MALATE TRANSPORTER 4-RELATED
Glyma.05G236400.Wm82.a4.v1	(1 of 2) PTHR22298//PTHR22298:SF28 - ENDO-1,4-BETA-GLUCANASE // ENDOGLUCANASE 4-RELATED
Glyma.05G237500.Wm82.a4.v1	(1 of 6) K16276 - zinc finger protein-like protein (K16276, BTS)
Glyma.05G238200.Wm82.a4.v1	-
Glyma.05G245600.Wm82.a4.v1	(1 of 10) PTHR10891:SF573 - CALCIUM-BINDING PROTEIN CML24-RELATED
Glyma.06G001032.Wm82.a4.v1	(1 of 3) 1.23.1.1//1.23.1.4 - (+)-pinoresinol reductase / Pinoresinol/lariciresinol reductase // (-)-lariciresinol reductase / Pinoresinol/lariciresinol reductase
Glyma.06G004700.Wm82.a4.v1	(1 of 2) PTHR23315:SF101 - ARMADILLO REPEAT ONLY 1 PROTEIN
Glyma.06G014600.Wm82.a4.v1	(1 of 2) PTHR31500:SF0 - AT HOOK MOTIF DNA-BINDING FAMILY PROTEIN
Glyma.06G018700.Wm82.a4.v1	-
Glyma.06G023400.Wm82.a4.v1	(1 of 10) PF15365 - Proline-rich nuclear receptor coactivator (PNRC)
Glyma.06G024000.Wm82.a4.v1	(1 of 30) PF05003//PF11961 - Protein of unknown function (DUF668) (DUF668) // Domain of unknown function (DUF3475) (DUF3475)
Glyma.06G033300.Wm82.a4.v1	(1 of 7) PTHR10593//PTHR10593:SF31 - SERINE/THREONINE-PROTEIN KINASE RIO // C2H2-LIKE ZINC FINGER PROTEIN-RELATED
Glyma.06G035300.Wm82.a4.v1	(1 of 150) KOG0156 - Cytochrome P450 CYP2 subfamily
Glyma.06G036300.Wm82.a4.v1	(1 of 2) K13963 - serpin B (SERPINB)
Glyma.06G036700.Wm82.a4.v1	(1 of 3) PTHR34052:SF1 - AUXIN RESPONSE FACTOR 30-RELATED
Glyma.06G042100.Wm82.a4.v1	(1 of 8) PTHR31729:SF0 - ETHYLENE-RESPONSIVE TRANSCRIPTION FACTOR ERF008-RELATED
Glyma.06G042300.Wm82.a4.v1	(1 of 4) PTHR12864//PTHR12864:SF23 - RAN BINDING PROTEIN 9-RELATED // SUBFAMILY NOT NAMED
Glyma.06G045900.Wm82.a4.v1	(1 of 4) PTHR23315//PTHR23315:SF64 - BETA CATENIN-RELATED ARMADILLO REPEAT-CONTAINING // ARM REPEAT SUPERFAMILY PROTEIN-RELATED
Glyma.06G046300.Wm82.a4.v1	(1 of 4) PTHR12354 - INTERFERON-RELATED DEVELOPMENTAL REGULATOR
Glyma.06G046400.Wm82.a4.v1	(1 of 2) K10570 - DNA excision repair protein ERCC-8 (ERCC8, CKN1, CSA)
Glyma.06G050500.Wm82.a4.v1	-
Glyma.06G052800.Wm82.a4.v1	-
Glyma.06G053200.Wm82.a4.v1	(1 of 11) K03257 - translation initiation factor 4A (EIF4A)
Glyma.06G060200.Wm82.a4.v1	(1 of 3) PTHR21266//PTHR21266:SF29 - IRON-SULFUR DOMAIN CONTAINING PROTEIN // PROTEIN TIC 55, CHLOROPLASTIC
Glyma.06G060600.Wm82.a4.v1	(1 of 90) PF12776 - Myb/SANT-like DNA-binding domain (Myb_DNA-bind_3)
Glyma.06G061700.Wm82.a4.v1	(1 of 4) PTHR21145//PTHR21145:SF1 - CHORISMATE MUTASE // CHORISMATE MUTASE 2
Glyma.06G061900.Wm82.a4.v1	(1 of 8) PTHR31429:SF3 - WRKY TRANSCRIPTION FACTOR 40-RELATED
Glyma.06G062000.Wm82.a4.v1	(1 of 176) PF03106 - WRKY DNA -binding domain (WRKY)
Glyma.06G063900.Wm82.a4.v1	(1 of 30) PF05910 - Plant protein of unknown function (DUF868) (DUF868)
Glyma.06G067000.Wm82.a4.v1	(1 of 4) PTHR31731//PTHR31731:SF19 - FAMILY NOT NAMED // BIFUNCTIONAL INHIBITOR/LIPID-TRANSFER PROTEIN/SEED STORAGE 2S ALBUMIN SUPERFAMILY PROTEIN
Glyma.06G068000.Wm82.a4.v1	-
Glyma.06G071900.Wm82.a4.v1	(1 of 2) PTHR13832//PTHR13832:SF346 - PROTEIN PHOSPHATASE 2C // PROTEIN PHOSPHATASE 2C 22-RELATED
Glyma.06G074300.Wm82.a4.v1	(1 of 4) PTHR21319:SF15 - CHY AND CTCHY AND RING-TYPE ZINC FINGER PROTEIN
Glyma.06G076600.Wm82.a4.v1	(1 of 4) PTHR22937//PTHR22937:SF53 - RING FINGER CONTAINING PROTEIN // SUBFAMILY NOT NAMED
Glyma.06G086400.Wm82.a4.v1	(1 of 4) PTHR10071//PTHR10071:SF196 - TRANSCRIPTION FACTOR GATA GATA BINDING FACTOR // SUBFAMILY NOT NAMED
Glyma.06G087100.Wm82.a4.v1	(1 of 3) PTHR11614:SF96 - ALPHA/BETA FOLD HYDROLASE FAMILY PROTEIN
Glyma.06G090900.Wm82.a4.v1	(1 of 1) PTHR22952//PTHR22952:SF199 - CAMP-RESPONSE ELEMENT BINDING PROTEIN-RELATED // SUBFAMILY NOT NAMED
Glyma.06G100900.Wm82.a4.v1	-
Glyma.06G105600.Wm82.a4.v1	(1 of 5) K01834 - 2,3-bisphosphoglycerate-dependent phosphoglycerate mutase (PGAM, gpmA)
Glyma.06G113100.Wm82.a4.v1	-
Glyma.06G114000.Wm82.a4.v1	(1 of 4) PTHR31719//PTHR31719:SF3 - FAMILY NOT NAMED // GRAB1-LIKE PROTEIN
Glyma.06G114200.Wm82.a4.v1	(1 of 5) PTHR13683:SF316 - ASPARTYL PROTEASE FAMILY PROTEIN-RELATED
Glyma.06G116300.Wm82.a4.v1	(1 of 1) PTHR12383//PTHR12383:SF24 - PROTEASE FAMILY S26 MITOCHONDRIAL INNER MEMBRANE PROTEASE-RELATED // SUBFAMILY NOT NAMED
Glyma.06G119700.Wm82.a4.v1	(1 of 3) PTHR13856//PTHR13856:SF95 - VHS DOMAIN CONTAINING PROTEIN FAMILY // F24J8.3 PROTEIN
Glyma.06G138100.Wm82.a4.v1	(1 of 10) PTHR31989//PTHR31989:SF5 - FAMILY NOT NAMED // F11O4.3-RELATED
Glyma.06G148400.Wm82.a4.v1	(1 of 349) PF00847 - AP2 domain (AP2)
Glyma.06G149900.Wm82.a4.v1	(1 of 47) KOG4282 - Transcription factor GT-2 and related proteins, contains trihelix DNA-binding/SANT domain
Glyma.06G157400.Wm82.a4.v1	(1 of 4) PTHR31719//PTHR31719:SF3 - FAMILY NOT NAMED // GRAB1-LIKE PROTEIN
Glyma.06G162200.Wm82.a4.v1	(1 of 2) PTHR11638//PTHR11638:SF118 - ATP-DEPENDENT CLP PROTEASE // CHAPERONE PROTEIN CLPD, CHLOROPLASTIC
Glyma.06G166100.Wm82.a4.v1	(1 of 4) PF13915 - Domain of unknown function (DUF4210) (DUF4210)
Glyma.06G171100.Wm82.a4.v1	-
Glyma.06G171150.Wm82.a4.v1	(1 of 7) PTHR10891//PTHR10891:SF590 - EF-HAND CALCIUM-BINDING DOMAIN CONTAINING PROTEIN // SUBFAMILY NOT NAMED
Glyma.06G186300.Wm82.a4.v1	(1 of 2) 1.2.1.19//1.2.1.8 - Aminobutyraldehyde dehydrogenase / Gamma-guanidinobutyraldehyde dehydrogenase // Betaine-aldehyde dehydrogenase / Betaine aldehyde oxidase
Glyma.06G188900.Wm82.a4.v1	(1 of 2) 1.1.5.2 - Quinoprotein glucose dehydrogenase (PQQ, quinone) / Quinoprotein D-glucose dehydrogenase
Glyma.06G192400.Wm82.a4.v1	(1 of 3) PTHR31707:SF42 - PECTINESTERASE 1-RELATED
Glyma.06G206700.Wm82.a4.v1	(1 of 1) PTHR11926//PTHR11926:SF253 - GLUCOSYL/GLUCURONOSYL TRANSFERASES // UDP-GLYCOSYLTRANSFERASE 89B1
Glyma.06G214800.Wm82.a4.v1	(1 of 4) PTHR31561//PTHR31561:SF3 - FAMILY NOT NAMED // 3-KETOACYL-COA SYNTHASE 11
Glyma.06G227500.Wm82.a4.v1	(1 of 16) PF04859 - Plant protein of unknown function (DUF641) (DUF641)
Glyma.06G229900.Wm82.a4.v1	(1 of 9) K01595 - phosphoenolpyruvate carboxylase (ppc)
Glyma.06G234200.Wm82.a4.v1	(1 of 3) 1.13.11.5 - Homogentisate 1,2-dioxygenase / Homogentisicase
Glyma.06G235500.Wm82.a4.v1	(1 of 5) K00815 - tyrosine aminotransferase (TAT)
Glyma.06G238200.Wm82.a4.v1	(1 of 4) PTHR13832:SF333 - PROTEIN PHOSPHATASE 2C 39-RELATED
Glyma.06G248900.Wm82.a4.v1	(1 of 4) PTHR31719:SF34 - NAC DOMAIN-CONTAINING PROTEIN 19-RELATED
Glyma.06G249600.Wm82.a4.v1	-
Glyma.06G265500.Wm82.a4.v1	(1 of 111) PF03514 - GRAS domain family (GRAS)
Glyma.06G270500.Wm82.a4.v1	(1 of 3) PTHR11886:SF22 - DYNEIN LIGHT CHAIN TYPE 1 FAMILY PROTEIN
Glyma.06G293200.Wm82.a4.v1	-
Glyma.06G295400.Wm82.a4.v1	-
Glyma.06G300100.Wm82.a4.v1	(1 of 10) PTHR10641//PTHR10641:SF584 - MYB-LIKE DNA-BINDING PROTEIN MYB // SUBFAMILY NOT NAMED
Glyma.06G307200.Wm82.a4.v1	(1 of 6) PTHR12701//PTHR12701:SF18 - BCR-ASSOCIATED PROTEIN, BAP // 4D656-RELATED
Glyma.06G307600.Wm82.a4.v1	(1 of 3) PTHR24361//PTHR24361:SF380 - MITOGEN-ACTIVATED KINASE KINASE KINASE // MITOGEN-ACTIVATED PROTEIN KINASE KINASE KINASE 17-RELATED
Glyma.06G307700.Wm82.a4.v1	(1 of 176) PF03106 - WRKY DNA -binding domain (WRKY)
Glyma.06G319300.Wm82.a4.v1	(1 of 157) 3.1.1.11 - Pectinesterase / Pectin methylesterase
Glyma.06G319640.Wm82.a4.v1	(1 of 2) PTHR27000:SF52 - LEUCINE-RICH REPEAT (LRR) FAMILY PROTEIN-RELATED
Glyma.07G005200.Wm82.a4.v1	(1 of 9) K10393 - kinesin family member 2/24 (KIF2_24, MCAK)
Glyma.07G008400.Wm82.a4.v1	(1 of 111) PF00612 - IQ calmodulin-binding motif (IQ)
Glyma.07G010200.Wm82.a4.v1	(1 of 4) PTHR11649:SF62 - PROTEIN SEY1 HOMOLOG
Glyma.07G019100.Wm82.a4.v1	(1 of 2) K18660 - malonyl-CoA/methylmalonyl-CoA synthetase (ACSF3)
Glyma.07G021300.Wm82.a4.v1	-
Glyma.07G023300.Wm82.a4.v1	(1 of 8) PTHR31429:SF3 - WRKY TRANSCRIPTION FACTOR 40-RELATED
Glyma.07G032850.Wm82.a4.v1	(1 of 5) 4.1.99.13 - (6-4)DNA photolyase / DNA photolyase
Glyma.07G035200.Wm82.a4.v1	(1 of 5) PTHR23213//PTHR23213:SF177 - FORMIN-RELATED // FORMIN-LIKE PROTEIN 11
Glyma.07G037400.Wm82.a4.v1	(1 of 2) PTHR10887//PTHR10887:SF359 - DNA2/NAM7 HELICASE FAMILY // HELICASE SEN1
Glyma.07G039900.Wm82.a4.v1	(1 of 5) PTHR11771//PTHR11771:SF38 - LIPOXYGENASE // LIPOXYGENASE 3, CHLOROPLASTIC-RELATED
Glyma.07G045967.Wm82.a4.v1	(1 of 3) PTHR31707:SF42 - PECTINESTERASE 1-RELATED
Glyma.07G048200.Wm82.a4.v1	(1 of 4) PTHR31140//PTHR31140:SF4 - FAMILY NOT NAMED // B3 DOMAIN-CONTAINING TRANSCRIPTION FACTOR NGA1-RELATED
Glyma.07G050900.Wm82.a4.v1	(1 of 8) 1.1.3.37//1.1.3.8 - D-arabinono-1,4-lactone oxidase / D-arabinono-gamma-lactone oxidase // L-gulonolactone oxidase / L-gulono-gamma-lactone oxidase
Glyma.07G052566.Wm82.a4.v1	(1 of 6) PTHR33472//PTHR33472:SF1 - FAMILY NOT NAMED // EXTENSIN-RELATED
Glyma.07G055800.Wm82.a4.v1	(1 of 4) PTHR23130:SF97 - CYTOCHROME B561/FERRIC REDUCTASE TRANSMEMBRANE WITH DOMON RELATED DOMAIN
Glyma.07G060400.Wm82.a4.v1	(1 of 5) PTHR22952:SF144 - G-BOX-BINDING FACTOR 2-RELATED
Glyma.07G062600.Wm82.a4.v1	(1 of 6) PTHR10994:SF70 - RETICULON-LIKE PROTEIN B4
Glyma.07G064600.Wm82.a4.v1	(1 of 1) PTHR20881//PTHR20881:SF0 - 3-METHYL-2-OXOBUTANOATE HYDROXYMETHYLTRANSFERASE // 3-METHYL-2-OXOBUTANOATE HYDROXYMETHYLTRANSFERASE
Glyma.07G071300.Wm82.a4.v1	(1 of 4) K01068 - acyl-coenzyme A thioesterase 1/2/4 (ACOT1_2_4)
Glyma.07G072500.Wm82.a4.v1	(1 of 4) PTHR10024//PTHR10024:SF219 - SYNAPTOTAGMIN // SUBFAMILY NOT NAMED
Glyma.07G074300.Wm82.a4.v1	(1 of 7) PTHR24078//PTHR24078:SF207 - DNAJ HOMOLOG SUBFAMILY C MEMBER // PROTEIN DNJ-19
Glyma.07G076600.Wm82.a4.v1	(1 of 17) PTHR32246:SF20 - BON1-ASSOCIATED PROTEIN 1-RELATED
Glyma.07G080300.Wm82.a4.v1	(1 of 4) PTHR31072//PTHR31072:SF10 - FAMILY NOT NAMED // TRANSCRIPTION FACTOR TCP9
Glyma.07G087200.Wm82.a4.v1	(1 of 5) PTHR33374//PTHR33374:SF6 - FAMILY NOT NAMED // ARABINOGALACTAN PEPTIDE 16-RELATED
Glyma.07G088350.Wm82.a4.v1	-
Glyma.07G090400.Wm82.a4.v1	(1 of 8) PF00257 - Dehydrin (Dehydrin)
Glyma.07G095900.Wm82.a4.v1	(1 of 6) PF00069//PF13947//PF14380 - Protein kinase domain (Pkinase) // Wall-associated receptor kinase galacturonan-binding (GUB_WAK_bind) // Wall-associated receptor kinase C-terminal (WAK_assoc)
Glyma.07G108900.Wm82.a4.v1	(1 of 2) PTHR10071:SF172 - GATA TRANSCRIPTION FACTOR 2
Glyma.07G125800.Wm82.a4.v1	(1 of 9) PF06219 - Protein of unknown function (DUF1005) (DUF1005)
Glyma.07G129400.Wm82.a4.v1	(1 of 1) K15326 - tRNA-splicing endonuclease subunit Sen54 (TSEN54)
Glyma.07G133800.Wm82.a4.v1	-
Glyma.07G139700.Wm82.a4.v1	(1 of 11) PTHR11260//PTHR11260:SF314 - GLUTATHIONE S-TRANSFERASE, GST, SUPERFAMILY, GST DOMAIN CONTAINING // SUBFAMILY NOT NAMED
Glyma.07G139800.Wm82.a4.v1	(1 of 11) PTHR11260//PTHR11260:SF314 - GLUTATHIONE S-TRANSFERASE, GST, SUPERFAMILY, GST DOMAIN CONTAINING // SUBFAMILY NOT NAMED
Glyma.07G140100.Wm82.a4.v1	(1 of 11) PTHR11260//PTHR11260:SF314 - GLUTATHIONE S-TRANSFERASE, GST, SUPERFAMILY, GST DOMAIN CONTAINING // SUBFAMILY NOT NAMED
Glyma.07G140551.Wm82.a4.v1	(1 of 7) PTHR11260//PTHR11260:SF303 - GLUTATHIONE S-TRANSFERASE, GST, SUPERFAMILY, GST DOMAIN CONTAINING // GLUTATHIONE S-TRANSFERASE U1-RELATED
Glyma.07G141500.Wm82.a4.v1	(1 of 5) PTHR33122:SF4 - BIFUNCTIONAL INHIBITOR/LIPID-TRANSFER PROTEIN/SEED STORAGE 2S ALBUMIN-LIKE PROTEIN
Glyma.07G150900.Wm82.a4.v1	(1 of 8) 1.14.11.23 - Flavonol synthase / FLS
Glyma.07G151300.Wm82.a4.v1	(1 of 5) 1.14.99.33 - Delta(12)-fatty acid dehydrogenase / Linoleate Delta-12-fatty acid acetylenase (desaturase)
Glyma.07G184700.Wm82.a4.v1	(1 of 6) 1.2.1.70 - Glutamyl-tRNA reductase
Glyma.07G189300.Wm82.a4.v1	(1 of 5) PTHR10641:SF586 - MYB TRANSCRIPTION FACTOR-RELATED
Glyma.07G189500.Wm82.a4.v1	(1 of 2) PTHR23500:SF55 - SUGAR TRANSPORT PROTEIN 1-RELATED
Glyma.07G190100.Wm82.a4.v1	-
Glyma.07G190700.Wm82.a4.v1	(1 of 19) PF07887 - Calmodulin binding protein-like (Calmodulin_bind)
Glyma.07G192500.Wm82.a4.v1	(1 of 1) 2.7.11.17//3.6.4.12 - Calcium/calmodulin-dependent protein kinase / Microtubule-associated protein 2 kinase // DNA helicase
Glyma.07G199800.Wm82.a4.v1	(1 of 2) PTHR33199//PTHR33199:SF8 - FAMILY NOT NAMED // MACPF DOMAIN-CONTAINING PROTEIN NSL1
Glyma.07G199900.Wm82.a4.v1	(1 of 3) PTHR10666//PTHR10666:SF150 - UBIQUITIN // POLYUBIQUITIN 3
Glyma.07G212300.Wm82.a4.v1	(1 of 4) PF08553 - VID27 cytoplasmic protein (VID27)
Glyma.07G212400.Wm82.a4.v1	(1 of 349) PF00847 - AP2 domain (AP2)
Glyma.07G213700.Wm82.a4.v1	(1 of 2) PTHR10438//PTHR10438:SF233 - THIOREDOXIN // SUBFAMILY NOT NAMED
Glyma.07G214300.Wm82.a4.v1	(1 of 2) PTHR22849//PTHR22849:SF52 - WDSAM1 PROTEIN // E3 UBIQUITIN-PROTEIN LIGASE PUB24-RELATED
Glyma.07G215400.Wm82.a4.v1	(1 of 4) PTHR11911//PTHR11911:SF109 - INOSINE-5-MONOPHOSPHATE DEHYDROGENASE RELATED // SUBFAMILY NOT NAMED
Glyma.07G215500.Wm82.a4.v1	(1 of 3) 2.4.1.263 - Abscisate beta-glucosyltransferase / ABA-GTase
Glyma.07G235500.Wm82.a4.v1	(1 of 273) PF00646 - F-box domain (F-box)
Glyma.07G238000.Wm82.a4.v1	(1 of 4) PTHR31221//PTHR31221:SF13 - FAMILY NOT NAMED // WRKY TRANSCRIPTION FACTOR 48-RELATED
Glyma.07G246700.Wm82.a4.v1	-
Glyma.07G248000.Wm82.a4.v1	(1 of 3) PTHR13832:SF309 - PROTEIN PHOSPHATASE 2C 40-RELATED
Glyma.07G248600.Wm82.a4.v1	(1 of 191) PF00168 - C2 domain (C2)
Glyma.07G253400.Wm82.a4.v1	(1 of 10) PF15365 - Proline-rich nuclear receptor coactivator (PNRC)
Glyma.07G254900.Wm82.a4.v1	(1 of 7) 2.4.1.128 - Scopoletin glucosyltransferase
Glyma.07G260100.Wm82.a4.v1	(1 of 28) PF04520 - Senescence regulator (Senescence_reg)
Glyma.07G263300.Wm82.a4.v1	(1 of 6) PTHR13018//PTHR13018:SF47 - PROBABLE MEMBRANE PROTEIN DUF221-RELATED // ERD (EARLY-RESPONSIVE TO DEHYDRATION STRESS) FAMILY PROTEIN-RELATED
Glyma.07G266500.Wm82.a4.v1	(1 of 4) PTHR31636:SF45 - SCARECROW-LIKE PROTEIN 13
Glyma.08G002100.Wm82.a4.v1	(1 of 5) PTHR21493//PTHR21493:SF130 - CGI-141-RELATED/LIPASE CONTAINING PROTEIN // SUBFAMILY NOT NAMED
Glyma.08G005100.Wm82.a4.v1	(1 of 4) PTHR24343:SF161 - SERINE/THREONINE-PROTEIN KINASE SRK2J
Glyma.08G015700.Wm82.a4.v1	(1 of 2) PTHR14499:SF11 - PROTEIN VM106R.1
Glyma.08G018000.Wm82.a4.v1	(1 of 3) PTHR11751//PTHR11751:SF380 - SUBGROUP I AMINOTRANSFERASE RELATED // 1-AMINOCYCLOPROPANE-1-CARBOXYLATE SYNTHASE 2-RELATED
Glyma.08G018800.Wm82.a4.v1	(1 of 4) PTHR31087:SF14 - PROTEIN LURP-ONE-RELATED 17
Glyma.08G018900.Wm82.a4.v1	(1 of 2) PTHR11972//PTHR11972:SF81 - NADPH OXIDASE // SUBFAMILY NOT NAMED
Glyma.08G022900.Wm82.a4.v1	(1 of 2) PF13639//PF13947 - Ring finger domain (zf-RING_2) // Wall-associated receptor kinase galacturonan-binding (GUB_WAK_bind)
Glyma.08G023100.Wm82.a4.v1	(1 of 4) PTHR10366//PTHR10366:SF308 - NAD DEPENDENT EPIMERASE/DEHYDRATASE // SUBFAMILY NOT NAMED
Glyma.08G024600.Wm82.a4.v1	(1 of 2) PTHR10857//PTHR10857:SF54 - COPINE // DCD (DEVELOPMENT AND CELL DEATH) DOMAIN PROTEIN
Glyma.08G032900.Wm82.a4.v1	(1 of 1) PTHR11528:SF48 - HEAT SHOCK PROTEIN 90-2-RELATED
Glyma.08G034500.Wm82.a4.v1	-
Glyma.08G035000.Wm82.a4.v1	(1 of 70) K09286 - EREBP-like factor (EREBP)
Glyma.08G037900.Wm82.a4.v1	(1 of 4) PTHR11886//PTHR11886:SF47 - DYNEIN LIGHT CHAIN // SUBFAMILY NOT NAMED
Glyma.08G039600.Wm82.a4.v1	(1 of 4) PTHR23180:SF200 - ARF-GAP DOMAIN AND FG REPEAT-CONTAINING PROTEIN 1
Glyma.08G042100.Wm82.a4.v1	(1 of 2) PTHR10641//PTHR10641:SF510 - MYB-LIKE DNA-BINDING PROTEIN MYB // SUBFAMILY NOT NAMED
Glyma.08G042900.Wm82.a4.v1	(1 of 2) K14011 - UBX domain-containing protein 6 (UBXN6, UBXD1)
Glyma.08G045200.Wm82.a4.v1	(1 of 4) PTHR12629:SF4 - NUDIX HYDROLASE 17, MITOCHONDRIAL-RELATED
Glyma.08G053500.Wm82.a4.v1	(1 of 10) PTHR10891:SF573 - CALCIUM-BINDING PROTEIN CML24-RELATED
Glyma.08G056200.Wm82.a4.v1	(1 of 16) PF05542 - Protein of unknown function (DUF760) (DUF760)
Glyma.08G056600.Wm82.a4.v1	(1 of 2) PTHR11614//PTHR11614:SF97 - PHOSPHOLIPASE-RELATED // SUBFAMILY NOT NAMED
Glyma.08G058800.Wm82.a4.v1	(1 of 2) K00861 - riboflavin kinase (RFK, FMN1)
Glyma.08G058900.Wm82.a4.v1	-
Glyma.08G070300.Wm82.a4.v1	-
Glyma.08G071300.Wm82.a4.v1	(1 of 4) PTHR31279//PTHR31279:SF12 - FAMILY NOT NAMED // PHI-1-LIKE PROTEIN
Glyma.08G072200.Wm82.a4.v1	(1 of 5) K17893 - ubiquinol oxidase (AOX1, AOX2)
Glyma.08G077400.Wm82.a4.v1	(1 of 4) PTHR22952//PTHR22952:SF175 - CAMP-RESPONSE ELEMENT BINDING PROTEIN-RELATED // SUBFAMILY NOT NAMED
Glyma.08G081700.Wm82.a4.v1	(1 of 28) PF07712 - Stress up-regulated Nod 19 (SURNod19)
Glyma.08G082400.Wm82.a4.v1	(1 of 2) PTHR31221//PTHR31221:SF19 - FAMILY NOT NAMED // WRKY TRANSCRIPTION FACTOR 28-RELATED
Glyma.08G083300.Wm82.a4.v1	(1 of 3) K13420 - LRR receptor-like serine/threonine-protein kinase FLS2 (FLS2)
Glyma.08G099900.Wm82.a4.v1	(1 of 40) PF03763 - Remorin, C-terminal region (Remorin_C)
Glyma.08G108600.Wm82.a4.v1	(1 of 2) PTHR10015:SF157 - HEAT STRESS TRANSCRIPTION FACTOR A-5
Glyma.08G108800.Wm82.a4.v1	(1 of 3) 3.3.1.1 - Adenosylhomocysteinase / SAHase
Glyma.08G114400.Wm82.a4.v1	(1 of 2) PTHR21266:SF25 - PROTOCHLOROPHYLLIDE-DEPENDENT TRANSLOCON COMPONENT 52, CHLOROPLASTIC
Glyma.08G118900.Wm82.a4.v1	(1 of 1) PF00043//PF13417//PF13456 - Glutathione S-transferase, C-terminal domain (GST_C) // Glutathione S-transferase, N-terminal domain (GST_N_3) // Reverse transcriptase-like (RVT_3)
Glyma.08G119000.Wm82.a4.v1	(1 of 9) PTHR23155//PTHR23155:SF646 - LEUCINE-RICH REPEAT-CONTAINING PROTEIN // SUBFAMILY NOT NAMED
Glyma.08G119700.Wm82.a4.v1	(1 of 4) PTHR23315:SF76 - U-BOX DOMAIN-CONTAINING PROTEIN 17
Glyma.08G132300.Wm82.a4.v1	(1 of 4) PTHR12224//PTHR12224:SF2 - BETA-1,4-MANNOSYL-GLYCOPROTEIN BETA-1,4-N-ACETYLGLUCOSAMINYL-TRANSFERASE // SUBFAMILY NOT NAMED
Glyma.08G134900.Wm82.a4.v1	(1 of 273) PF00646 - F-box domain (F-box)
Glyma.08G135200.Wm82.a4.v1	(1 of 2) PTHR23335//PTHR23335:SF0 - CALMODULIN-BINDING TRANSCRIPTION ACTIVATOR CAMTA // CALMODULIN-BINDING TRANSCRIPTION ACTIVATOR, ISOFORM F
Glyma.08G144600.Wm82.a4.v1	(1 of 5) PTHR21677 - CRAMPED PROTEIN
Glyma.08G145300.Wm82.a4.v1	(1 of 349) PF00847 - AP2 domain (AP2)
Glyma.08G147200.Wm82.a4.v1	(1 of 3) PTHR22849//PTHR22849:SF20 - WDSAM1 PROTEIN // SUBFAMILY NOT NAMED
Glyma.08G153700.Wm82.a4.v1	-
Glyma.08G165700.Wm82.a4.v1	(1 of 8) K08066 - nuclear transcription factor Y, gamma (NFYC)
Glyma.08G168300.Wm82.a4.v1	(1 of 155) K14488 - SAUR family protein (SAUR)
Glyma.08G171400.Wm82.a4.v1	(1 of 11) PTHR31568:SF17 - EXPRESSED PROTEIN
Glyma.08G176300.Wm82.a4.v1	(1 of 2) PTHR10543//PTHR10543:SF26 - BETA-CAROTENE DIOXYGENASE // 9-CIS-EPOXYCAROTENOID DIOXYGENASE NCED3, CHLOROPLASTIC-RELATED
Glyma.08G177100.Wm82.a4.v1	-
Glyma.08G177300.Wm82.a4.v1	(1 of 6) 4.1.99.12 - 3,4-dihydroxy-2-butanone-4-phosphate synthase / L-3,4-dihydroxybutan-2-one-4-phosphate synthase
Glyma.08G196700.Wm82.a4.v1	(1 of 2) K19327 - anoctamin-10 (ANO10)
Glyma.08G219300.Wm82.a4.v1	(1 of 2) PTHR10217:SF489 - CYCLIC NUCLEOTIDE-GATED ION CHANNEL 7-RELATED
Glyma.08G241600.Wm82.a4.v1	(1 of 2) PTHR10217//PTHR10217:SF501 - VOLTAGE AND LIGAND GATED POTASSIUM CHANNEL // CYCLIC NUCLEOTIDE-GATED ION CHANNEL 2
Glyma.08G243000.Wm82.a4.v1	(1 of 8) 1.1.1.22 - UDP-glucose 6-dehydrogenase
Glyma.08G249500.Wm82.a4.v1	(1 of 7) PTHR31625:SF2 - COUMAROYL-COA:ANTHOCYANIDIN 3-O-GLUCOSIDE-6''-O-COUMAROYLTRANSFERASE 1-RELATED
Glyma.08G249900.Wm82.a4.v1	(1 of 10) 5.4.99.30 - UDP-arabinopyranose mutase
Glyma.08G254200.Wm82.a4.v1	(1 of 6) K14207 - solute carrier family 38 (sodium-coupled neutral amino acid transporter), member 2 (SLC38A2, SNAT2)
Glyma.08G261000.Wm82.a4.v1	-
Glyma.08G281600.Wm82.a4.v1	(1 of 2) PTHR36321:SF1 - CLASSICAL ARABINOGALACTAN PROTEIN 10-RELATED
Glyma.08G284100.Wm82.a4.v1	(1 of 4) PTHR27006//PTHR27006:SF28 - FAMILY NOT NAMED // CYSTEINE-RICH RECEPTOR-LIKE PROTEIN KINASE 3
Glyma.08G285800.Wm82.a4.v1	(1 of 2) PTHR31385:SF1 - EXPRESSED PROTEIN-RELATED
Glyma.08G287500.Wm82.a4.v1	(1 of 23) PF03181 - BURP domain (BURP)
Glyma.08G288600.Wm82.a4.v1	(1 of 7) PTHR10788:SF14 - ALPHA,ALPHA-TREHALOSE-PHOSPHATE SYNTHASE [UDP-FORMING] 10-RELATED
Glyma.08G294800.Wm82.a4.v1	(1 of 4) PTHR31205:SF2 - ACTIN CROSS-LINKING PROTEIN
Glyma.08G297900.Wm82.a4.v1	(1 of 5) PTHR27001//PTHR27001:SF160 - FAMILY NOT NAMED // PROTEIN KINASE 2A, CHLOROPLASTIC-RELATED
Glyma.08G314100.Wm82.a4.v1	(1 of 49) PF12796//PF13962 - Ankyrin repeats (3 copies) (Ank_2) // Domain of unknown function (PGG)
Glyma.08G316500.Wm82.a4.v1	(1 of 2) PTHR24349:SF23 - MAP KINASE-ACTIVATED PROTEIN KINASE 5
Glyma.08G332900.Wm82.a4.v1	(1 of 7) K04079 - molecular chaperone HtpG (htpG, HSP90A)
Glyma.08G340900.Wm82.a4.v1	(1 of 2) PTHR31773//PTHR31773:SF11 - FAMILY NOT NAMED // METACASPASE-2
Glyma.08G342051.Wm82.a4.v1	-
Glyma.08G342100.Wm82.a4.v1	(1 of 21) PTHR33107:SF5 - KUNITZ FAMILY TRYPSIN AND PROTEASE INHIBITOR PROTEIN-RELATED
Glyma.08G352100.Wm82.a4.v1	(1 of 9) PTHR27002:SF84 - ATP BINDING / PROTEIN KINASE-RELATED
Glyma.08G363800.Wm82.a4.v1	(1 of 4) PTHR18860:SF27 - 14-3-3-LIKE PROTEIN GF14 LAMBDA
Glyma.08G363900.Wm82.a4.v1	(1 of 6) 1.1.1.54//1.3.1.102 - Allyl-alcohol dehydrogenase // 2-alkenal reductase (NADP(+)) / NADPH-dependent alkenal/one oxidoreductase
Glyma.09G005500.Wm82.a4.v1	(1 of 1) PTHR24361:SF396 - MITOGEN-ACTIVATED PROTEIN KINASE KINASE KINASE 15-RELATED
Glyma.09G005700.Wm82.a4.v1	(1 of 176) PF03106 - WRKY DNA -binding domain (WRKY)
Glyma.09G008200.Wm82.a4.v1	(1 of 18) PTHR12183 - UNCHARACTERIZED RING ZINC FINGER-CONTAINING PROTEIN
Glyma.09G011200.Wm82.a4.v1	(1 of 5) PTHR23130//PTHR23130:SF80 - FAMILY NOT NAMED // AUXIN-INDUCED IN ROOT CULTURES PROTEIN 12
Glyma.09G022000.Wm82.a4.v1	(1 of 20) KOG0513 - Ca2+-independent phospholipase A2
Glyma.09G027000.Wm82.a4.v1	(1 of 11) PTHR32448:SF34 - F22M8.11 PROTEIN-RELATED
Glyma.09G027900.Wm82.a4.v1	(1 of 8) PTHR27005//PTHR27005:SF7 - FAMILY NOT NAMED // WALL-ASSOCIATED RECEPTOR KINASE-LIKE 1-RELATED
Glyma.09G032100.Wm82.a4.v1	(1 of 2) PTHR10641:SF623 - MYB DOMAIN PROTEIN 78
Glyma.09G052600.Wm82.a4.v1	(1 of 4) PTHR23076//PTHR23076:SF60 - METALLOPROTEASE M41 FTSH // SUBFAMILY NOT NAMED
Glyma.09G061900.Wm82.a4.v1	(1 of 16) PF03106//PF10533 - WRKY DNA -binding domain (WRKY) // Plant zinc cluster domain (Plant_zn_clust)
Glyma.09G066400.Wm82.a4.v1	(1 of 5) PTHR31115//PTHR31115:SF3 - FAMILY NOT NAMED // EXPRESSED PROTEIN
Glyma.09G087300.Wm82.a4.v1	(1 of 3) PTHR27000//PTHR27000:SF170 - FAMILY NOT NAMED // LEUCINE-RICH REPEAT-CONTAINING PROTEIN
Glyma.09G096500.Wm82.a4.v1	(1 of 3) PTHR11662//PTHR11662:SF153 - SODIUM-DEPENDENT PHOSPHATE TRANSPORTERS // GLYCEROL-3-PHOSPHATE TRANSPORTER 5-RELATED
Glyma.09G097200.Wm82.a4.v1	-
Glyma.09G099200.Wm82.a4.v1	(1 of 2) PF00069//PF00954//PF01453//PF07714//PF08276//PF11883 - Protein kinase domain (Pkinase) // S-locus glycoprotein domain (S_locus_glycop) // D-mannose binding lectin (B_lectin) // Protein tyrosine kinase (Pkinase_Tyr) // PAN-like domain (PAN_2) // Domain of unknown function (DUF3403) (DUF3403)
Glyma.09G117600.Wm82.a4.v1	(1 of 2) PTHR11839//PTHR11839:SF8 - UDP/ADP-SUGAR PYROPHOSPHATASE // NUDIX HYDROLASE 25
Glyma.09G123800.Wm82.a4.v1	(1 of 7) K17991 - peroxygenase (PXG)
Glyma.09G138100.Wm82.a4.v1	(1 of 3) 6.2.1.8 - Oxalate--CoA ligase / Oxalyl-CoA synthetase
Glyma.09G138300.Wm82.a4.v1	(1 of 3) K13667 - protein glucosyltransferase (RUMI, KTELC1)
Glyma.09G138600.Wm82.a4.v1	(1 of 3) PTHR22814//PTHR22814:SF52 - COPPER TRANSPORT PROTEIN ATOX1-RELATED // SUBFAMILY NOT NAMED
Glyma.09G143600.Wm82.a4.v1	(1 of 6) K19044 - E3 ubiquitin-protein ligase XBAT32/33 [EC:6.3.2.19] (XBAT32_33)
Glyma.09G143800.Wm82.a4.v1	(1 of 4) PTHR22936:SF35 - MEMBRANE PROTEIN-RELATED
Glyma.09G145600.Wm82.a4.v1	(1 of 1) PTHR27004:SF3 - RECEPTOR LIKE PROTEIN 54
Glyma.09G147200.Wm82.a4.v1	(1 of 4) PTHR31839//PTHR31839:SF8 - FAMILY NOT NAMED // DEHYDRATION-RESPONSIVE ELEMENT-BINDING PROTEIN 1A-RELATED
Glyma.09G156900.Wm82.a4.v1	(1 of 3) K15777 - 4,5-DOPA dioxygenase extradiol (DOPA)
Glyma.09G161900.Wm82.a4.v1	(1 of 9) PF03097 - BRO1-like domain (BRO1)
Glyma.09G168300.Wm82.a4.v1	(1 of 10) K01177 - beta-amylase (E3.2.1.2)
Glyma.09G181600.Wm82.a4.v1	(1 of 6) PF00069//PF14380 - Protein kinase domain (Pkinase) // Wall-associated receptor kinase C-terminal (WAK_assoc)
Glyma.09G185400.Wm82.a4.v1	(1 of 2) PTHR22814//PTHR22814:SF72 - COPPER TRANSPORT PROTEIN ATOX1-RELATED // SUBFAMILY NOT NAMED
Glyma.09G185500.Wm82.a4.v1	(1 of 8) PF00257 - Dehydrin (Dehydrin)
Glyma.09G185600.Wm82.a4.v1	(1 of 10) PTHR31086:SF20 - ALUMINUM-ACTIVATED MALATE TRANSPORTER 4-RELATED
Glyma.09G187400.Wm82.a4.v1	(1 of 4) PTHR11005//PTHR11005:SF17 - LYSOSOMAL ACID LIPASE-RELATED // AB-HYDROLASE ASSOCIATED LIPASE REGION CONTAINING PROTEIN
Glyma.09G187700.Wm82.a4.v1	(1 of 5) PTHR10992//PTHR10992:SF841 - ALPHA/BETA HYDROLASE FOLD-CONTAINING PROTEIN // SUBFAMILY NOT NAMED
Glyma.09G189500.Wm82.a4.v1	(1 of 9) K12355 - coniferyl-aldehyde dehydrogenase (REF1)
Glyma.09G189700.Wm82.a4.v1	(1 of 12) PF06376 - Protein of unknown function (DUF1070) (DUF1070)
Glyma.09G192300.Wm82.a4.v1	(1 of 5) PTHR31852//PTHR31852:SF25 - FAMILY NOT NAMED // LATE EMBRYOGENESIS ABUNDANT PROTEIN, GROUP 2
Glyma.09G196300.Wm82.a4.v1	(1 of 6) PTHR23155//PTHR23155:SF501 - LEUCINE-RICH REPEAT-CONTAINING PROTEIN // SUBFAMILY NOT NAMED
Glyma.09G196400.Wm82.a4.v1	(1 of 1) 2.3.1.20//2.3.1.75 - Diacylglycerol O-acyltransferase / Diglyceride acyltransferase // Long-chain-alcohol O-fatty-acyltransferase / Wax synthase
Glyma.09G205300.Wm82.a4.v1	(1 of 3) PTHR31065:SF2 - PLATZ TRANSCRIPTION FACTOR DOMAIN-CONTAINING PROTEIN
Glyma.09G205800.Wm82.a4.v1	(1 of 2) PTHR26312:SF53 - CARBOXYLATE CLAMP-TETRATRICOPEPTIDE REPEAT PROTEIN
Glyma.09G206800.Wm82.a4.v1	(1 of 5) K08488 - syntaxin 7 (STX7)
Glyma.09G218600.Wm82.a4.v1	(1 of 6) PTHR24286//PTHR24286:SF10 - FAMILY NOT NAMED // ABSCISIC ACID 8'-HYDROXYLASE 1-RELATED
Glyma.09G225400.Wm82.a4.v1	(1 of 5) PTHR13878:SF53 - CYTOKININ DEHYDROGENASE 6
Glyma.09G228000.Wm82.a4.v1	(1 of 5) PTHR31265:SF2 - F17A17.37 PROTEIN
Glyma.09G234251.Wm82.a4.v1	(1 of 4) PTHR24351//PTHR24351:SF73 - RIBOSOMAL PROTEIN S6 KINASE // SUBFAMILY NOT NAMED
Glyma.09G238800.Wm82.a4.v1	(1 of 4) PTHR10641//PTHR10641:SF530 - MYB-LIKE DNA-BINDING PROTEIN MYB // SUBFAMILY NOT NAMED
Glyma.09G246600.Wm82.a4.v1	(1 of 27) PF07714//PF08263 - Protein tyrosine kinase (Pkinase_Tyr) // Leucine rich repeat N-terminal domain (LRRNT_2)
Glyma.09G251500.Wm82.a4.v1	(1 of 23) PF05212 - Protein of unknown function (DUF707) (DUF707)
Glyma.09G253200.Wm82.a4.v1	(1 of 10) PF00069//PF01476 - Protein kinase domain (Pkinase) // LysM domain (LysM)
Glyma.09G253500.Wm82.a4.v1	(1 of 4) PTHR14155:SF71 - RING-H2 FINGER PROTEIN ATL67-RELATED
Glyma.09G254302.Wm82.a4.v1	(1 of 106) PF03168 - Late embryogenesis abundant protein (LEA_2)
Glyma.09G254800.Wm82.a4.v1	(1 of 4) K13425 - WRKY transcription factor 22 (WRKY22)
Glyma.09G265500.Wm82.a4.v1	(1 of 4) PTHR24057//PTHR24057:SF19 - GLYCOGEN SYNTHASE KINASE-3 ALPHA // SHAGGY-RELATED PROTEIN KINASE BETA-RELATED
Glyma.09G276900.Wm82.a4.v1	(1 of 5) K03120 - transcription initiation factor TFIID TATA-box-binding protein (TBP, tbp)
Glyma.09G279000.Wm82.a4.v1	(1 of 12) PTHR31087:SF11 - PROTEIN LURP-ONE-RELATED 1-RELATED
Glyma.10G002200.Wm82.a4.v1	(1 of 34) PTHR23050 - CALCIUM BINDING PROTEIN
Glyma.10G008021.Wm82.a4.v1	-
Glyma.10G009100.Wm82.a4.v1	(1 of 8) K13436 - pto-interacting protein 1 (PTI1)
Glyma.10G009800.Wm82.a4.v1	(1 of 2) PTHR13832//PTHR13832:SF165 - PROTEIN PHOSPHATASE 2C // PROTEIN PHOSPHATASE 2C 13-RELATED
Glyma.10G010100.Wm82.a4.v1	(1 of 4) PTHR33669:SF1 - PROTEIN NIM1-INTERACTING 1
Glyma.10G011000.Wm82.a4.v1	(1 of 7) PTHR15486//PTHR15486:SF18 - ANCIENT UBIQUITOUS PROTEIN // GLYCEROL-3-PHOSPHATE ACYLTRANSFERASE 2-RELATED
Glyma.10G013300.Wm82.a4.v1	(1 of 4) PTHR22952//PTHR22952:SF167 - CAMP-RESPONSE ELEMENT BINDING PROTEIN-RELATED // SUBFAMILY NOT NAMED
Glyma.10G014400.Wm82.a4.v1	(1 of 4) PTHR21493//PTHR21493:SF117 - CGI-141-RELATED/LIPASE CONTAINING PROTEIN // ALPHA/BETA-HYDROLASES SUPERFAMILY PROTEIN
Glyma.10G019000.Wm82.a4.v1	(1 of 6) PTHR24223//PTHR24223:SF246 - FAMILY NOT NAMED // ABC TRANSPORTER C FAMILY MEMBER 14-RELATED
Glyma.10G024300.Wm82.a4.v1	(1 of 24) K10523 - speckle-type POZ protein (SPOP)
Glyma.10G029400.Wm82.a4.v1	(1 of 7) K06890 - uncharacterized protein (K06890)
Glyma.10G031800.Wm82.a4.v1	(1 of 55) K14484 - auxin-responsive protein IAA (IAA)
Glyma.10G039800.Wm82.a4.v1	-
Glyma.10G040700.Wm82.a4.v1	(1 of 4) PTHR11062//PTHR11062:SF56 - EXOSTOSIN HEPARAN SULFATE GLYCOSYLTRANSFERASE -RELATED // XYLOGLUCAN GALACTOSYLTRANSFERASE KATAMARI1
Glyma.10G044400.Wm82.a4.v1	-
Glyma.10G044700.Wm82.a4.v1	(1 of 4) PTHR10286//PTHR10286:SF13 - INORGANIC PYROPHOSPHATASE // INORGANIC PYROPHOSPHATASE-LIKE PROTEIN
Glyma.10G045300.Wm82.a4.v1	(1 of 12) PTHR26374//PTHR26374:SF198 - FAMILY NOT NAMED // ZINC FINGER PROTEIN ZAT11
Glyma.10G045400.Wm82.a4.v1	(1 of 12) PTHR26374//PTHR26374:SF198 - FAMILY NOT NAMED // ZINC FINGER PROTEIN ZAT11
Glyma.10G055300.Wm82.a4.v1	(1 of 4) PTHR22814:SF113 - HEAVY-METAL-ASSOCIATED DOMAIN-CONTAINING PROTEIN-RELATED
Glyma.10G059601.Wm82.a4.v1	(1 of 4) PTHR19139:SF52 - AQUAPORIN TIP1-1
Glyma.10G064400.Wm82.a4.v1	(1 of 2) PTHR23241:SF11 - LATE EMBRYOGENESIS ABUNDANT PROTEIN (ATECP63)-RELATED
Glyma.10G067000.Wm82.a4.v1	(1 of 4) PTHR31985:SF27 - ETHYLENE-RESPONSIVE TRANSCRIPTION FACTOR ERF016-RELATED
Glyma.10G067100.Wm82.a4.v1	-
Glyma.10G067500.Wm82.a4.v1	(1 of 2) PTHR22912:SF144 - MONODEHYDROASCORBATE REDUCTASE, CYTOPLASMIC ISOFORM 1-RELATED
Glyma.10G070900.Wm82.a4.v1	(1 of 22) PTHR10634 - AN1-TYPE ZINC FINGER PROTEIN
Glyma.10G079700.Wm82.a4.v1	(1 of 16) PTHR31415:SF4 - HARPIN-INDUCED PROTEIN-LIKE-RELATED
Glyma.10G082400.Wm82.a4.v1	(1 of 6) PTHR19957:SF69 - SYNTAXIN-121-RELATED
Glyma.10G090700.Wm82.a4.v1	(1 of 3) K13366 - polyamine oxidase (MPAO, PAO1)
Glyma.10G142100.Wm82.a4.v1	(1 of 12) PTHR21562:SF5 - PECTINACETYLESTERASE FAMILY PROTEIN
Glyma.10G142700.Wm82.a4.v1	(1 of 3) PTHR21659//PTHR21659:SF19 - HYDROPHOBIC PROTEIN RCI2 LOW TEMPERATURE AND SALT RESPONSIVE PROTEIN LTI6 -RELATED // HYDROPHOBIC PROTEIN RCI2B
Glyma.10G144000.Wm82.a4.v1	-
Glyma.10G151300.Wm82.a4.v1	(1 of 4) KOG4431 - Uncharacterized protein, induced by hypoxia
Glyma.10G161900.Wm82.a4.v1	(1 of 4) PTHR23050//PTHR23050:SF177 - CALCIUM BINDING PROTEIN // CALMODULIN-LIKE PROTEIN 9
Glyma.10G164100.Wm82.a4.v1	(1 of 4) PTHR23107:SF6 - GRF1-INTERACTING FACTOR 1
Glyma.10G169300.Wm82.a4.v1	(1 of 1) PF12937//PF14299 - F-box-like (F-box-like) // Phloem protein 2 (PP2)
Glyma.10G169600.Wm82.a4.v1	(1 of 3) PTHR32278//PTHR32278:SF6 - FAMILY NOT NAMED // F-BOX PROTEIN PP2-B1-RELATED
Glyma.10G171300.Wm82.a4.v1	(1 of 4) PTHR13683//PTHR13683:SF287 - ASPARTYL PROTEASES // ASPARTIC PROTEINASE-LIKE PROTEIN 2-RELATED
Glyma.10G178400.Wm82.a4.v1	(1 of 34) PTHR23050 - CALCIUM BINDING PROTEIN
Glyma.10G197400.Wm82.a4.v1	(1 of 6) PTHR24073//PTHR24073:SF536 - FAMILY NOT NAMED // RAS-RELATED PROTEIN RABC2A
Glyma.10G210600.Wm82.a4.v1	(1 of 20) PF02362//PF06507 - B3 DNA binding domain (B3) // Auxin response factor (Auxin_resp)
Glyma.10G211000.Wm82.a4.v1	(1 of 8) PTHR19139//PTHR19139:SF167 - AQUAPORIN TRANSPORTER // AQUAPORIN PIP2-1-RELATED
Glyma.10G211300.Wm82.a4.v1	(1 of 2) PTHR32241:SF3 - PATATIN-LIKE PROTEIN 6-RELATED
Glyma.10G219600.Wm82.a4.v1	(1 of 2) PTHR31989//PTHR31989:SF27 - FAMILY NOT NAMED // F23M19.14 PROTEIN-RELATED
Glyma.10G224500.Wm82.a4.v1	(1 of 14) PF05633 - Protein of unknown function (DUF793) (DUF793)
Glyma.10G239400.Wm82.a4.v1	(1 of 4) PTHR31839//PTHR31839:SF8 - FAMILY NOT NAMED // DEHYDRATION-RESPONSIVE ELEMENT-BINDING PROTEIN 1A-RELATED
Glyma.10G248400.Wm82.a4.v1	(1 of 2) PTHR13902//PTHR13902:SF70 - SERINE/THREONINE-PROTEIN KINASE WNK WITH NO LYSINE -RELATED // SUBFAMILY NOT NAMED
Glyma.10G248600.Wm82.a4.v1	(1 of 2) PTHR10174//PTHR10174:SF125 - RETINALDEHYDE BINDING PROTEIN-RELATED // GENOMIC DNA, CHROMOSOME 3, P1 CLONE: MCB17-RELATED
Glyma.10G250200.Wm82.a4.v1	(1 of 9) 3.1.1.1//4.2.1.105 - Carboxylesterase / Procaine esterase // 2-hydroxyisoflavanone dehydratase
Glyma.10G256400.Wm82.a4.v1	(1 of 4) PTHR31568//PTHR31568:SF3 - FAMILY NOT NAMED // CYSTM1 FAMILY PROTEIN A-RELATED
Glyma.10G257200.Wm82.a4.v1	-
Glyma.10G259400.Wm82.a4.v1	(1 of 4) PTHR13832//PTHR13832:SF362 - PROTEIN PHOSPHATASE 2C // PROTEIN PHOSPHATASE 2C 63-RELATED
Glyma.10G262600.Wm82.a4.v1	(1 of 6) PTHR22849:SF38 - E3 UBIQUITIN-PROTEIN LIGASE PUB22-RELATED
Glyma.10G264600.Wm82.a4.v1	(1 of 4) PTHR19297//PTHR19297:SF70 - GLYCOSYLTRANSFERASE 14 FAMILY MEMBER // SUBFAMILY NOT NAMED
Glyma.10G265100.Wm82.a4.v1	-
Glyma.10G265450.Wm82.a4.v1	-
Glyma.10G265500.Wm82.a4.v1	(1 of 42) PF01535//PF12854//PF13041 - PPR repeat (PPR) // PPR repeat (PPR_1) // PPR repeat family (PPR_2)
Glyma.10G265600.Wm82.a4.v1	-
Glyma.10G266300.Wm82.a4.v1	(1 of 80) PF14009 - Domain of unknown function (DUF4228) (DUF4228)
Glyma.10G269300.Wm82.a4.v1	(1 of 2) K18753 - butyrate response factor 1 (ZFP36L)
Glyma.10G271200.Wm82.a4.v1	(1 of 1) PTHR27005//PTHR27005:SF28//PTHR33138//PTHR33138:SF6 - FAMILY NOT NAMED // PROTEIN KINASE-LIKE PROTEIN // FAMILY NOT NAMED // SUBFAMILY NOT NAMED
Glyma.10G272500.Wm82.a4.v1	(1 of 13) PF07797 - Protein of unknown function (DUF1639) (DUF1639)
Glyma.10G274600.Wm82.a4.v1	(1 of 18) PTHR31194//PTHR31194:SF14 - SHN SHINE , DNA BINDING / TRANSCRIPTION FACTOR // SUBFAMILY NOT NAMED
Glyma.10G275000.Wm82.a4.v1	(1 of 2) PTHR34539//PTHR34539:SF1 - FAMILY NOT NAMED // GENOMIC DNA, CHROMOSOME 3, P1 CLONE: MPE11
Glyma.10G276800.Wm82.a4.v1	(1 of 5) KOG2504 - Monocarboxylate transporter
Glyma.10G277800.Wm82.a4.v1	(1 of 12) PTHR24078:SF279 - DUPLICATED SANT DNA-BINDING DOMAIN-CONTAINING PROTEIN
Glyma.10G284300.Wm82.a4.v1	(1 of 2) PTHR31618//PTHR31618:SF1 - FAMILY NOT NAMED // MECHANOSENSITIVE ION CHANNEL PROTEIN 6-RELATED
Glyma.11G003500.Wm82.a4.v1	(1 of 1) PTHR10314//PTHR10314:SF123 - SER/THR DEHYDRATASE, TRP SYNTHASE // TRYPTOPHAN SYNTHASE BETA CHAIN-LIKE PROTEIN
Glyma.11G004400.Wm82.a4.v1	(1 of 1) PTHR33312//PTHR33312:SF5 - FAMILY NOT NAMED // MEMBRANE-ASSOCIATED KINASE REGULATOR 1-RELATED
Glyma.11G004800.Wm82.a4.v1	(1 of 6) PTHR23500:SF70 - SUGAR TRANSPORT PROTEIN 13
Glyma.11G017100.Wm82.a4.v1	(1 of 4) PTHR10366//PTHR10366:SF308 - NAD DEPENDENT EPIMERASE/DEHYDRATASE // SUBFAMILY NOT NAMED
Glyma.11G018000.Wm82.a4.v1	(1 of 2) PTHR13832//PTHR13832:SF294 - PROTEIN PHOSPHATASE 2C // SUBFAMILY NOT NAMED
Glyma.11G018100.Wm82.a4.v1	(1 of 16) PTHR31657//PTHR31657:SF9 - FAMILY NOT NAMED // ETHYLENE-RESPONSIVE TRANSCRIPTION FACTOR CRF5-RELATED
Glyma.11G019900.Wm82.a4.v1	(1 of 2) PTHR32468:SF34 - CATION/H(+) ANTIPORTER 18
Glyma.11G026300.Wm82.a4.v1	(1 of 4) PTHR11206:SF127 - MATE EFFLUX FAMILY PROTEIN
Glyma.11G029000.Wm82.a4.v1	(1 of 4) PTHR31096:SF6 - ACR7-RELATED
Glyma.11G029700.Wm82.a4.v1	(1 of 7) PTHR33593:SF2 - F5O11.5
Glyma.11G034400.Wm82.a4.v1	(1 of 15) PF05703//PF08458 - Auxin canalisation (Auxin_canalis) // Plant pleckstrin homology-like region (PH_2)
Glyma.11G038700.Wm82.a4.v1	(1 of 123) 5.2.1.8 - Peptidylprolyl isomerase / Rotamase
Glyma.11G041600.Wm82.a4.v1	(1 of 5) PTHR11200:SF107 - TYPE I INOSITOL 1,4,5-TRISPHOSPHATE 5-PHOSPHATASE 2
Glyma.11G043000.Wm82.a4.v1	-
Glyma.11G046200.Wm82.a4.v1	(1 of 4) PTHR31096//PTHR31096:SF7 - FAMILY NOT NAMED // ACR1
Glyma.11G048300.Wm82.a4.v1	(1 of 28) K01537 - Ca2+-transporting ATPase (E3.6.3.8)
Glyma.11G050900.Wm82.a4.v1	(1 of 4) PTHR13832//PTHR13832:SF362 - PROTEIN PHOSPHATASE 2C // PROTEIN PHOSPHATASE 2C 63-RELATED
Glyma.11G051600.Wm82.a4.v1	(1 of 19) K14487 - auxin responsive GH3 gene family (GH3)
Glyma.11G052100.Wm82.a4.v1	(1 of 4) PTHR10641//PTHR10641:SF551 - MYB-LIKE DNA-BINDING PROTEIN MYB // MYB TRANSCRIPTION FACTOR
Glyma.11G052600.Wm82.a4.v1	(1 of 6) PTHR24006//PTHR24006:SF481 - FAMILY NOT NAMED // F-BOX PROTEIN SKIP2
Glyma.11G053100.Wm82.a4.v1	(1 of 4) PTHR31282//PTHR31282:SF33 - FAMILY NOT NAMED // WRKY TRANSCRIPTION FACTOR 15-RELATED
Glyma.11G053400.Wm82.a4.v1	(1 of 1) K18822 - soyasapogenol B glucuronide galactosyltransferase (UGT73P2)
Glyma.11G056200.Wm82.a4.v1	(1 of 4) PTHR10015//PTHR10015:SF166 - HEAT SHOCK TRANSCRIPTION FACTOR // HEAT STRESS TRANSCRIPTION FACTOR B-1
Glyma.11G069702.Wm82.a4.v1	-
Glyma.11G074300.Wm82.a4.v1	(1 of 6) PF05277 - Protein of unknown function (DUF726) (DUF726)
Glyma.11G077700.Wm82.a4.v1	(1 of 56) PF00314 - Thaumatin family (Thaumatin)
Glyma.11G080400.Wm82.a4.v1	(1 of 6) PTHR13683//PTHR13683:SF232 - ASPARTYL PROTEASES // ASPARTYL PROTEASE FAMILY PROTEIN
Glyma.11G081000.Wm82.a4.v1	-
Glyma.11G085400.Wm82.a4.v1	(1 of 8) PTHR27001:SF32 - INTERLEUKIN-1 RECEPTOR-ASSOCIATED KINASE 4 PROTEIN-RELATED
Glyma.11G088200.Wm82.a4.v1	(1 of 5) K00384 - thioredoxin reductase (NADPH) (trxB)
Glyma.11G090800.Wm82.a4.v1	-
Glyma.11G096000.Wm82.a4.v1	(1 of 111) PF03514 - GRAS domain family (GRAS)
Glyma.11G096700.Wm82.a4.v1	(1 of 2) PTHR31692:SF4 - EXPANSIN-LIKE A1-RELATED
Glyma.11G097500.Wm82.a4.v1	(1 of 4) PTHR34574//PTHR34574:SF2 - FAMILY NOT NAMED // EF-HAND CONTAINING PROTEIN-LIKE
Glyma.11G105000.Wm82.a4.v1	(1 of 2) PTHR27008:SF40 - LEUCINE-RICH REPEAT PROTEIN KINASE-LIKE PROTEIN
Glyma.11G106300.Wm82.a4.v1	(1 of 5) PTHR21576:SF17 - MAJOR FACILITATOR FAMILY PROTEIN
Glyma.11G106900.Wm82.a4.v1	(1 of 10) PF06911 - Senescence-associated protein (Senescence)
Glyma.11G107300.Wm82.a4.v1	(1 of 5) PTHR10774:SF50 - SYNAPTOTAGMIN-1-RELATED
Glyma.11G112800.Wm82.a4.v1	(1 of 44) PF00643 - B-box zinc finger (zf-B_box)
Glyma.11G122400.Wm82.a4.v1	(1 of 2) PTHR14155:SF185 - RING-H2 FINGER PROTEIN ATL65
Glyma.11G122700.Wm82.a4.v1	(1 of 4) K01723 - hydroperoxide dehydratase (AOS)
Glyma.11G123000.Wm82.a4.v1	(1 of 3) PTHR22844//PTHR22844:SF145 - F-BOX AND WD40 DOMAIN PROTEIN // SUBFAMILY NOT NAMED
Glyma.11G125400.Wm82.a4.v1	(1 of 3) K13344 - peroxin-13 (PEX13)
Glyma.11G139500.Wm82.a4.v1	(1 of 4) PTHR13832//PTHR13832:SF228 - PROTEIN PHOSPHATASE 2C // PROTEIN PHOSPHATASE 2C 36-RELATED
Glyma.11G143100.Wm82.a4.v1	(1 of 3) PTHR19139//PTHR19139:SF55 - AQUAPORIN TRANSPORTER // SUBFAMILY NOT NAMED
Glyma.11G144600.Wm82.a4.v1	(1 of 5) PTHR12542//PTHR12542:SF17 - EXOCYST COMPLEX PROTEIN EXO70 // SUBFAMILY NOT NAMED
Glyma.11G150452.Wm82.a4.v1	(1 of 2) PTHR24055:SF214 - MITOGEN-ACTIVATED PROTEIN KINASE 3
Glyma.11G158394.Wm82.a4.v1	(1 of 3) PTHR31174//PTHR31174:SF2 - SEED MATURATION FAMILY PROTEIN // EMBRYONIC ABUNDANT PROTEIN-RELATED
Glyma.11G159021.Wm82.a4.v1	-
Glyma.11G170300.Wm82.a4.v1	(1 of 7) K01953 - asparagine synthase (glutamine-hydrolysing) (asnB, ASNS)
Glyma.11G178300.Wm82.a4.v1	(1 of 3) PTHR27003//PTHR27003:SF63 - FAMILY NOT NAMED // CALMODULIN-BINDING RECEPTOR-LIKE CYTOPLASMIC KINASE 1
Glyma.11G185700.Wm82.a4.v1	(1 of 2) PTHR24296//PTHR24296:SF7 - FAMILY NOT NAMED // CYTOCHROME P450 94C1
Glyma.11G194500.Wm82.a4.v1	(1 of 1) PTHR24096//PTHR24096:SF213//PTHR24096:SF236 - FAMILY NOT NAMED // SUBFAMILY NOT NAMED // PROTEIN ACS-9
Glyma.11G194600.Wm82.a4.v1	(1 of 4) PTHR22814:SF100 - HEAVY METAL TRANSPORT/DETOXIFICATION DOMAIN-CONTAINING PROTEIN-RELATED
Glyma.11G194800.Wm82.a4.v1	(1 of 6) PTHR31374//PTHR31374:SF16 - FAMILY NOT NAMED // AUXIN-RESPONSIVE FAMILY PROTEIN
Glyma.11G198300.Wm82.a4.v1	(1 of 3) 6.2.1.8 - Oxalate--CoA ligase / Oxalyl-CoA synthetase
Glyma.11G215800.Wm82.a4.v1	(1 of 3) PTHR10641:SF498 - MYB TRANSCRIPTION FACTOR
Glyma.11G217200.Wm82.a4.v1	(1 of 10) PTHR10891:SF573 - CALCIUM-BINDING PROTEIN CML24-RELATED
Glyma.11G220300.Wm82.a4.v1	(1 of 3) PTHR13683//PTHR13683:SF347 - ASPARTYL PROTEASES // CYSTEINE-RICH PEPTIDE FAMILY PROTEIN
Glyma.11G222600.Wm82.a4.v1	(1 of 4) PTHR13832//PTHR13832:SF219 - PROTEIN PHOSPHATASE 2C // PROTEIN PHOSPHATASE 2C 3-RELATED
Glyma.11G226000.Wm82.a4.v1	(1 of 4) PTHR22950//PTHR22950:SF48 - AMINO ACID TRANSPORTER // PROLINE TRANSPORTER 1-RELATED
Glyma.11G228100.Wm82.a4.v1	(1 of 4) PF07014//PF07231 - Hs1pro-1 protein C-terminus (Hs1pro-1_C) // Hs1pro-1 N-terminus (Hs1pro-1_N)
Glyma.11G229100.Wm82.a4.v1	(1 of 1) PF10457 - Cholesterol-capturing domain (MENTAL)
Glyma.11G230100.Wm82.a4.v1	(1 of 12) K05857 - phosphatidylinositol phospholipase C, delta (PLCD)
Glyma.11G230600.Wm82.a4.v1	(1 of 11) PTHR27003//PTHR27003:SF102 - FAMILY NOT NAMED // SERINE/THREONINE-PROTEIN KINASE-LIKE PROTEIN CCR3-RELATED
Glyma.11G234300.Wm82.a4.v1	(1 of 10) PF07107 - Wound-induced protein WI12 (WI12)
Glyma.11G235300.Wm82.a4.v1	(1 of 7) PTHR24347//PTHR24347:SF167 - SERINE/THREONINE-PROTEIN KINASE // CBL-INTERACTING SERINE/THREONINE-PROTEIN KINASE 2
Glyma.11G236500.Wm82.a4.v1	-
Glyma.11G241500.Wm82.a4.v1	(1 of 2) PTHR12736//PTHR12736:SF14 - LANC-LIKE PROTEIN // LANC-LIKE PROTEIN GCL1
Glyma.11G242100.Wm82.a4.v1	-
Glyma.11G243900.Wm82.a4.v1	(1 of 2) PTHR10159//PTHR10159:SF359 - DUAL SPECIFICITY PROTEIN PHOSPHATASE // SUBFAMILY NOT NAMED
Glyma.11G250700.Wm82.a4.v1	(1 of 2) PTHR34687:SF1 - CHAPERONE PROTEIN DNAJ-LIKE PROTEIN
Glyma.12G008550.Wm82.a4.v1	(1 of 5) PTHR31265:SF2 - F17A17.37 PROTEIN
Glyma.12G011400.Wm82.a4.v1	(1 of 5) PTHR13878:SF53 - CYTOKININ DEHYDROGENASE 6
Glyma.12G015300.Wm82.a4.v1	(1 of 1) PTHR11695//PTHR11695:SF538 - ALCOHOL DEHYDROGENASE RELATED // SUBFAMILY NOT NAMED
Glyma.12G015800.Wm82.a4.v1	(1 of 1) KOG0250//KOG0978//KOG0992//KOG1003//KOG4593//KOG4787 - DNA repair protein RAD18 (SMC family protein) // E3 ubiquitin ligase involved in syntaxin degradation // Uncharacterized conserved protein // Actin filament-coating protein tropomyosin // Mitotic checkpoint protein MAD1 // Uncharacterized conserved protein
Glyma.12G022800.Wm82.a4.v1	(1 of 2) PTHR31692:SF4 - EXPANSIN-LIKE A1-RELATED
Glyma.12G031300.Wm82.a4.v1	(1 of 5) PTHR21576:SF17 - MAJOR FACILITATOR FAMILY PROTEIN
Glyma.12G039000.Wm82.a4.v1	-
Glyma.12G047300.Wm82.a4.v1	(1 of 2) PTHR14155:SF185 - RING-H2 FINGER PROTEIN ATL65
Glyma.12G047400.Wm82.a4.v1	(1 of 6) PTHR24096:SF134 - LONG CHAIN ACYL-COA SYNTHETASE 2
Glyma.12G047500.Wm82.a4.v1	(1 of 6) PF05562 - Cold acclimation protein WCOR413 (WCOR413)
Glyma.12G049300.Wm82.a4.v1	-
Glyma.12G059000.Wm82.a4.v1	(1 of 1) KOG1483 - Zn2+ transporter ZNT1 and related Cd2+/Zn2+ transporters (cation diffusion facilitator superfamily)
Glyma.12G065900.Wm82.a4.v1	(1 of 12) PF06136 - Domain of unknown function (DUF966) (DUF966)
Glyma.12G073000.Wm82.a4.v1	(1 of 2) PTHR24055:SF214 - MITOGEN-ACTIVATED PROTEIN KINASE 3
Glyma.12G076700.Wm82.a4.v1	(1 of 4) PTHR31223:SF23 - CYTOKININ RIBOSIDE 5'-MONOPHOSPHATE PHOSPHORIBOHYDROLASE LOG1
Glyma.12G082600.Wm82.a4.v1	-
Glyma.12G084500.Wm82.a4.v1	(1 of 8) PTHR22950//PTHR22950:SF319 - AMINO ACID TRANSPORTER // GABA TRANSPORTER 1
Glyma.12G084900.Wm82.a4.v1	(1 of 4) PTHR33270:SF3 - EXPRESSED PROTEIN
Glyma.12G088300.Wm82.a4.v1	(1 of 2) PTHR10459//PTHR10459:SF54 - DNA LIGASE // POLY [ADP-RIBOSE] POLYMERASE 3
Glyma.12G110100.Wm82.a4.v1	-
Glyma.12G113200.Wm82.a4.v1	(1 of 4) PTHR31805//PTHR31805:SF3 - FAMILY NOT NAMED // PROLINE-RICH PROTEIN-RELATED
Glyma.12G113400.Wm82.a4.v1	(1 of 4) PTHR31451//PTHR31451:SF1 - FAMILY NOT NAMED // MANNAN ENDO-1,4-BETA-MANNOSIDASE 2-RELATED
Glyma.12G114100.Wm82.a4.v1	(1 of 7) PTHR27007//PTHR27007:SF9 - FAMILY NOT NAMED // L-TYPE LECTIN-DOMAIN CONTAINING RECEPTOR KINASE VII.1-RELATED
Glyma.12G116800.Wm82.a4.v1	(1 of 1) PTHR13832//PTHR13832:SF372 - PROTEIN PHOSPHATASE 2C // PROTEIN PHOSPHATASE 2C 20-RELATED
Glyma.12G117000.Wm82.a4.v1	(1 of 349) PF00847 - AP2 domain (AP2)
Glyma.12G137700.Wm82.a4.v1	(1 of 111) PF03514 - GRAS domain family (GRAS)
Glyma.12G156900.Wm82.a4.v1	(1 of 16) PF04859 - Plant protein of unknown function (DUF641) (DUF641)
Glyma.12G163008.Wm82.a4.v1	(1 of 4) PTHR13832:SF333 - PROTEIN PHOSPHATASE 2C 39-RELATED
Glyma.12G163800.Wm82.a4.v1	(1 of 3) PTHR11654:SF177 - PROTEIN NRT1/ PTR FAMILY 4.3
Glyma.12G167400.Wm82.a4.v1	(1 of 2) PTHR10374//PTHR10374:SF13 - LACTOYLGLUTATHIONE LYASE GLYOXALASE I // SUBFAMILY NOT NAMED
Glyma.12G172250.Wm82.a4.v1	(1 of 7) PTHR24078//PTHR24078:SF207 - DNAJ HOMOLOG SUBFAMILY C MEMBER // PROTEIN DNJ-19
Glyma.12G173500.Wm82.a4.v1	(1 of 72) PF01344 - Kelch motif (Kelch_1)
Glyma.12G176500.Wm82.a4.v1	(1 of 2) PTHR27001:SF194 - PROTEIN KINASE FAMILY PROTEIN
Glyma.12G179800.Wm82.a4.v1	(1 of 6) PTHR13683:SF348 - ASPARTYL PROTEASE FAMILY PROTEIN
Glyma.12G183800.Wm82.a4.v1	(1 of 22) PTHR10634 - AN1-TYPE ZINC FINGER PROTEIN
Glyma.12G185400.Wm82.a4.v1	(1 of 2) PTHR10183//PTHR10183:SF299 - CALPAIN // SUBFAMILY NOT NAMED
Glyma.12G192600.Wm82.a4.v1	(1 of 8) K14009 - B-cell receptor-associated protein 31 (BCAP31, BAP31)
Glyma.12G199600.Wm82.a4.v1	(1 of 5) PTHR10641//PTHR10641:SF567 - MYB-LIKE DNA-BINDING PROTEIN MYB // SUBFAMILY NOT NAMED
Glyma.12G200800.Wm82.a4.v1	(1 of 36) PF12609 - Wound-induced protein (DUF3774)
Glyma.12G205700.Wm82.a4.v1	(1 of 4) PTHR14493//PTHR14493:SF53 - UNCHARACTERIZED // ZINC FINGER CCCH DOMAIN-CONTAINING PROTEIN 2-RELATED
Glyma.12G206700.Wm82.a4.v1	-
Glyma.12G207400.Wm82.a4.v1	(1 of 4) PTHR10168//PTHR10168:SF111 - GLUTAREDOXIN // MONOTHIOL GLUTAREDOXIN-S13
Glyma.12G216100.Wm82.a4.v1	(1 of 111) PF03514 - GRAS domain family (GRAS)
Glyma.12G221500.Wm82.a4.v1	(1 of 4) PTHR31719:SF34 - NAC DOMAIN-CONTAINING PROTEIN 19-RELATED
Glyma.12G222500.Wm82.a4.v1	(1 of 2) PTHR13780:SF39 - CBS DOMAIN-CONTAINING PROTEIN-RELATED
Glyma.12G225500.Wm82.a4.v1	(1 of 7) PTHR33021:SF45 - EARLY NODULIN-LIKE PROTEIN 3-RELATED
Glyma.12G226600.Wm82.a4.v1	(1 of 349) PF00847 - AP2 domain (AP2)
Glyma.12G234500.Wm82.a4.v1	(1 of 4) PTHR10791//PTHR10791:SF57 - RAG1-ACTIVATING PROTEIN 1 // SUBFAMILY NOT NAMED
Glyma.13G012200.Wm82.a4.v1	-
Glyma.13G031600.Wm82.a4.v1	(1 of 6) PTHR22950//PTHR22950:SF205 - AMINO ACID TRANSPORTER // AMINO ACID PERMEASE 3-RELATED
Glyma.13G032100.Wm82.a4.v1	(1 of 2227) 2.7.11.1 - Non-specific serine/threonine protein kinase / Threonine-specific protein kinase
Glyma.13G035100.Wm82.a4.v1	(1 of 3) PTHR10891//PTHR10891:SF530 - EF-HAND CALCIUM-BINDING DOMAIN CONTAINING PROTEIN // SUBFAMILY NOT NAMED
Glyma.13G042300.Wm82.a4.v1	(1 of 4) PTHR14155//PTHR14155:SF101 - RING FINGER DOMAIN-CONTAINING // SUBFAMILY NOT NAMED
Glyma.13G043900.Wm82.a4.v1	(1 of 4) PTHR31279//PTHR31279:SF12 - FAMILY NOT NAMED // PHI-1-LIKE PROTEIN
Glyma.13G047300.Wm82.a4.v1	(1 of 6) 5.3.99.6 - Allene-oxide cyclase
Glyma.13G063200.Wm82.a4.v1	(1 of 4) PTHR10641//PTHR10641:SF530 - MYB-LIKE DNA-BINDING PROTEIN MYB // SUBFAMILY NOT NAMED
Glyma.13G067900.Wm82.a4.v1	(1 of 2) PTHR13778//PTHR13778:SF7 - GLYCOSYLTRANSFERASE 8 DOMAIN-CONTAINING PROTEIN // GALACTURONOSYLTRANSFERASE-LIKE 8-RELATED
Glyma.13G068800.Wm82.a4.v1	(1 of 150) KOG0156 - Cytochrome P450 CYP2 subfamily
Glyma.13G069200.Wm82.a4.v1	(1 of 2) PTHR14677//PTHR14677:SF2 - ARSENITE INDUCUBLE RNA ASSOCIATED PROTEIN AIP-1-RELATED // AN1-TYPE ZINC FINGER PROTEIN 1
Glyma.13G069800.Wm82.a4.v1	(1 of 5) PTHR21493:SF148 - SENESCENCE-ASSOCIATED CARBOXYLESTERASE 101
Glyma.13G072800.Wm82.a4.v1	(1 of 4) PTHR22763//PTHR22763:SF24 - RING ZINC FINGER PROTEIN // SUBFAMILY NOT NAMED
Glyma.13G082100.Wm82.a4.v1	(1 of 2) K18758 - DIS3-like exonuclease 2 [EC:3.1.13.-] (DIS3L2)
Glyma.13G088100.Wm82.a4.v1	(1 of 16) PTHR31657//PTHR31657:SF9 - FAMILY NOT NAMED // ETHYLENE-RESPONSIVE TRANSCRIPTION FACTOR CRF5-RELATED
Glyma.13G088700.Wm82.a4.v1	(1 of 3) PTHR10502:SF98 - ANNEXIN D1-RELATED
Glyma.13G089700.Wm82.a4.v1	(1 of 4) PTHR10108//PTHR10108:SF899 - METHYLTRANSFERASE // PECTIN METHYLTRANSFERASE QUA2-RELATED
Glyma.13G092600.Wm82.a4.v1	-
Glyma.13G094900.Wm82.a4.v1	(1 of 9) PTHR31062//PTHR31062:SF32 - FAMILY NOT NAMED // XYLOGLUCAN ENDOTRANSGLUCOSYLASE/HYDROLASE PROTEIN 25-RELATED
Glyma.13G097900.Wm82.a4.v1	(1 of 22) K01535 - H+-transporting ATPase (E3.6.3.6)
Glyma.13G102000.Wm82.a4.v1	(1 of 16) PF03106//PF10533 - WRKY DNA -binding domain (WRKY) // Plant zinc cluster domain (Plant_zn_clust)
Glyma.13G105800.Wm82.a4.v1	-
Glyma.13G109700.Wm82.a4.v1	(1 of 4) PTHR22893//PTHR22893:SF67 - NADH OXIDOREDUCTASE-RELATED // 12-OXOPHYTODIENOATE REDUCTASE 3
Glyma.13G109800.Wm82.a4.v1	(1 of 4) PTHR22893//PTHR22893:SF67 - NADH OXIDOREDUCTASE-RELATED // 12-OXOPHYTODIENOATE REDUCTASE 3
Glyma.13G111500.Wm82.a4.v1	(1 of 5) PTHR10338//PTHR10338:SF114 - VON WILLEBRAND FACTOR, TYPE A DOMAIN CONTAINING // SUBFAMILY NOT NAMED
Glyma.13G112400.Wm82.a4.v1	(1 of 8) PTHR31985:SF34 - ETHYLENE-RESPONSIVE TRANSCRIPTION FACTOR ERF018
Glyma.13G127500.Wm82.a4.v1	(1 of 3) PTHR24223:SF189 - ABC TRANSPORTER C FAMILY MEMBER 5
Glyma.13G132400.Wm82.a4.v1	(1 of 4) PTHR10286//PTHR10286:SF13 - INORGANIC PYROPHOSPHATASE // INORGANIC PYROPHOSPHATASE-LIKE PROTEIN
Glyma.13G133100.Wm82.a4.v1	(1 of 12) PTHR26374//PTHR26374:SF198 - FAMILY NOT NAMED // ZINC FINGER PROTEIN ZAT11
Glyma.13G138600.Wm82.a4.v1	(1 of 6) K04551//K08770 - ubiquitin B (UBB) // ubiquitin C (UBC)
Glyma.13G149100.Wm82.a4.v1	(1 of 3) PTHR14255//PTHR14255:SF5 - ATP-DEPENDENT PROTEASE CEREBLON // SUBFAMILY NOT NAMED
Glyma.13G152100.Wm82.a4.v1	-
Glyma.13G152916.Wm82.a4.v1	(1 of 22) PTHR10634 - AN1-TYPE ZINC FINGER PROTEIN
Glyma.13G154300.Wm82.a4.v1	(1 of 26) 2.7.11.17 - Calcium/calmodulin-dependent protein kinase / Microtubule-associated protein 2 kinase
Glyma.13G156700.Wm82.a4.v1	-
Glyma.13G157400.Wm82.a4.v1	-
Glyma.13G158200.Wm82.a4.v1	(1 of 5) PTHR33021//PTHR33021:SF55 - FAMILY NOT NAMED // BLUE COPPER PROTEIN
Glyma.13G162900.Wm82.a4.v1	(1 of 2) PTHR11662//PTHR11662:SF243 - SODIUM-DEPENDENT PHOSPHATE TRANSPORTERS // ANION TRANSPORTER 6, CHLOROPLASTIC-RELATED
Glyma.13G176100.Wm82.a4.v1	(1 of 3) PTHR10666//PTHR10666:SF150 - UBIQUITIN // POLYUBIQUITIN 3
Glyma.13G181900.Wm82.a4.v1	(1 of 150) KOG0156 - Cytochrome P450 CYP2 subfamily
Glyma.13G183900.Wm82.a4.v1	(1 of 4) PTHR10799:SF705 - SNF2 , HELICASE AND ZINC-FINGER DOMAIN-CONTAINING PROTEIN-RELATED
Glyma.13G206700.Wm82.a4.v1	(1 of 4) PTHR11132:SF112 - GLUCOSE-6-PHOSPHATE/PHOSPHATE TRANSLOCATOR 1, CHLOROPLASTIC-RELATED
Glyma.13G210000.Wm82.a4.v1	(1 of 1) 3.1.1.45 - Carboxymethylenebutenolidase / Maleylacetate enol-lactonase
Glyma.13G215000.Wm82.a4.v1	(1 of 2) PTHR31352//PTHR31352:SF3 - FAMILY NOT NAMED // INACTIVE BETA-AMYLASE 9
Glyma.13G219100.Wm82.a4.v1	(1 of 7) PTHR33077:SF17 - PROTEIN TIFY 5A-RELATED
Glyma.13G220900.Wm82.a4.v1	(1 of 2) PTHR13018:SF22 - EARLY-RESPONSIVE TO DEHYDRATION STRESS PROTEIN (ERD4)
Glyma.13G221700.Wm82.a4.v1	-
Glyma.13G222100.Wm82.a4.v1	(1 of 3) PTHR10209//PTHR10209:SF176 - OXIDOREDUCTASE, 2OG-FE II OXYGENASE FAMILY PROTEIN // SUBFAMILY NOT NAMED
Glyma.13G222400.Wm82.a4.v1	(1 of 6) K03259 - translation initiation factor 4E (EIF4E)
Glyma.13G222600.Wm82.a4.v1	(1 of 28) PF04520 - Senescence regulator (Senescence_reg)
Glyma.13G223900.Wm82.a4.v1	(1 of 2) PTHR33199:SF3 - MACPF DOMAIN-CONTAINING PROTEIN CAD1
Glyma.13G225700.Wm82.a4.v1	(1 of 4) PTHR10015:SF161 - E2F/DP FAMILY WINGED-HELIX DNA-BINDING DOMAIN-CONTAINING PROTEIN-RELATED
Glyma.13G226600.Wm82.a4.v1	-
Glyma.13G234500.Wm82.a4.v1	(1 of 3) PTHR10168:SF69 - GLUTAREDOXIN-C9
Glyma.13G236500.Wm82.a4.v1	(1 of 349) PF00847 - AP2 domain (AP2)
Glyma.13G236600.Wm82.a4.v1	(1 of 349) PF00847 - AP2 domain (AP2)
Glyma.13G237700.Wm82.a4.v1	(1 of 2) PTHR23241:SF65 - LATE EMBRYOGENESIS ABUNDANT PROTEIN (LEA) FAMILY PROTEIN-RELATED
Glyma.13G240100.Wm82.a4.v1	(1 of 8) PF05755 - Rubber elongation factor protein (REF) (REF)
Glyma.13G240900.Wm82.a4.v1	(1 of 2) PTHR13780//PTHR13780:SF55 - AMP-ACTIVATED PROTEIN KINASE, GAMMA REGULATORY SUBUNIT // SUBFAMILY NOT NAMED
Glyma.13G242100.Wm82.a4.v1	(1 of 12) PTHR11772//PTHR11772:SF14 - ASPARAGINE SYNTHETASE // SUBFAMILY NOT NAMED
Glyma.13G245500.Wm82.a4.v1	(1 of 3) PTHR23423//PTHR23423:SF15 - ORGANIC SOLUTE TRANSPORTER-RELATED // SUBFAMILY NOT NAMED
Glyma.13G245600.Wm82.a4.v1	(1 of 3) PTHR33098:SF10 - T28P6.11 PROTEIN
Glyma.13G250900.Wm82.a4.v1	(1 of 2) K02553 - regulator of ribonuclease activity A (rraA, menG)
Glyma.13G253300.Wm82.a4.v1	(1 of 2) PF00069//PF00560//PF07714//PF08263 - Protein kinase domain (Pkinase) // Leucine Rich Repeat (LRR_1) // Protein tyrosine kinase (Pkinase_Tyr) // Leucine rich repeat N-terminal domain (LRRNT_2)
Glyma.13G259400.Wm82.a4.v1	(1 of 5) PTHR10209:SF91 - GIBBERELLIN 2-BETA-DIOXYGENASE 1
Glyma.13G261200.Wm82.a4.v1	(1 of 2) PTHR10774:SF80 - CALCIUM-DEPENDENT LIPID-BINDING DOMAIN-CONTAINING PROTEIN
Glyma.13G266600.Wm82.a4.v1	(1 of 3) PTHR31506//PTHR31506:SF2 - FAMILY NOT NAMED // BES1/BZR1 HOMOLOG PROTEIN 4
Glyma.13G274100.Wm82.a4.v1	(1 of 349) PF00847 - AP2 domain (AP2)
Glyma.13G275800.Wm82.a4.v1	(1 of 7) PTHR33021:SF45 - EARLY NODULIN-LIKE PROTEIN 3-RELATED
Glyma.13G275850.Wm82.a4.v1	-
Glyma.13G279100.Wm82.a4.v1	(1 of 2) PTHR13780:SF39 - CBS DOMAIN-CONTAINING PROTEIN-RELATED
Glyma.13G279900.Wm82.a4.v1	(1 of 4) PTHR31719:SF34 - NAC DOMAIN-CONTAINING PROTEIN 19-RELATED
Glyma.13G281600.Wm82.a4.v1	(1 of 3) PTHR33098:SF10 - T28P6.11 PROTEIN
Glyma.13G285300.Wm82.a4.v1	(1 of 150) KOG0156 - Cytochrome P450 CYP2 subfamily
Glyma.13G285400.Wm82.a4.v1	(1 of 111) PF03514 - GRAS domain family (GRAS)
Glyma.13G293200.Wm82.a4.v1	(1 of 4) PTHR24073//PTHR24073:SF553 - FAMILY NOT NAMED // RAS-RELATED PROTEIN RABA1G
Glyma.13G298600.Wm82.a4.v1	(1 of 16) PTHR31657//PTHR31657:SF9 - FAMILY NOT NAMED // ETHYLENE-RESPONSIVE TRANSCRIPTION FACTOR CRF5-RELATED
Glyma.13G299600.Wm82.a4.v1	(1 of 4) PTHR11266:SF16 - PEROXISOMAL MEMBRANE (MPV17/PMP22) FAMILY PROTEIN
Glyma.13G302800.Wm82.a4.v1	(1 of 3) PTHR10332:SF30 - EQUILIBRATIVE NUCLEOTIDE TRANSPORTER 2
Glyma.13G304900.Wm82.a4.v1	(1 of 111) PF03514 - GRAS domain family (GRAS)
Glyma.13G309800.Wm82.a4.v1	(1 of 8) K14009 - B-cell receptor-associated protein 31 (BCAP31, BAP31)
Glyma.13G316200.Wm82.a4.v1	(1 of 4) PTHR32227:SF70 - GLUCAN ENDO-1,3-BETA-GLUCOSIDASE 14
Glyma.13G324000.Wm82.a4.v1	(1 of 2) PTHR27001:SF194 - PROTEIN KINASE FAMILY PROTEIN
Glyma.13G325800.Wm82.a4.v1	(1 of 4) PTHR33083//PTHR33083:SF9 - FAMILY NOT NAMED // EMB|CAB72159.1
Glyma.13G325900.Wm82.a4.v1	(1 of 4) PTHR19139//PTHR19139:SF158 - AQUAPORIN TRANSPORTER // AQUAPORIN PIP2-4-RELATED
Glyma.13G326800.Wm82.a4.v1	(1 of 72) PF01344 - Kelch motif (Kelch_1)
Glyma.13G333100.Wm82.a4.v1	(1 of 3) PTHR19139//PTHR19139:SF55 - AQUAPORIN TRANSPORTER // SUBFAMILY NOT NAMED
Glyma.13G337200.Wm82.a4.v1	(1 of 5) PTHR31636:SF54 - SCARECROW-LIKE PROTEIN 14-RELATED
Glyma.13G344200.Wm82.a4.v1	(1 of 1) PTHR10891//PTHR10891:SF578 - EF-HAND CALCIUM-BINDING DOMAIN CONTAINING PROTEIN // CALMODULIN-LIKE PROTEIN 4-RELATED
Glyma.13G352000.Wm82.a4.v1	(1 of 79) PF02701 - Dof domain, zinc finger (zf-Dof)
Glyma.13G352200.Wm82.a4.v1	(1 of 2) K12197 - charged multivesicular body protein 1 (CHMP1, VPS46, DID2)
Glyma.13G357100.Wm82.a4.v1	(1 of 4) PTHR24326//PTHR24326:SF272 - FAMILY NOT NAMED // HOMEOBOX-LEUCINE ZIPPER PROTEIN GLABRA 2
Glyma.13G357800.Wm82.a4.v1	(1 of 8) PTHR14255//PTHR14255:SF6 - ATP-DEPENDENT PROTEASE CEREBLON // SUBFAMILY NOT NAMED
Glyma.14G006600.Wm82.a4.v1	(1 of 2) PTHR13902//PTHR13902:SF60 - SERINE/THREONINE-PROTEIN KINASE WNK WITH NO LYSINE -RELATED // SUBFAMILY NOT NAMED
Glyma.14G016100.Wm82.a4.v1	-
Glyma.14G020000.Wm82.a4.v1	(1 of 3) PTHR32227//PTHR32227:SF116 - FAMILY NOT NAMED // O-GLYCOSYL HYDROLASES FAMILY 17 PROTEIN
Glyma.14G021900.Wm82.a4.v1	(1 of 12) PF04885 - Stigma-specific protein, Stig1 (Stig1)
Glyma.14G030400.Wm82.a4.v1	(1 of 1) K00457 - 4-hydroxyphenylpyruvate dioxygenase (HPD, hppD)
Glyma.14G037200.Wm82.a4.v1	(1 of 6) PF16712 - Coiled-coil regions of plant-specific actin-binding protein (SCAB_CC)
Glyma.14G037300.Wm82.a4.v1	(1 of 106) PF03168 - Late embryogenesis abundant protein (LEA_2)
Glyma.14G037800.Wm82.a4.v1	(1 of 9) PTHR32468:SF17 - CATION/H(+) ANTIPORTER 10-RELATED
Glyma.14G042600.Wm82.a4.v1	(1 of 4) PTHR11695//PTHR11695:SF490 - ALCOHOL DEHYDROGENASE RELATED // SUBFAMILY NOT NAMED
Glyma.14G044400.Wm82.a4.v1	(1 of 120) PF00560//PF08263//PF13855 - Leucine Rich Repeat (LRR_1) // Leucine rich repeat N-terminal domain (LRRNT_2) // Leucine rich repeat (LRR_8)
Glyma.14G046100.Wm82.a4.v1	(1 of 2) PTHR12555//PTHR12555:SF14 - UBIQUITIN FUSION DEGRADATON PROTEIN 1 // SUBFAMILY NOT NAMED
Glyma.14G056300.Wm82.a4.v1	(1 of 1) PF00141//PF10604 - Peroxidase (peroxidase) // Polyketide cyclase / dehydrase and lipid transport (Polyketide_cyc2)
Glyma.14G058700.Wm82.a4.v1	(1 of 11) 1.14.11.19 - Leucocyanidin oxygenase / Leucoanthocyanidin dioxygenase
Glyma.14G059200.Wm82.a4.v1	(1 of 12) K05857 - phosphatidylinositol phospholipase C, delta (PLCD)
Glyma.14G061800.Wm82.a4.v1	(1 of 39) 2.3.1.133 - Shikimate O-hydroxycinnamoyltransferase
Glyma.14G063400.Wm82.a4.v1	(1 of 4) PTHR10641//PTHR10641:SF524 - MYB-LIKE DNA-BINDING PROTEIN MYB // ATMYB1 PROTEIN
Glyma.14G067500.Wm82.a4.v1	(1 of 38) PF08137 - DVL family (DVL)
Glyma.14G067700.Wm82.a4.v1	-
Glyma.14G074700.Wm82.a4.v1	(1 of 10) PF00560//PF07714//PF13855 - Leucine Rich Repeat (LRR_1) // Protein tyrosine kinase (Pkinase_Tyr) // Leucine rich repeat (LRR_8)
Glyma.14G080100.Wm82.a4.v1	(1 of 4) PTHR24361//PTHR24361:SF337 - MITOGEN-ACTIVATED KINASE KINASE KINASE // SUBFAMILY NOT NAMED
Glyma.14G080800.Wm82.a4.v1	(1 of 108) PF00149 - Calcineurin-like phosphoesterase (Metallophos)
Glyma.14G086500.Wm82.a4.v1	(1 of 2) PTHR10641//PTHR10641:SF644 - MYB-LIKE DNA-BINDING PROTEIN MYB // SUBFAMILY NOT NAMED
Glyma.14G087100.Wm82.a4.v1	(1 of 16) K06627 - cyclin A (CCNA)
Glyma.14G087200.Wm82.a4.v1	(1 of 3) PTHR23201//PTHR23201:SF4 - EXTENSIN, PROLINE-RICH PROTEIN // SUBFAMILY NOT NAMED
Glyma.14G089012.Wm82.a4.v1	(1 of 4) PTHR23083//PTHR23083:SF431 - TETRATRICOPEPTIDE REPEAT PROTEIN, TPR // SUBFAMILY NOT NAMED
Glyma.14G089015.Wm82.a4.v1	(1 of 4) PF15811 - Small VCP/p97-interacting protein (SVIP)
Glyma.14G089060.Wm82.a4.v1	(1 of 7) PTHR22849:SF6 - U-BOX DOMAIN-CONTAINING PROTEIN 30-RELATED
Glyma.14G090200.Wm82.a4.v1	(1 of 6) PTHR22950//PTHR22950:SF288 - AMINO ACID TRANSPORTER // SUBFAMILY NOT NAMED
Glyma.14G090400.Wm82.a4.v1	(1 of 8) 1.14.13.132//1.14.99.7 - Squalene monooxygenase / Squalene epoxidase // Transferred entry: 1.14.13.132
Glyma.14G090700.Wm82.a4.v1	(1 of 4) PTHR13018//PTHR13018:SF31 - PROBABLE MEMBRANE PROTEIN DUF221-RELATED // LIPASE/HYDROLASE
Glyma.14G098100.Wm82.a4.v1	(1 of 2) PTHR28039:SF3 - FATTY-ACID-BINDING PROTEIN 2
Glyma.14G104500.Wm82.a4.v1	(1 of 3) PTHR12136//PTHR12136:SF38 - STEROIDOGENIC ACUTE REGULATORY PROTEIN STAR // SUBFAMILY NOT NAMED
Glyma.14G106200.Wm82.a4.v1	(1 of 8) PTHR31985:SF34 - ETHYLENE-RESPONSIVE TRANSCRIPTION FACTOR ERF018
Glyma.14G112500.Wm82.a4.v1	-
Glyma.14G116300.Wm82.a4.v1	(1 of 58) PF02485 - Core-2/I-Branching enzyme (Branch)
Glyma.14G116400.Wm82.a4.v1	-
Glyma.14G135400.Wm82.a4.v1	(1 of 6) PTHR31282:SF15 - WRKY TRANSCRIPTION FACTOR 11-RELATED
Glyma.14G152700.Wm82.a4.v1	(1 of 3) PTHR31719//PTHR31719:SF16 - FAMILY NOT NAMED // NAC DOMAIN-CONTAINING PROTEIN 2
Glyma.14G162100.Wm82.a4.v1	(1 of 2) PTHR13832//PTHR13832:SF326 - PROTEIN PHOSPHATASE 2C // SUBFAMILY NOT NAMED
Glyma.14G162300.Wm82.a4.v1	(1 of 1) PF00310//PF01493//PF01645//PF04898//PF07992//PF13450//PF14691 - Glutamine amidotransferases class-II (GATase_2) // GXGXG motif (GXGXG) // Conserved region in glutamate synthase (Glu_synthase) // Glutamate synthase central domain (Glu_syn_central) // Pyridine nucleotide-disulphide oxidoreductase (Pyr_redox_2) // NAD(P)-binding Rossmann-like domain (NAD_binding_8) // Dihydroprymidine dehyd…
Glyma.14G171500.Wm82.a4.v1	(1 of 16) PTHR31657//PTHR31657:SF9 - FAMILY NOT NAMED // ETHYLENE-RESPONSIVE TRANSCRIPTION FACTOR CRF5-RELATED
Glyma.14G172300.Wm82.a4.v1	(1 of 1) PTHR23505//PTHR23505:SF15 - FAMILY NOT NAMED // MAJOR FACILITATOR PROTEIN
Glyma.14G175400.Wm82.a4.v1	(1 of 8) PTHR11926//PTHR11926:SF286 - GLUCOSYL/GLUCURONOSYL TRANSFERASES // SUBFAMILY NOT NAMED
Glyma.14G179200.Wm82.a4.v1	(1 of 3) PTHR22778//PTHR22778:SF19 - OVARIAN CANCER GENE-2 PROTEIN-RELATED // SUBFAMILY NOT NAMED
Glyma.14G186400.Wm82.a4.v1	-
Glyma.14G194100.Wm82.a4.v1	(1 of 4) PTHR14493//PTHR14493:SF54 - UNCHARACTERIZED // ZINC FINGER CCCH DOMAIN-CONTAINING PROTEIN 66
Glyma.14G195200.Wm82.a4.v1	(1 of 5) PTHR13832//PTHR13832:SF117 - PROTEIN PHOSPHATASE 2C // PROTEIN PHOSPHATASE 2C-LIKE PROTEIN-RELATED
Glyma.14G195300.Wm82.a4.v1	(1 of 4) PTHR24361:SF390 - F10K1.14 PROTEIN-RELATED
Glyma.14G200200.Wm82.a4.v1	(1 of 8) K13424 - WRKY transcription factor 33 (WRKY33)
Glyma.14G205100.Wm82.a4.v1	(1 of 4) PTHR32258:SF4 - KINASE INTERACTING (KIP1-LIKE) FAMILY PROTEIN
Glyma.14G212200.Wm82.a4.v1	(1 of 4) PTHR22849//PTHR22849:SF43 - WDSAM1 PROTEIN // U-BOX DOMAIN-CONTAINING PROTEIN 54-RELATED
Glyma.14G215700.Wm82.a4.v1	(1 of 4) KOG4467 - Uncharacterized conserved protein
Glyma.14G215800.Wm82.a4.v1	(1 of 10) PTHR10891:SF573 - CALCIUM-BINDING PROTEIN CML24-RELATED
Glyma.14G220100.Wm82.a4.v1	-
Glyma.14G220200.Wm82.a4.v1	(1 of 2) PTHR24221//PTHR24221:SF235 - FAMILY NOT NAMED // ABC TRANSPORTER B FAMILY MEMBER 13-RELATED
Glyma.14G220400.Wm82.a4.v1	-
Glyma.14G222400.Wm82.a4.v1	-
Glyma.14G223200.Wm82.a4.v1	(1 of 2) PTHR24096//PTHR24096:SF186 - FAMILY NOT NAMED // 4-COUMARATE--COA LIGASE-LIKE 2-RELATED
Glyma.15G008300.Wm82.a4.v1	-
Glyma.15G017000.Wm82.a4.v1	(1 of 6) PTHR11654:SF157 - PROTEIN NRT1/ PTR FAMILY 1.1-RELATED
Glyma.15G022000.Wm82.a4.v1	(1 of 4) PTHR12565:SF174 - TRANSCRIPTION FACTOR BHLH87
Glyma.15G022800.Wm82.a4.v1	(1 of 79) PF02701 - Dof domain, zinc finger (zf-Dof)
Glyma.15G046900.Wm82.a4.v1	(1 of 87) PF12937 - F-box-like (F-box-like)
Glyma.15G047100.Wm82.a4.v1	(1 of 12) PF04842 - Plant protein of unknown function (DUF639) (DUF639)
Glyma.15G052600.Wm82.a4.v1	(1 of 4) PTHR31235//PTHR31235:SF27 - FAMILY NOT NAMED // PEROXIDASE 62-RELATED
Glyma.15G055800.Wm82.a4.v1	-
Glyma.15G063400.Wm82.a4.v1	(1 of 2) K02553 - regulator of ribonuclease activity A (rraA, menG)
Glyma.15G065100.Wm82.a4.v1	(1 of 3) PTHR27002//PTHR27002:SF93 - FAMILY NOT NAMED // RECEPTOR-LIKE SERINE/THREONINE-PROTEIN KINASE SD1-6-RELATED
Glyma.15G067100.Wm82.a4.v1	(1 of 2) PTHR10809:SF46 - VESICLE-ASSOCIATED PROTEIN 4-2-RELATED
Glyma.15G071800.Wm82.a4.v1	(1 of 67) PF00083 - Sugar (and other) transporter (Sugar_tr)
Glyma.15G072500.Wm82.a4.v1	(1 of 4) K01652 - acetolactate synthase I/II/III large subunit (E2.2.1.6L, ilvB, ilvG, ilvI)
Glyma.15G077100.Wm82.a4.v1	(1 of 349) PF00847 - AP2 domain (AP2)
Glyma.15G078200.Wm82.a4.v1	(1 of 4) PTHR27001//PTHR27001:SF39 - FAMILY NOT NAMED // PROTEIN KINASE FAMILY PROTEIN
Glyma.15G078400.Wm82.a4.v1	(1 of 5) PTHR10751//PTHR10751:SF44 - GUANYLATE BINDING PROTEIN // SUBFAMILY NOT NAMED
Glyma.15G078600.Wm82.a4.v1	(1 of 3) PTHR10168:SF69 - GLUTAREDOXIN-C9
Glyma.15G079100.Wm82.a4.v1	(1 of 349) PF00847 - AP2 domain (AP2)
Glyma.15G088100.Wm82.a4.v1	(1 of 2) PTHR33199:SF3 - MACPF DOMAIN-CONTAINING PROTEIN CAD1
Glyma.15G088500.Wm82.a4.v1	(1 of 6) PTHR23257//PTHR23257:SF378 - SERINE-THREONINE PROTEIN KINASE // INTEGRIN-LINKED PROTEIN KINASE FAMILY PROTEIN-RELATED
Glyma.15G090500.Wm82.a4.v1	-
Glyma.15G091600.Wm82.a4.v1	(1 of 2) PTHR13018:SF22 - EARLY-RESPONSIVE TO DEHYDRATION STRESS PROTEIN (ERD4)
Glyma.15G093100.Wm82.a4.v1	(1 of 7) PTHR33077:SF17 - PROTEIN TIFY 5A-RELATED
Glyma.15G093900.Wm82.a4.v1	(1 of 5) PTHR10209//PTHR10209:SF171 - OXIDOREDUCTASE, 2OG-FE II OXYGENASE FAMILY PROTEIN // GIBBERELLIN 2-BETA-DIOXYGENASE 2-RELATED
Glyma.15G110300.Wm82.a4.v1	(1 of 176) PF03106 - WRKY DNA -binding domain (WRKY)
Glyma.15G111000.Wm82.a4.v1	(1 of 2) PTHR31042//PTHR31042:SF2 - FAMILY NOT NAMED // CORE-2/I-BRANCHING BETA-1,6-N-ACETYLGLUCOSAMINYLTRANSFERASE FAMILY PROTEIN
Glyma.15G111600.Wm82.a4.v1	(1 of 4) PTHR27001//PTHR27001:SF21 - FAMILY NOT NAMED // PROTEIN STRUBBELIG-RECEPTOR FAMILY 6-RELATED
Glyma.15G115600.Wm82.a4.v1	(1 of 5) PTHR23130//PTHR23130:SF80 - FAMILY NOT NAMED // AUXIN-INDUCED IN ROOT CULTURES PROTEIN 12
Glyma.15G124400.Wm82.a4.v1	(1 of 21) PF09335 - SNARE associated Golgi protein (SNARE_assoc)
Glyma.15G128300.Wm82.a4.v1	(1 of 20) KOG0513 - Ca2+-independent phospholipase A2
Glyma.15G131200.Wm82.a4.v1	(1 of 2) 1.1.1.31 - 3-hydroxyisobutyrate dehydrogenase
Glyma.15G132800.Wm82.a4.v1	(1 of 11) PTHR32448:SF34 - F22M8.11 PROTEIN-RELATED
Glyma.15G148000.Wm82.a4.v1	(1 of 5) K08238 - xyloglucan 6-xylosyltransferase [EC:2.4.2.39] Xyl a1-6 Glc (XXT)
Glyma.15G152900.Wm82.a4.v1	(1 of 191) PF00168 - C2 domain (C2)
Glyma.15G168200.Wm82.a4.v1	(1 of 16) PF03106//PF10533 - WRKY DNA -binding domain (WRKY) // Plant zinc cluster domain (Plant_zn_clust)
Glyma.15G202600.Wm82.a4.v1	(1 of 4) PTHR35121:SF2 - GB|AAD20160.1
Glyma.15G206100.Wm82.a4.v1	(1 of 2) PTHR31713:SF11 - CALMODULIN-BINDING PROTEIN-RELATED
Glyma.15G209300.Wm82.a4.v1	(1 of 120) PF00560//PF08263//PF13855 - Leucine Rich Repeat (LRR_1) // Leucine rich repeat N-terminal domain (LRRNT_2) // Leucine rich repeat (LRR_8)
Glyma.15G210300.Wm82.a4.v1	(1 of 7) K12450 - UDP-glucose 4,6-dehydratase (RHM)
Glyma.15G211300.Wm82.a4.v1	(1 of 6) 1.1.1.198 - (+)-borneol dehydrogenase
Glyma.15G218400.Wm82.a4.v1	(1 of 5) PTHR31284//PTHR31284:SF7 - FAMILY NOT NAMED // ACID PHOSPHATASE-RELATED
Glyma.15G227500.Wm82.a4.v1	(1 of 2) PTHR11413//PTHR11413:SF55 - CYSTATIN FAMILY MEMBER // CYSTEINE PROTEINASE INHIBITOR 6
Glyma.15G234200.Wm82.a4.v1	(1 of 3) PTHR23315//PTHR23315:SF57 - BETA CATENIN-RELATED ARMADILLO REPEAT-CONTAINING // ARMADILLO/BETA-CATENIN-LIKE REPEAT-CONTAINING PROTEIN
Glyma.15G250100.Wm82.a4.v1	(1 of 2) PTHR10543//PTHR10543:SF26 - BETA-CAROTENE DIOXYGENASE // 9-CIS-EPOXYCAROTENOID DIOXYGENASE NCED3, CHLOROPLASTIC-RELATED
Glyma.15G251500.Wm82.a4.v1	(1 of 3) PTHR11260:SF204 - GLUTATHIONE S-TRANSFERASE U21-RELATED
Glyma.15G256000.Wm82.a4.v1	(1 of 11) PTHR31568:SF17 - EXPRESSED PROTEIN
Glyma.15G258100.Wm82.a4.v1	(1 of 6) PTHR31301//PTHR31301:SF15 - FAMILY NOT NAMED // LOB DOMAIN-CONTAINING PROTEIN 4
Glyma.15G261300.Wm82.a4.v1	(1 of 8) K08066 - nuclear transcription factor Y, gamma (NFYC)
Glyma.15G263600.Wm82.a4.v1	(1 of 7) PTHR17204//PTHR17204:SF28 - PRE-MRNA PROCESSING PROTEIN PRP39-RELATED // F1C9.34 PROTEIN-RELATED
Glyma.15G267900.Wm82.a4.v1	(1 of 2) PTHR11527//PTHR11527:SF161 - SMALL HEAT-SHOCK PROTEIN HSP20 FAMILY // SUBFAMILY NOT NAMED
Glyma.15G270200.Wm82.a4.v1	(1 of 2) PTHR21091:SF16 - SIROHEME SYNTHASE
Glyma.15G272300.Wm82.a4.v1	(1 of 4) PTHR10634:SF22 - ZINC FINGER A20 AND AN1 DOMAIN-CONTAINING STRESS-ASSOCIATED PROTEIN 5
Glyma.16G008400.Wm82.a4.v1	(1 of 2) 2.7.6.5//3.2.1.37//3.2.1.55 - GTP diphosphokinase / Stringent factor // Xylan 1,4-beta-xylosidase / Xylobiase // Non-reducing end alpha-L-arabinofuranosidase / Arabinosidase
Glyma.16G008700.Wm82.a4.v1	(1 of 5) PTHR11771//PTHR11771:SF38 - LIPOXYGENASE // LIPOXYGENASE 3, CHLOROPLASTIC-RELATED
Glyma.16G011900.Wm82.a4.v1	(1 of 235) PF02519 - Auxin responsive protein (Auxin_inducible)
Glyma.16G014000.Wm82.a4.v1	(1 of 3) PTHR31707:SF42 - PECTINESTERASE 1-RELATED
Glyma.16G029000.Wm82.a4.v1	(1 of 2) KOG3584 - cAMP response element binding protein and related transcription factors
Glyma.16G030700.Wm82.a4.v1	(1 of 6) PTHR10994:SF70 - RETICULON-LIKE PROTEIN B4
Glyma.16G031800.Wm82.a4.v1	(1 of 1) PTHR24015//PTHR24015:SF771 - FAMILY NOT NAMED // F21B23.6 PROTEIN
Glyma.16G031900.Wm82.a4.v1	(1 of 4) K13425 - WRKY transcription factor 22 (WRKY22)
Glyma.16G037900.Wm82.a4.v1	-
Glyma.16G038300.Wm82.a4.v1	(1 of 6) K00549 - 5-methyltetrahydropteroyltriglutamate--homocysteine methyltransferase (metE)
Glyma.16G039800.Wm82.a4.v1	-
Glyma.16G051300.Wm82.a4.v1	(1 of 5) PTHR22753//PTHR22753:SF8 - FAMILY NOT NAMED // ESTERASE/LIPASE/THIOESTERASE FAMILY PROTEIN-RELATED
Glyma.16G056300.Wm82.a4.v1	(1 of 4) K10808 - ribonucleoside-diphosphate reductase subunit M2 (RRM2)
Glyma.16G059400.Wm82.a4.v1	(1 of 2) PTHR23359//PTHR23359:SF86 - NUCLEOTIDE KINASE // SUBFAMILY NOT NAMED
Glyma.16G063600.Wm82.a4.v1	(1 of 273) PF00646 - F-box domain (F-box)
Glyma.16G084300.Wm82.a4.v1	(1 of 5) PTHR23130//PTHR23130:SF80 - FAMILY NOT NAMED // AUXIN-INDUCED IN ROOT CULTURES PROTEIN 12
Glyma.16G084700.Wm82.a4.v1	(1 of 3) PTHR24351//PTHR24351:SF69 - RIBOSOMAL PROTEIN S6 KINASE // AGC (CAMP-DEPENDENT, CGMP-DEPENDENT AND PROTEIN KINASE C) KINASE FAMILY PROTEIN-RELATED
Glyma.16G103900.Wm82.a4.v1	(1 of 3) 1.23.1.1//1.23.1.4 - (+)-pinoresinol reductase / Pinoresinol/lariciresinol reductase // (-)-lariciresinol reductase / Pinoresinol/lariciresinol reductase
Glyma.16G107000.Wm82.a4.v1	(1 of 4) PTHR21576:SF7 - MAJOR FACILITATOR PROTEIN-RELATED
Glyma.16G109900.Wm82.a4.v1	-
Glyma.16G113000.Wm82.a4.v1	(1 of 7) 1.1.1.34 - Hydroxymethylglutaryl-CoA reductase (NADPH) / HMG-CoA reductase
Glyma.16G115600.Wm82.a4.v1	(1 of 2) PTHR24015:SF469 - PENTATRICOPEPTIDE REPEAT-CONTAINING PROTEIN
Glyma.16G138300.Wm82.a4.v1	(1 of 6) PTHR22849//PTHR22849:SF40 - WDSAM1 PROTEIN // U-BOX DOMAIN-CONTAINING PROTEIN 5
Glyma.16G145500.Wm82.a4.v1	(1 of 6) PTHR31942//PTHR31942:SF29 - FAMILY NOT NAMED // MLO-LIKE PROTEIN 12-RELATED
Glyma.16G152600.Wm82.a4.v1	(1 of 5) PTHR32227:SF95 - GLUCAN ENDO-1,3-BETA-GLUCOSIDASE 8-RELATED
Glyma.16G155000.Wm82.a4.v1	(1 of 8) PTHR19139//PTHR19139:SF167 - AQUAPORIN TRANSPORTER // AQUAPORIN PIP2-1-RELATED
Glyma.16G155100.Wm82.a4.v1	(1 of 8) PTHR19139//PTHR19139:SF167 - AQUAPORIN TRANSPORTER // AQUAPORIN PIP2-1-RELATED
Glyma.16G155300.Wm82.a4.v1	(1 of 4) PTHR10071:SF194 - GATA TRANSCRIPTION FACTOR 8
Glyma.16G156800.Wm82.a4.v1	(1 of 11) K15378 - solute carrier family 45, member 1/2/4 (SLC45A1_2_4)
Glyma.16G165600.Wm82.a4.v1	-
Glyma.16G175200.Wm82.a4.v1	(1 of 10) 2.4.1.170 - Isoflavone 7-O-glucosyltransferase
Glyma.16G175300.Wm82.a4.v1	(1 of 10) 2.4.1.170 - Isoflavone 7-O-glucosyltransferase
Glyma.16G178000.Wm82.a4.v1	(1 of 17) PTHR22814//PTHR22814:SF129 - COPPER TRANSPORT PROTEIN ATOX1-RELATED // COPPER TRANSPORT FAMILY PROTEIN-RELATED
Glyma.16G178400.Wm82.a4.v1	(1 of 17) PTHR22814//PTHR22814:SF129 - COPPER TRANSPORT PROTEIN ATOX1-RELATED // COPPER TRANSPORT FAMILY PROTEIN-RELATED
Glyma.16G178500.Wm82.a4.v1	(1 of 17) PTHR22814//PTHR22814:SF129 - COPPER TRANSPORT PROTEIN ATOX1-RELATED // COPPER TRANSPORT FAMILY PROTEIN-RELATED
Glyma.16G210500.Wm82.a4.v1	(1 of 49) KOG0472//KOG1187 - Leucine-rich repeat protein // Serine/threonine protein kinase
Glyma.16G218200.Wm82.a4.v1	(1 of 9) PTHR10217:SF475 - CYCLIC NUCLEOTIDE-GATED ION CHANNEL 19-RELATED
Glyma.16G220400.Wm82.a4.v1	(1 of 4) PTHR11452//PTHR11452:SF18 - ALPHA-GALACTOSIDASE/ALPHA-N-ACETYLGALACTOSAMINIDASE // ALPHA-GALACTOSIDASE 1
Glyma.17G002100.Wm82.a4.v1	(1 of 11) KOG4249 - Uncharacterized conserved protein
Glyma.17G007600.Wm82.a4.v1	(1 of 4) PTHR31636:SF45 - SCARECROW-LIKE PROTEIN 13
Glyma.17G010500.Wm82.a4.v1	(1 of 6) PTHR13018//PTHR13018:SF47 - PROBABLE MEMBRANE PROTEIN DUF221-RELATED // ERD (EARLY-RESPONSIVE TO DEHYDRATION STRESS) FAMILY PROTEIN-RELATED
Glyma.17G011400.Wm82.a4.v1	(1 of 176) PF03106 - WRKY DNA -binding domain (WRKY)
Glyma.17G013900.Wm82.a4.v1	(1 of 28) PF04520 - Senescence regulator (Senescence_reg)
Glyma.17G014000.Wm82.a4.v1	(1 of 6) PTHR31071//PTHR31071:SF14 - FAMILY NOT NAMED // F25C20.16
Glyma.17G014900.Wm82.a4.v1	(1 of 2) KOG0165 - Microtubule-associated protein Asp
Glyma.17G017400.Wm82.a4.v1	(1 of 1) PF01715//PF01745 - IPP transferase (IPPT) // Isopentenyl transferase (IPT)
Glyma.17G020900.Wm82.a4.v1	(1 of 4) PTHR31621//PTHR31621:SF1 - FAMILY NOT NAMED // DUF679 DOMAIN MEMBRANE PROTEIN 1
Glyma.17G026300.Wm82.a4.v1	-
Glyma.17G028400.Wm82.a4.v1	(1 of 5) PTHR14155//PTHR14155:SF117 - RING FINGER DOMAIN-CONTAINING // E3 UBIQUITIN-PROTEIN LIGASE ATL41-RELATED
Glyma.17G029000.Wm82.a4.v1	-
Glyma.17G029200.Wm82.a4.v1	(1 of 5) PTHR13832//PTHR13832:SF198 - PROTEIN PHOSPHATASE 2C // PROTEIN PHOSPHATASE 2C 34-RELATED
Glyma.17G030700.Wm82.a4.v1	(1 of 3) PTHR31052//PTHR31052:SF3 - FAMILY NOT NAMED // COBRA-LIKE PROTEIN 7-RELATED
Glyma.17G030800.Wm82.a4.v1	-
Glyma.17G035400.Wm82.a4.v1	(1 of 4) PTHR31221//PTHR31221:SF13 - FAMILY NOT NAMED // WRKY TRANSCRIPTION FACTOR 48-RELATED
Glyma.17G038800.Wm82.a4.v1	(1 of 1) PTHR23335//PTHR23335:SF10 - CALMODULIN-BINDING TRANSCRIPTION ACTIVATOR CAMTA // SUBFAMILY NOT NAMED
Glyma.17G047700.Wm82.a4.v1	(1 of 8) PTHR33077:SF13 - PROTEIN TIFY 10A-RELATED
Glyma.17G048100.Wm82.a4.v1	(1 of 5) PTHR10338//PTHR10338:SF114 - VON WILLEBRAND FACTOR, TYPE A DOMAIN CONTAINING // SUBFAMILY NOT NAMED
Glyma.17G048900.Wm82.a4.v1	(1 of 5) PTHR27001:SF123 - SER/THR PROTEIN KINASE ACIK1B
Glyma.17G049200.Wm82.a4.v1	-
Glyma.17G049300.Wm82.a4.v1	-
Glyma.17G049900.Wm82.a4.v1	(1 of 4) PTHR22893//PTHR22893:SF67 - NADH OXIDOREDUCTASE-RELATED // 12-OXOPHYTODIENOATE REDUCTASE 3
Glyma.17G055600.Wm82.a4.v1	-
Glyma.17G056900.Wm82.a4.v1	(1 of 22) K04730 - interleukin-1 receptor-associated kinase 1 (IRAK1)
Glyma.17G057100.Wm82.a4.v1	(1 of 16) PF03106//PF10533 - WRKY DNA -binding domain (WRKY) // Plant zinc cluster domain (Plant_zn_clust)
Glyma.17G058600.Wm82.a4.v1	(1 of 310) PF00010 - Helix-loop-helix DNA-binding domain (HLH)
Glyma.17G061800.Wm82.a4.v1	(1 of 22) K01535 - H+-transporting ATPase (E3.6.3.6)
Glyma.17G065100.Wm82.a4.v1	(1 of 9) PTHR31062//PTHR31062:SF32 - FAMILY NOT NAMED // XYLOGLUCAN ENDOTRANSGLUCOSYLASE/HYDROLASE PROTEIN 25-RELATED
Glyma.17G065200.Wm82.a4.v1	(1 of 9) PTHR31062//PTHR31062:SF32 - FAMILY NOT NAMED // XYLOGLUCAN ENDOTRANSGLUCOSYLASE/HYDROLASE PROTEIN 25-RELATED
Glyma.17G065300.Wm82.a4.v1	(1 of 9) PTHR31062//PTHR31062:SF32 - FAMILY NOT NAMED // XYLOGLUCAN ENDOTRANSGLUCOSYLASE/HYDROLASE PROTEIN 25-RELATED
Glyma.17G065400.Wm82.a4.v1	(1 of 1) K14504 - xyloglucan:xyloglucosyl transferase TCH4 (TCH4)
Glyma.17G089400.Wm82.a4.v1	(1 of 3) PTHR32263:SF6 - INACTIVE POLY [ADP-RIBOSE] POLYMERASE SRO4-RELATED
Glyma.17G090900.Wm82.a4.v1	(1 of 3) PTHR23315//PTHR23315:SF116 - BETA CATENIN-RELATED ARMADILLO REPEAT-CONTAINING // U-BOX DOMAIN-CONTAINING PROTEIN 18-RELATED
Glyma.17G091500.Wm82.a4.v1	(1 of 2) PTHR23079:SF5 - RNA-DEPENDENT RNA POLYMERASE 2
Glyma.17G092800.Wm82.a4.v1	(1 of 9) PTHR23201//PTHR23201:SF18 - EXTENSIN, PROLINE-RICH PROTEIN // SUBFAMILY NOT NAMED
Glyma.17G093900.Wm82.a4.v1	(1 of 8) PTHR26402:SF526 - TWO-COMPONENT RESPONSE REGULATOR ARR15-RELATED
Glyma.17G096500.Wm82.a4.v1	(1 of 33) PF00069//PF08263 - Protein kinase domain (Pkinase) // Leucine rich repeat N-terminal domain (LRRNT_2)
Glyma.17G098100.Wm82.a4.v1	-
Glyma.17G103400.Wm82.a4.v1	(1 of 78) PF00069//PF00560//PF08263//PF13855 - Protein kinase domain (Pkinase) // Leucine Rich Repeat (LRR_1) // Leucine rich repeat N-terminal domain (LRRNT_2) // Leucine rich repeat (LRR_8)
Glyma.17G104300.Wm82.a4.v1	-
Glyma.17G104600.Wm82.a4.v1	(1 of 4) PTHR35121:SF2 - GB|AAD20160.1
Glyma.17G105000.Wm82.a4.v1	-
Glyma.17G107200.Wm82.a4.v1	(1 of 2) PTHR30508:SF1 - UPF0051 PROTEIN ABCI8, CHLOROPLASTIC-RELATED
Glyma.17G108400.Wm82.a4.v1	(1 of 1) PTHR10209//PTHR10209:SF218 - OXIDOREDUCTASE, 2OG-FE II OXYGENASE FAMILY PROTEIN // SUBFAMILY NOT NAMED
Glyma.17G109300.Wm82.a4.v1	-
Glyma.17G115800.Wm82.a4.v1	-
Glyma.17G118300.Wm82.a4.v1	(1 of 2) PF00027//PF00520//PF07885//PF11834//PF12796//PF13857 - Cyclic nucleotide-binding domain (cNMP_binding) // Ion transport protein (Ion_trans) // Ion channel (Ion_trans_2) // KHA, dimerisation domain of potassium ion channel (KHA) // Ankyrin repeats (3 copies) (Ank_2) // Ankyrin repeats (many copies) (Ank_5)
Glyma.17G123800.Wm82.a4.v1	(1 of 18) K01530 - phospholipid-translocating ATPase (E3.6.3.1)
Glyma.17G126400.Wm82.a4.v1	(1 of 4) PTHR24413//PTHR24413:SF75 - FAMILY NOT NAMED // BTB/POZ AND TAZ DOMAIN-CONTAINING PROTEIN 2
Glyma.17G128900.Wm82.a4.v1	(1 of 6) PTHR10891//PTHR10891:SF621 - EF-HAND CALCIUM-BINDING DOMAIN CONTAINING PROTEIN // SUBFAMILY NOT NAMED
Glyma.17G131600.Wm82.a4.v1	(1 of 2) PTHR12329//PTHR12329:SF13 - BCL2-ASSOCIATED ATHANOGENE // SUBFAMILY NOT NAMED
Glyma.17G131900.Wm82.a4.v1	(1 of 3) PTHR31839//PTHR31839:SF0 - FAMILY NOT NAMED // DEHYDRATION-RESPONSIVE ELEMENT-BINDING PROTEIN 1E-RELATED
Glyma.17G136300.Wm82.a4.v1	(1 of 4) PTHR31096:SF6 - ACR7-RELATED
Glyma.17G145900.Wm82.a4.v1	(1 of 4) PTHR31403//PTHR31403:SF2 - FAMILY NOT NAMED // PHOSPHOLIPASE A1-IBETA2, CHLOROPLASTIC
Glyma.17G146100.Wm82.a4.v1	(1 of 7) K07874 - Ras-related protein Rab-1A (RAB1A)
Glyma.17G155700.Wm82.a4.v1	(1 of 37) PTHR22880 - FALZ-RELATED BROMODOMAIN-CONTAINING PROTEINS
Glyma.17G156300.Wm82.a4.v1	(1 of 1) PTHR27000:SF174 - LEUCINE-RICH REPEAT RECEPTOR-LIKE SERINE/THREONINE-PROTEIN KINASE BAM1
Glyma.17G160200.Wm82.a4.v1	(1 of 22) PF12734 - Cysteine-rich TM module stress tolerance (CYSTM)
Glyma.17G165300.Wm82.a4.v1	(1 of 19) K14487 - auxin responsive GH3 gene family (GH3)
Glyma.17G167800.Wm82.a4.v1	(1 of 6) PTHR24006//PTHR24006:SF481 - FAMILY NOT NAMED // F-BOX PROTEIN SKIP2
Glyma.17G168900.Wm82.a4.v1	(1 of 4) PTHR31282//PTHR31282:SF33 - FAMILY NOT NAMED // WRKY TRANSCRIPTION FACTOR 15-RELATED
Glyma.17G169800.Wm82.a4.v1	(1 of 8) PTHR31729:SF0 - ETHYLENE-RESPONSIVE TRANSCRIPTION FACTOR ERF008-RELATED
Glyma.17G185000.Wm82.a4.v1	(1 of 171) PF02365 - No apical meristem (NAM) protein (NAM)
Glyma.17G192000.Wm82.a4.v1	(1 of 4) PTHR22950//PTHR22950:SF278 - AMINO ACID TRANSPORTER // AMINO ACID PERMEASE 1-RELATED
Glyma.17G197500.Wm82.a4.v1	(1 of 6) PTHR31282:SF15 - WRKY TRANSCRIPTION FACTOR 11-RELATED
Glyma.17G216500.Wm82.a4.v1	(1 of 30) PF05910 - Plant protein of unknown function (DUF868) (DUF868)
Glyma.17G219700.Wm82.a4.v1	(1 of 8) PTHR31985:SF34 - ETHYLENE-RESPONSIVE TRANSCRIPTION FACTOR ERF018
Glyma.17G224700.Wm82.a4.v1	(1 of 29) PF10358 - N-terminal C2 in EEIG1 and EHBP1 proteins (NT-C2)
Glyma.17G232235.Wm82.a4.v1	(1 of 4) PTHR13018//PTHR13018:SF31 - PROBABLE MEMBRANE PROTEIN DUF221-RELATED // LIPASE/HYDROLASE
Glyma.17G235000.Wm82.a4.v1	(1 of 4) PTHR23083//PTHR23083:SF431 - TETRATRICOPEPTIDE REPEAT PROTEIN, TPR // SUBFAMILY NOT NAMED
Glyma.17G236900.Wm82.a4.v1	(1 of 1) PTHR19957//PTHR19957:SF118//PTHR34949//PTHR34949:SF1 - SYNTAXIN // SUBFAMILY NOT NAMED // FAMILY NOT NAMED // SUBFAMILY NOT NAMED
Glyma.17G240100.Wm82.a4.v1	(1 of 8) PTHR31729:SF0 - ETHYLENE-RESPONSIVE TRANSCRIPTION FACTOR ERF008-RELATED
Glyma.17G240700.Wm82.a4.v1	(1 of 171) PF02365 - No apical meristem (NAM) protein (NAM)
Glyma.17G244600.Wm82.a4.v1	(1 of 108) PF00149 - Calcineurin-like phosphoesterase (Metallophos)
Glyma.17G247900.Wm82.a4.v1	(1 of 4) PTHR13778:SF6 - GALACTURONOSYLTRANSFERASE-LIKE 1-RELATED
Glyma.17G255800.Wm82.a4.v1	(1 of 6) PTHR13690//PTHR13690:SF76 - FAMILY NOT NAMED // BASIC-LEUCINE ZIPPER (BZIP) TRANSCRIPTION FACTOR FAMILY PROTEIN
Glyma.17G256900.Wm82.a4.v1	(1 of 6) PTHR31580//PTHR31580:SF4 - FAMILY NOT NAMED // FILAMENT-LIKE PLANT PROTEIN 4-RELATED
Glyma.17G261800.Wm82.a4.v1	(1 of 3) PTHR27001:SF3 - F2D10.13-RELATED
Glyma.18G003700.Wm82.a4.v1	(1 of 3) PTHR11413:SF38 - CYSTEINE PROTEINASE INHIBITOR 2
Glyma.18G006700.Wm82.a4.v1	(1 of 8) PF05755 - Rubber elongation factor protein (REF) (REF)
Glyma.18G007400.Wm82.a4.v1	(1 of 2) PTHR12771//PTHR12771:SF19 - ENGULFMENT AND CELL MOTILITY // ELMO/CED-12 DOMAIN-CONTAINING PROTEIN-RELATED
Glyma.18G009800.Wm82.a4.v1	(1 of 7) PF06522 - NADH-ubiquinone reductase complex 1 MLRQ subunit (B12D)
Glyma.18G017700.Wm82.a4.v1	-
Glyma.18G020600.Wm82.a4.v1	-
Glyma.18G022700.Wm82.a4.v1	(1 of 10) PF07107 - Wound-induced protein WI12 (WI12)
Glyma.18G025100.Wm82.a4.v1	(1 of 27) PF07714//PF08263 - Protein tyrosine kinase (Pkinase_Tyr) // Leucine rich repeat N-terminal domain (LRRNT_2)
Glyma.18G026700.Wm82.a4.v1	(1 of 11) PTHR27003//PTHR27003:SF102 - FAMILY NOT NAMED // SERINE/THREONINE-PROTEIN KINASE-LIKE PROTEIN CCR3-RELATED
Glyma.18G035000.Wm82.a4.v1	(1 of 4) PTHR13832//PTHR13832:SF219 - PROTEIN PHOSPHATASE 2C // PROTEIN PHOSPHATASE 2C 3-RELATED
Glyma.18G039500.Wm82.a4.v1	(1 of 10) PTHR10891:SF573 - CALCIUM-BINDING PROTEIN CML24-RELATED
Glyma.18G044200.Wm82.a4.v1	(1 of 4) PTHR12802//PTHR12802:SF60 - SWI/SNF COMPLEX-RELATED // PROTEIN REVEILLE 1-RELATED
Glyma.18G050600.Wm82.a4.v1	(1 of 6) K02866 - large subunit ribosomal protein L10e (RP-L10e, RPL10)
Glyma.18G054600.Wm82.a4.v1	(1 of 5) PTHR24347//PTHR24347:SF220 - SERINE/THREONINE-PROTEIN KINASE // CBL-INTERACTING SERINE/THREONINE-PROTEIN KINASE 11
Glyma.18G061100.Wm82.a4.v1	(1 of 7) K01953 - asparagine synthase (glutamine-hydrolysing) (asnB, ASNS)
Glyma.18G064900.Wm82.a4.v1	(1 of 4) PTHR11654//PTHR11654:SF166 - OLIGOPEPTIDE TRANSPORTER-RELATED // SUBFAMILY NOT NAMED
Glyma.18G067800.Wm82.a4.v1	(1 of 3) K04802 - proliferating cell nuclear antigen (PCNA)
Glyma.18G072300.Wm82.a4.v1	(1 of 233) PTHR24078 - DNAJ HOMOLOG SUBFAMILY C MEMBER
Glyma.18G091500.Wm82.a4.v1	(1 of 6) PTHR10366:SF362 - ALCOHOL DEHYDROGENASE-RELATED
Glyma.18G096500.Wm82.a4.v1	(1 of 2) PTHR24349:SF23 - MAP KINASE-ACTIVATED PROTEIN KINASE 5
Glyma.18G116300.Wm82.a4.v1	(1 of 4) PTHR10742:SF238 - POLYAMINE OXIDASE 3-RELATED
Glyma.18G118300.Wm82.a4.v1	(1 of 80) PF14009 - Domain of unknown function (DUF4228) (DUF4228)
Glyma.18G140300.Wm82.a4.v1	(1 of 5) 3.4.19.3 - Pyroglutamyl-peptidase I / Pyrrolidone-carboxylate peptidase
Glyma.18G153800.Wm82.a4.v1	-
Glyma.18G158400.Wm82.a4.v1	(1 of 108) 3.6.3.44 - Xenobiotic-transporting ATPase / Steroid-transporting ATPase
Glyma.18G183451.Wm82.a4.v1	-
Glyma.18G190200.Wm82.a4.v1	(1 of 11) PTHR11260//PTHR11260:SF314 - GLUTATHIONE S-TRANSFERASE, GST, SUPERFAMILY, GST DOMAIN CONTAINING // SUBFAMILY NOT NAMED
Glyma.18G201850.Wm82.a4.v1	(1 of 7) PTHR10209:SF134 - 2-OXOGLUTARATE (2OG) AND FE(II)-DEPENDENT OXYGENASE-LIKE PROTEIN
Glyma.18G201900.Wm82.a4.v1	(1 of 11) 1.14.11.19 - Leucocyanidin oxygenase / Leucoanthocyanidin dioxygenase
Glyma.18G202400.Wm82.a4.v1	(1 of 4) PTHR10032//PTHR10032:SF215 - ZINC FINGER PROTEIN WITH KRAB AND SCAN DOMAINS // TRIHELIX TRANSCRIPTION FACTOR GT-3A-RELATED
Glyma.18G202600.Wm82.a4.v1	(1 of 5) 1.14.99.33 - Delta(12)-fatty acid dehydrogenase / Linoleate Delta-12-fatty acid acetylenase (desaturase)
Glyma.18G204800.Wm82.a4.v1	(1 of 4) PTHR11730//PTHR11730:SF38 - AMMONIUM TRANSPORTER // AMMONIUM TRANSPORTER 2
Glyma.18G205700.Wm82.a4.v1	-
Glyma.18G214000.Wm82.a4.v1	(1 of 2227) 2.7.11.1 - Non-specific serine/threonine protein kinase / Threonine-specific protein kinase
Glyma.18G223900.Wm82.a4.v1	(1 of 85) PF02298 - Plastocyanin-like domain (Cu_bind_like)
Glyma.18G225300.Wm82.a4.v1	(1 of 17) PTHR32246:SF20 - BON1-ASSOCIATED PROTEIN 1-RELATED
Glyma.18G227100.Wm82.a4.v1	(1 of 4) PTHR22844//PTHR22844:SF176 - F-BOX AND WD40 DOMAIN PROTEIN // SUBFAMILY NOT NAMED
Glyma.18G238200.Wm82.a4.v1	(1 of 4) K13425 - WRKY transcription factor 22 (WRKY22)
Glyma.18G240700.Wm82.a4.v1	(1 of 2) PTHR24220//PTHR24220:SF441 - FAMILY NOT NAMED // PROTEIN TRIGALACTOSYLDIACYLGLYCEROL 3, CHLOROPLASTIC
Glyma.18G242700.Wm82.a4.v1	(1 of 7) PTHR13832//PTHR13832:SF286 - PROTEIN PHOSPHATASE 2C // PROTEIN PHOSPHATASE 2C 33-RELATED
Glyma.18G243100.Wm82.a4.v1	(1 of 4) PTHR13683//PTHR13683:SF287 - ASPARTYL PROTEASES // ASPARTIC PROTEINASE-LIKE PROTEIN 2-RELATED
Glyma.18G259000.Wm82.a4.v1	(1 of 3) PTHR10759//PTHR10759:SF1 - 60S RIBOSOMAL PROTEIN L34 // SUBFAMILY NOT NAMED
Glyma.18G265100.Wm82.a4.v1	(1 of 8) 1.1.1.22 - UDP-glucose 6-dehydrogenase
Glyma.18G267000.Wm82.a4.v1	(1 of 4) PTHR27000//PTHR27000:SF205 - FAMILY NOT NAMED // LRR RECEPTOR-LIKE SERINE/THREONINE-PROTEIN KINASE RPK2
Glyma.18G267200.Wm82.a4.v1	(1 of 8) PTHR31413//PTHR31413:SF4 - FAMILY NOT NAMED // NINJA-FAMILY PROTEIN AFP1-RELATED
Glyma.18G267600.Wm82.a4.v1	(1 of 3) K12586 - exosome complex component RRP43 (RRP43, EXOSC8, OIP2)
Glyma.18G273000.Wm82.a4.v1	(1 of 50) PF00560//PF13855 - Leucine Rich Repeat (LRR_1) // Leucine rich repeat (LRR_8)
Glyma.18G276800.Wm82.a4.v1	(1 of 6) K14207 - solute carrier family 38 (sodium-coupled neutral amino acid transporter), member 2 (SLC38A2, SNAT2)
Glyma.18G280900.Wm82.a4.v1	(1 of 6) 5.3.99.6 - Allene-oxide cyclase
Glyma.18G281600.Wm82.a4.v1	(1 of 6) K08596 - sentrin-specific protease 7 [EC:3.4.22.68] (SENP7)
Glyma.18G289100.Wm82.a4.v1	(1 of 7) PTHR19375:SF232 - MEDIATOR OF RNA POLYMERASE II TRANSCRIPTION SUBUNIT 37E-RELATED
Glyma.18G291500.Wm82.a4.v1	(1 of 1) PTHR32227//PTHR32227:SF54 - FAMILY NOT NAMED // BETA-1, 3-GLUCANASE-LIKE PROTEIN-RELATED
Glyma.18G293200.Wm82.a4.v1	(1 of 18) PTHR11206:SF87 - MATE EFFLUX FAMILY PROTEIN-RELATED
Glyma.18G296300.Wm82.a4.v1	(1 of 1) KOG2757 - Mannose-6-phosphate isomerase
Glyma.19G006700.Wm82.a4.v1	(1 of 2) PTHR31964:SF49 - ADENINE NUCLEOTIDE ALPHA HYDROLASES-LIKE SUPERFAMILY PROTEIN-RELATED
Glyma.19G018600.Wm82.a4.v1	(1 of 3) PTHR23070:SF44 - AAA-TYPE ATPASE FAMILY PROTEIN-RELATED
Glyma.19G023200.Wm82.a4.v1	(1 of 15) PTHR31089:SF4 - CYCLIC DOF FACTOR 2-RELATED
Glyma.19G025200.Wm82.a4.v1	(1 of 9) K13691 - pathogen-inducible salicylic acid glucosyltransferase [EC:2.4.1.-] Glc b1-2 SA (SGT1)
Glyma.19G036800.Wm82.a4.v1	(1 of 25) KOG1552 - Predicted alpha/beta hydrolase
Glyma.19G044900.Wm82.a4.v1	(1 of 6) 5.3.99.6 - Allene-oxide cyclase
Glyma.19G100000.Wm82.a4.v1	(1 of 36) PF02893 - GRAM domain (GRAM)
Glyma.19G112700.Wm82.a4.v1	-
Glyma.19G113400.Wm82.a4.v1	-
Glyma.19G114700.Wm82.a4.v1	-
Glyma.19G125300.Wm82.a4.v1	(1 of 74) PF05678 - VQ motif (VQ)
Glyma.19G133800.Wm82.a4.v1	(1 of 4) PTHR33790//PTHR33790:SF1 - FAMILY NOT NAMED // PROTEIN EARLY RESPONSIVE TO DEHYDRATION 15
Glyma.19G147200.Wm82.a4.v1	(1 of 3) PTHR33493//PTHR33493:SF2 - FAMILY NOT NAMED // LATE EMBRYOGENESIS ABUNDANT PROTEIN 4-5
Glyma.19G159900.Wm82.a4.v1	(1 of 2) PF00122//PF00689//PF00690//PF12710 - E1-E2 ATPase (E1-E2_ATPase) // Cation transporting ATPase, C-terminus (Cation_ATPase_C) // Cation transporter/ATPase, N-terminus (Cation_ATPase_N) // haloacid dehalogenase-like hydrolase (HAD)
Glyma.19G161000.Wm82.a4.v1	(1 of 55) K14484 - auxin-responsive protein IAA (IAA)
Glyma.19G164600.Wm82.a4.v1	(1 of 3) PTHR10641//PTHR10641:SF523 - MYB-LIKE DNA-BINDING PROTEIN MYB // SUBFAMILY NOT NAMED
Glyma.19G174200.Wm82.a4.v1	(1 of 12) PTHR26374//PTHR26374:SF198 - FAMILY NOT NAMED // ZINC FINGER PROTEIN ZAT11
Glyma.19G175400.Wm82.a4.v1	(1 of 49) PF12796//PF13962 - Ankyrin repeats (3 copies) (Ank_2) // Domain of unknown function (PGG)
Glyma.19G178100.Wm82.a4.v1	(1 of 4) K02930 - large subunit ribosomal protein L4e (RP-L4e, RPL4)
Glyma.19G181700.Wm82.a4.v1	-
Glyma.19G184100.Wm82.a4.v1	(1 of 4) PTHR22814:SF113 - HEAVY-METAL-ASSOCIATED DOMAIN-CONTAINING PROTEIN-RELATED
Glyma.19G198600.Wm82.a4.v1	(1 of 16) PTHR31415:SF4 - HARPIN-INDUCED PROTEIN-LIKE-RELATED
Glyma.19G199300.Wm82.a4.v1	(1 of 6) PTHR22849:SF38 - E3 UBIQUITIN-PROTEIN LIGASE PUB22-RELATED
Glyma.19G201400.Wm82.a4.v1	(1 of 2) PTHR24349//PTHR24349:SF125 - SERINE/THREONINE-PROTEIN KINASE // SUBFAMILY NOT NAMED
Glyma.19G202400.Wm82.a4.v1	(1 of 3) PTHR12972//PTHR12972:SF0 - DOWNSTREAM NEIGHBOR OF SON // PROTEIN DOWNSTREAM NEIGHBOR OF SON
Glyma.19G210300.Wm82.a4.v1	(1 of 2) K00949 - thiamine pyrophosphokinase (thiN, TPK1, THI80)
Glyma.19G213900.Wm82.a4.v1	(1 of 2) PTHR31875//PTHR31875:SF5 - FAMILY NOT NAMED // PROTEIN DEHYDRATION-INDUCED 19 HOMOLOG 2-RELATED
Glyma.19G228000.Wm82.a4.v1	(1 of 4) PTHR33124:SF7 - TRANSCRIPTION FACTOR BHLH149
Glyma.19G233900.Wm82.a4.v1	(1 of 4) PTHR11972:SF57 - RESPIRATORY BURST OXIDASE HOMOLOG PROTEIN B
Glyma.19G236800.Wm82.a4.v1	(1 of 17) K10664 - E3 ubiquitin-protein ligase ATL6/9/15/31/42/55 [EC:6.3.2.19] (ATL6S)
Glyma.19G244500.Wm82.a4.v1	-
Glyma.19G247000.Wm82.a4.v1	(1 of 5) PTHR11183//PTHR11183:SF39 - GLYCOGENIN // PROTEIN GYG-1, ISOFORM A
Glyma.19G247200.Wm82.a4.v1	(1 of 3) PTHR17204//PTHR17204:SF30 - PRE-MRNA PROCESSING PROTEIN PRP39-RELATED // SUBFAMILY NOT NAMED
Glyma.19G250900.Wm82.a4.v1	-
Glyma.19G252300.Wm82.a4.v1	-
Glyma.19G260700.Wm82.a4.v1	(1 of 7) 2.1.1.68 - Caffeate O-methyltransferase
Glyma.20G006500.Wm82.a4.v1	(1 of 2) KOG2992 - Nucleolar GTPase/ATPase p130
Glyma.20G010400.Wm82.a4.v1	(1 of 4) PTHR22951//PTHR22951:SF19 - CLATHRIN ASSEMBLY PROTEIN // SUBFAMILY NOT NAMED
Glyma.20G012600.Wm82.a4.v1	(1 of 4) PTHR21736:SF15 - PROTEIN OBERON 3
Glyma.20G026300.Wm82.a4.v1	(1 of 2) PTHR10353//PTHR10353:SF26 - GLYCOSYL HYDROLASE // BETA-GLUCOSIDASE 40
Glyma.20G036100.Wm82.a4.v1	(1 of 7) PTHR11240:SF19 - F7A19.32 PROTEIN-RELATED
Glyma.20G066100.Wm82.a4.v1	(1 of 2) PTHR10857//PTHR10857:SF38 - COPINE // SUBFAMILY NOT NAMED
Glyma.20G078100.Wm82.a4.v1	(1 of 49) KOG0472//KOG1187 - Leucine-rich repeat protein // Serine/threonine protein kinase
Glyma.20G094500.Wm82.a4.v1	(1 of 6) 2.4.1.123 - Inositol 3-alpha-galactosyltransferase / UDP-alpha-D-galactose:myo-inositol 3-alpha-D-galactosyltransferase
Glyma.20G096100.Wm82.a4.v1	(1 of 4) PTHR33124:SF7 - TRANSCRIPTION FACTOR BHLH149
Glyma.20G098451.Wm82.a4.v1	(1 of 74) PF00582 - Universal stress protein family (Usp)
Glyma.20G099900.Wm82.a4.v1	(1 of 12) PF04842 - Plant protein of unknown function (DUF639) (DUF639)
Glyma.20G102600.Wm82.a4.v1	(1 of 2) PTHR12265:SF0 - TRANSMEMBRANE PROTEIN 53
Glyma.20G107600.Wm82.a4.v1	(1 of 3) KOG1760 - Molecular chaperone Prefoldin, subunit 4
Glyma.20G111800.Wm82.a4.v1	(1 of 12) PTHR24078:SF279 - DUPLICATED SANT DNA-BINDING DOMAIN-CONTAINING PROTEIN
Glyma.20G116700.Wm82.a4.v1	-
Glyma.20G117400.Wm82.a4.v1	(1 of 13) PF07797 - Protein of unknown function (DUF1639) (DUF1639)
Glyma.20G119900.Wm82.a4.v1	-
Glyma.20G125100.Wm82.a4.v1	(1 of 2) K17815 - exonuclease V [EC:3.1.-.-] (EXO5)
Glyma.20G125500.Wm82.a4.v1	-
Glyma.20G127300.Wm82.a4.v1	(1 of 3) PTHR27000//PTHR27000:SF170 - FAMILY NOT NAMED // LEUCINE-RICH REPEAT-CONTAINING PROTEIN
Glyma.20G131500.Wm82.a4.v1	(1 of 4) PTHR13832//PTHR13832:SF362 - PROTEIN PHOSPHATASE 2C // PROTEIN PHOSPHATASE 2C 63-RELATED
Glyma.20G131700.Wm82.a4.v1	(1 of 11) PF03242 - Late embryogenesis abundant protein (LEA_3)
Glyma.20G134000.Wm82.a4.v1	-
Glyma.20G141800.Wm82.a4.v1	(1 of 10) PTHR31062:SF1 - XYLOGLUCAN ENDOTRANSGLUCOSYLASE/HYDROLASE PROTEIN 8-RELATED
Glyma.20G155100.Wm82.a4.v1	(1 of 4) PTHR31839//PTHR31839:SF8 - FAMILY NOT NAMED // DEHYDRATION-RESPONSIVE ELEMENT-BINDING PROTEIN 1A-RELATED
Glyma.20G162600.Wm82.a4.v1	(1 of 2) PTHR31899:SF1 - BETA-CAROTENE 3-HYDROXYLASE 1, CHLOROPLASTIC-RELATED
Glyma.20G168500.Wm82.a4.v1	(1 of 349) PF00847 - AP2 domain (AP2)
Glyma.20G170300.Wm82.a4.v1	(1 of 3) PTHR22603:SF39 - CHOLINE KINASE 1-RELATED
Glyma.20G178300.Wm82.a4.v1	-
Glyma.20G179600.Wm82.a4.v1	(1 of 2) PTHR32241:SF3 - PATATIN-LIKE PROTEIN 6-RELATED
Glyma.20G180000.Wm82.a4.v1	(1 of 20) PF02362//PF06507 - B3 DNA binding domain (B3) // Auxin response factor (Auxin_resp)
Glyma.20G198000.Wm82.a4.v1	(1 of 3) K17108 - non-lysosomal glucosylceramidase (GBA2)
Glyma.20G211700.Wm82.a4.v1	(1 of 34) PTHR23050 - CALCIUM BINDING PROTEIN
Glyma.20G213700.Wm82.a4.v1	(1 of 13) 2.1.1.150 - Isoflavone 7-O-methyltransferase
Glyma.20G218100.Wm82.a4.v1	(1 of 4) K13679 - granule-bound starch synthase [EC:2.4.1.242] Glc a1-4 Glc (WAXY)
Glyma.20G218902.Wm82.a4.v1	(1 of 4) PTHR13683//PTHR13683:SF287 - ASPARTYL PROTEASES // ASPARTIC PROTEINASE-LIKE PROTEIN 2-RELATED
Glyma.20G228500.Wm82.a4.v1	(1 of 6) PTHR31662//PTHR31662:SF6 - FAMILY NOT NAMED // DNA-BINDING STOREKEEPER PROTEIN-RELATED TRANSCRIPTIONAL REGULATOR
Glyma.20G236900.Wm82.a4.v1	(1 of 4) KOG4431 - Uncharacterized protein, induced by hypoxia
Glyma.20G241200.Wm82.a4.v1	(1 of 1) KOG0508//KOG0512//KOG4412 - Ankyrin repeat protein // Fetal globin-inducing factor (contains ankyrin repeats) // 26S proteasome regulatory complex, subunit PSMD10
Glyma.20G241800.Wm82.a4.v1	(1 of 154) K00430 - peroxidase (E1.11.1.7)
Glyma.20G243600.Wm82.a4.v1	(1 of 112) PF13839//PF14416 - GDSL/SGNH-like Acyl-Esterase family found in Pmr5 and Cas1p (PC-Esterase) // PMR5 N terminal Domain (PMR5N)
Glyma.U031524.Wm82.a4.v1	(1 of 9) PTHR11926//PTHR11926:SF136 - GLUCOSYL/GLUCURONOSYL TRANSFERASES // SUBFAMILY NOT NAMED
Glyma.U035800.Wm82.a4.v1	(1 of 4) PTHR13935//PTHR13935:SF59 - ACHAETE-SCUTE TRANSCRIPTION FACTOR-RELATED // SUBFAMILY NOT NAMED
Glyma.16G025200.Wm82.a4.v1	(1 of 2) 2.4.1.131 - GDP-Man:Man(3)GlcNAc(2)-PP-dolichol alpha-1,2-mannosyltransferase	pink	0	-0.886
Glyma.09G175050.Wm82.a4.v1	(1 of 2) PF17042 - Putative nucleotide-binding of sugar-metabolising enzyme (DUF1357_C)
Glyma.02G027500.Wm82.a4.v1	(1 of 2) PTHR12197:SF166 - ZINC ION BINDING PROTEIN
Glyma.09G006300.Wm82.a4.v1	(1 of 4) PTHR10146 - PROLINE SYNTHETASE CO-TRANSCRIBED BACTERIAL HOMOLOG PROTEIN
Glyma.07G064400.Wm82.a4.v1	(1 of 19) PTHR33103//PTHR33103:SF4 - FAMILY NOT NAMED // EMB|CAB69840.1
Glyma.15G098500.Wm82.a4.v1	(1 of 6) PTHR20863//PTHR20863:SF29 - ACYL CARRIER PROTEIN/ZINC FINGER PROTEIN 593-RELATED // ACYL CARRIER PROTEIN 1, CHLOROPLASTIC-RELATED
Glyma.09G186300.Wm82.a4.v1	(1 of 399) PF00067 - Cytochrome P450 (p450)
Glyma.17G178001.Wm82.a4.v1	(1 of 4) PF14693 - Ribosomal protein TL5, C-terminal domain (Ribosomal_TL5_C)
Glyma.02G205102.Wm82.a4.v1	(1 of 6) PTHR21659 - HYDROPHOBIC PROTEIN RCI2 LOW TEMPERATURE AND SALT RESPONSIVE PROTEIN LTI6 -RELATED
Glyma.13G251300.Wm82.a4.v1	(1 of 7) PTHR23042//PTHR23042:SF67 - CIRCADIAN PROTEIN CLOCK/ARNT/BMAL/PAS // TRANSCRIPTION FACTOR ILR3-RELATED
Glyma.08G158200.Wm82.a4.v1	-
Glyma.15G053700.Wm82.a4.v1	(1 of 6) PTHR13832:SF314 - PROTEIN PHOSPHATASE 2C 10-RELATED
Glyma.06G069000.Wm82.a4.v1	(1 of 4) PTHR10783//PTHR10783:SF47 - XENOTROPIC AND POLYTROPIC RETROVIRUS RECEPTOR 1-RELATED // SUBFAMILY NOT NAMED
Glyma.20G041000.Wm82.a4.v1	(1 of 7) 3.1.1.4 - Phospholipase A(2) / Phospholipase A2
Glyma.07G065000.Wm82.a4.v1	(1 of 12) PTHR23155//PTHR23155:SF590 - LEUCINE-RICH REPEAT-CONTAINING PROTEIN // SUBFAMILY NOT NAMED
Glyma.12G011200.Wm82.a4.v1	(1 of 9) K00006 - glycerol-3-phosphate dehydrogenase (NAD+) (GPD1)
Glyma.01G049800.Wm82.a4.v1	-
Glyma.02G018100.Wm82.a4.v1	-
Glyma.02G084400.Wm82.a4.v1	(1 of 2) PTHR10209//PTHR10209:SF148 - OXIDOREDUCTASE, 2OG-FE II OXYGENASE FAMILY PROTEIN // SUBFAMILY NOT NAMED
Glyma.02G302800.Wm82.a4.v1	(1 of 26) K10406 - kinesin family member C2/C3 (KIFC2_3)
Glyma.03G043600.Wm82.a4.v1	(1 of 36) PTHR23155//PTHR23155:SF562 - LEUCINE-RICH REPEAT-CONTAINING PROTEIN // SUBFAMILY NOT NAMED
Glyma.03G048000.Wm82.a4.v1	-
Glyma.03G048800.Wm82.a4.v1	(1 of 49) PTHR11017//PTHR11017:SF163 - LEUCINE-RICH REPEAT-CONTAINING PROTEIN // SUBFAMILY NOT NAMED
Glyma.03G054100.Wm82.a4.v1	(1 of 49) PTHR11017//PTHR11017:SF163 - LEUCINE-RICH REPEAT-CONTAINING PROTEIN // SUBFAMILY NOT NAMED
Glyma.03G088000.Wm82.a4.v1	(1 of 49) PTHR11017//PTHR11017:SF163 - LEUCINE-RICH REPEAT-CONTAINING PROTEIN // SUBFAMILY NOT NAMED
Glyma.04G104700.Wm82.a4.v1	(1 of 3) PTHR22753//PTHR22753:SF1 - FAMILY NOT NAMED // TRANSMEMBRANE PROTEIN 68
Glyma.04G188200.Wm82.a4.v1	(1 of 6) PTHR23257//PTHR23257:SF473 - SERINE-THREONINE PROTEIN KINASE // SUBFAMILY NOT NAMED
Glyma.04G201500.Wm82.a4.v1	(1 of 7) PTHR10857//PTHR10857:SF26 - COPINE // PROTEIN BONZAI 3
Glyma.05G191267.Wm82.a4.v1	(1 of 4) PTHR31989:SF14 - NAC DOMAIN CONTAINING PROTEIN 103
Glyma.06G002800.Wm82.a4.v1	(1 of 2) PTHR31742:SF1 - RPA-INTERACTING PROTEIN
Glyma.06G268600.Wm82.a4.v1	(1 of 8) PF05729//PF13676 - NACHT domain (NACHT) // TIR domain (TIR_2)
Glyma.06G283200.Wm82.a4.v1	(1 of 6) 1.1.1.86 - Ketol-acid reductoisomerase (NADP(+)) / Dihydroxyisovalerate dehydrogenase (isomerizing)
Glyma.07G063100.Wm82.a4.v1	-
Glyma.07G094000.Wm82.a4.v1	-
Glyma.07G095800.Wm82.a4.v1	(1 of 22) K04730 - interleukin-1 receptor-associated kinase 1 (IRAK1)
Glyma.07G211300.Wm82.a4.v1	(1 of 2) PTHR10265//PTHR10265:SF22 - CYCLIN-DEPENDENT KINASE INHIBITOR 1 // CYCLIN-DEPENDENT KINASE INHIBITOR 7
Glyma.09G018900.Wm82.a4.v1	(1 of 7) PTHR27003:SF15 - LEUCINE-RICH REPEAT PROTEIN KINASE-LIKE PROTEIN
Glyma.09G107600.Wm82.a4.v1	(1 of 8) PF04928 - Poly(A) polymerase central domain (PAP_central)
Glyma.09G115600.Wm82.a4.v1	(1 of 3) PTHR18934//PTHR18934:SF146 - ATP-DEPENDENT RNA HELICASE // DEA(D/H)-BOX RNA HELICASE FAMILY PROTEIN
Glyma.09G159551.Wm82.a4.v1	-
Glyma.09G246500.Wm82.a4.v1	(1 of 2) PTHR12709//PTHR12709:SF5 - DNA-DIRECTED RNA POLYMERASE II, III // DNA-DIRECTED RNA POLYMERASE I SUBUNIT RPA43
Glyma.11G174700.Wm82.a4.v1	(1 of 59) PTHR23273//PTHR23273:SF8 - REPLICATION FACTOR A 1, RFA1 // SUBFAMILY NOT NAMED
Glyma.12G016051.Wm82.a4.v1	(1 of 2) PTHR12181//PTHR12181:SF35 - LIPIN // SUBFAMILY NOT NAMED
Glyma.13G001500.Wm82.a4.v1	(1 of 4) PTHR31645//PTHR31645:SF11 - FAMILY NOT NAMED // METAL-NICOTIANAMINE TRANSPORTER YSL1
Glyma.13G003000.Wm82.a4.v1	(1 of 1) PTHR11005//PTHR11005:SF41//PTHR11005:SF6 - LYSOSOMAL ACID LIPASE-RELATED // SUBFAMILY NOT NAMED // LIPASE
Glyma.13G216400.Wm82.a4.v1	(1 of 6) PTHR23244//PTHR23244:SF308 - KELCH REPEAT DOMAIN // KELCH REPEAT-CONTAINING PROTEIN
Glyma.13G342500.Wm82.a4.v1	(1 of 2) PTHR33305:SF9 - ETHYLENE INSENSITIVE 3-LIKE 3 PROTEIN
Glyma.14G155300.Wm82.a4.v1	-
Glyma.14G207400.Wm82.a4.v1	(1 of 11) KOG2966 - Uncharacterized conserved protein
Glyma.15G091200.Wm82.a4.v1	(1 of 2) PTHR35720:SF1 - PLASTID TRANSCRIPTIONALLY ACTIVE 12
Glyma.15G147100.Wm82.a4.v1	(1 of 11) PTHR12341 - 5'->3' EXORIBONUCLEASE
Glyma.15G246100.Wm82.a4.v1	(1 of 9) PTHR23155//PTHR23155:SF646 - LEUCINE-RICH REPEAT-CONTAINING PROTEIN // SUBFAMILY NOT NAMED
Glyma.15G257300.Wm82.a4.v1	(1 of 3) PTHR10209//PTHR10209:SF122 - OXIDOREDUCTASE, 2OG-FE II OXYGENASE FAMILY PROTEIN // 1-AMINOCYCLOPROPANE-1-CARBOXYLATE OXIDASE HOMOLOG 10-RELATED
Glyma.15G257800.Wm82.a4.v1	(1 of 6) PTHR11850//PTHR11850:SF101 - HOMEOBOX PROTEIN TRANSCRIPTION FACTORS // SUBFAMILY NOT NAMED
Glyma.16G031600.Wm82.a4.v1	(1 of 12) PTHR23155//PTHR23155:SF590 - LEUCINE-RICH REPEAT-CONTAINING PROTEIN // SUBFAMILY NOT NAMED
Glyma.16G031700.Wm82.a4.v1	(1 of 12) PTHR23155//PTHR23155:SF590 - LEUCINE-RICH REPEAT-CONTAINING PROTEIN // SUBFAMILY NOT NAMED
Glyma.16G065000.Wm82.a4.v1	(1 of 78) PF00069//PF08263//PF13855 - Protein kinase domain (Pkinase) // Leucine rich repeat N-terminal domain (LRRNT_2) // Leucine rich repeat (LRR_8)
Glyma.16G111100.Wm82.a4.v1	(1 of 3) PTHR24185//PTHR24185:SF1 - FAMILY NOT NAMED // CALCIUM-INDEPENDENT PHOSPHOLIPASE A2-GAMMA
Glyma.16G204400.Wm82.a4.v1	(1 of 4) PTHR31500//PTHR31500:SF18 - FAMILY NOT NAMED // AT HOOK MOTIF DNA-BINDING FAMILY PROTEIN-RELATED
Glyma.16G211200.Wm82.a4.v1	-
Glyma.16G211400.Wm82.a4.v1	(1 of 1) PF00004//PF01582//PF13676 - ATPase family associated with various cellular activities (AAA) (AAA) // TIR domain (TIR) // TIR domain (TIR_2)
Glyma.17G086900.Wm82.a4.v1	(1 of 5) PTHR14281//PTHR14281:SF0 - FAMILY NOT NAMED // KINETOCHORE PROTEIN SPC25
Glyma.17G172800.Wm82.a4.v1	(1 of 6) PTHR12154 - GLYCOSYL TRANSFERASE-RELATED
Glyma.17G220100.Wm82.a4.v1	(1 of 13) PF01535//PF12854//PF13041//PF14432 - PPR repeat (PPR) // PPR repeat (PPR_1) // PPR repeat family (PPR_2) // DYW family of nucleic acid deaminases (DYW_deaminase)
Glyma.18G226500.Wm82.a4.v1	(1 of 12) PTHR23155//PTHR23155:SF590 - LEUCINE-RICH REPEAT-CONTAINING PROTEIN // SUBFAMILY NOT NAMED
Glyma.18G254100.Wm82.a4.v1	(1 of 3) PTHR23070:SF44 - AAA-TYPE ATPASE FAMILY PROTEIN-RELATED
Glyma.18G269800.Wm82.a4.v1	-
Glyma.18G272700.Wm82.a4.v1	(1 of 2227) 2.7.11.1 - Non-specific serine/threonine protein kinase / Threonine-specific protein kinase
Glyma.U024802.Wm82.a4.v1	(1 of 2227) 2.7.11.1 - Non-specific serine/threonine protein kinase / Threonine-specific protein kinase
Glyma.03G043020.Wm82.a4.v1	(1 of 11) PTHR13832:SF199 - PROTEIN PHOSPHATASE 2C 65-RELATED
Glyma.03G044175.Wm82.a4.v1	(1 of 11) PTHR13832:SF199 - PROTEIN PHOSPHATASE 2C 65-RELATED
Glyma.03G045400.Wm82.a4.v1	(1 of 6) PTHR10108//PTHR10108:SF885 - METHYLTRANSFERASE // SUBFAMILY NOT NAMED
Glyma.03G088100.Wm82.a4.v1	(1 of 2) PF00931//PF01582//PF13676 - NB-ARC domain (NB-ARC) // TIR domain (TIR) // TIR domain (TIR_2)
Glyma.03G088151.Wm82.a4.v1	(1 of 8) PTHR24056:SF107 - CYCLIN-DEPENDENT KINASE 11A-RELATED
Glyma.04G084702.Wm82.a4.v1	-
Glyma.04G231351.Wm82.a4.v1	-
Glyma.05G211900.Wm82.a4.v1	(1 of 176) PF03106 - WRKY DNA -binding domain (WRKY)
Glyma.06G037300.Wm82.a4.v1	(1 of 2) 4.2.1.75 - Uroporphyrinogen-III synthase / Uroporphyrinogen-III cosynthetase
Glyma.06G268700.Wm82.a4.v1	(1 of 3) PF00931//PF13676//PF13855 - NB-ARC domain (NB-ARC) // TIR domain (TIR_2) // Leucine rich repeat (LRR_8)
Glyma.07G019200.Wm82.a4.v1	(1 of 2) K02200 - cytochrome c-type biogenesis protein CcmH (ccmH)
Glyma.07G065400.Wm82.a4.v1	(1 of 19) PTHR33103//PTHR33103:SF4 - FAMILY NOT NAMED // EMB|CAB69840.1
Glyma.07G066700.Wm82.a4.v1	(1 of 2) K18586 - ubiquinone biosynthesis protein COQ4 (COQ4)
Glyma.07G142200.Wm82.a4.v1	-
Glyma.07G184500.Wm82.a4.v1	(1 of 7) PTHR23029//PTHR23029:SF40 - PHOSPHOGLYCERATE MUTASE // PHOSPHOGLYCERATE MUTASE-LIKE PROTEIN
Glyma.09G016600.Wm82.a4.v1	(1 of 12) 2.4.1.82 - Galactinol--sucrose galactosyltransferase / Raffinose synthase
Glyma.09G284300.Wm82.a4.v1	(1 of 7) PTHR31072//PTHR31072:SF7 - FAMILY NOT NAMED // TRANSCRIPTION FACTOR TCP21-RELATED
Glyma.13G087200.Wm82.a4.v1	(1 of 5) K17470 - sulfate transporter 1, high-affinity (SULTR1)
Glyma.14G048200.Wm82.a4.v1	(1 of 7) PTHR10795//PTHR10795:SF365 - PROPROTEIN CONVERTASE SUBTILISIN/KEXIN // SUBFAMILY NOT NAMED
Glyma.15G057900.Wm82.a4.v1	(1 of 8) PTHR11945//PTHR11945:SF179 - MADS BOX PROTEIN // MADS-BOX PROTEIN SVP
Glyma.15G058100.Wm82.a4.v1	(1 of 16) 3.4.22.68 - Ulp1 peptidase / Ulp1 protease
Glyma.15G176802.Wm82.a4.v1	(1 of 3) PTHR23176//PTHR23176:SF44 - RHO/RAC/CDC GTPASE-ACTIVATING PROTEIN // SUBFAMILY NOT NAMED
Glyma.15G240132.Wm82.a4.v1	-
Glyma.15G247400.Wm82.a4.v1	(1 of 9) PTHR23155//PTHR23155:SF646 - LEUCINE-RICH REPEAT-CONTAINING PROTEIN // SUBFAMILY NOT NAMED
Glyma.16G092900.Wm82.a4.v1	(1 of 4) PTHR12136//PTHR12136:SF47 - STEROIDOGENIC ACUTE REGULATORY PROTEIN STAR // STEROIDOGENIC ACUTE REGULATORY-LIKE PROTEIN 1
Glyma.16G098700.Wm82.a4.v1	(1 of 41) 5.3.4.1 - Protein disulfide-isomerase / S-S rearrangase
Glyma.16G213700.Wm82.a4.v1	(1 of 50) PTHR11017//PTHR11017:SF171 - LEUCINE-RICH REPEAT-CONTAINING PROTEIN // SUBFAMILY NOT NAMED
Glyma.17G219802.Wm82.a4.v1	(1 of 6) PTHR15180 - GENERAL TRANSCRIPTION FACTOR 3C POLYPEPTIDE 1
Glyma.18G034900.Wm82.a4.v1	(1 of 2) PTHR12271:SF40 - POLY(A) RNA POLYMERASE GLD2
Glyma.18G226300.Wm82.a4.v1	-
Glyma.18G269400.Wm82.a4.v1	(1 of 2227) 2.7.11.1 - Non-specific serine/threonine protein kinase / Threonine-specific protein kinase
Glyma.18G272500.Wm82.a4.v1	(1 of 63) K04733 - interleukin-1 receptor-associated kinase 4 (IRAK4)
Glyma.18G287800.Wm82.a4.v1	(1 of 3) PTHR19375:SF194 - MEDIATOR OF RNA POLYMERASE II TRANSCRIPTION SUBUNIT 37C-RELATED
Glyma.20G073400.Wm82.a4.v1	(1 of 7) PTHR11361:SF82 - DNA MISMATCH REPAIR PROTEIN MSH1, MITOCHONDRIAL
Glyma.01G002100.Wm82.a4.v1	(1 of 35) PF02309//PF02362//PF06507 - AUX/IAA family (AUX_IAA) // B3 DNA binding domain (B3) // Auxin response factor (Auxin_resp)	black	0.00155	-0.515
Glyma.12G108000.Wm82.a4.v1	(1 of 1) PF01342 - SAND domain (SAND)
Glyma.07G222500.Wm82.a4.v1	(1 of 31) PF14299 - Phloem protein 2 (PP2)
Glyma.10G092200.Wm82.a4.v1	(1 of 4) PTHR10024:SF236 - ANTHRANILATE PHOSPHORIBOSYLTRANSFERASE-LIKE PROTEIN
Glyma.12G068000.Wm82.a4.v1	(1 of 8) PTHR23012//PTHR23012:SF25 - MEMBRANE ASSOCIATED RING FINGER // RING/U-BOX DOMAIN-CONTAINING PROTEIN
Glyma.09G271800.Wm82.a4.v1	(1 of 16) PF11891 - Domain of unknown function (DUF3411) (DUF3411)
Glyma.15G165100.Wm82.a4.v1	(1 of 4) PTHR10795//PTHR10795:SF431 - PROPROTEIN CONVERTASE SUBTILISIN/KEXIN // SUBTILISIN SERINE PROTEASE-RELATED
Glyma.15G203600.Wm82.a4.v1	(1 of 24) PF00560//PF07714//PF08263//PF13855 - Leucine Rich Repeat (LRR_1) // Protein tyrosine kinase (Pkinase_Tyr) // Leucine rich repeat N-terminal domain (LRRNT_2) // Leucine rich repeat (LRR_8)
Glyma.14G098700.Wm82.a4.v1	-
Glyma.08G283600.Wm82.a4.v1	(1 of 24) PF03080//PF14365 - Domain of unknown function (DUF239) (DUF239) // Domain of unknown function (DUF4409) (DUF4409)
Glyma.01G071700.Wm82.a4.v1	(1 of 3) PTHR27001//PTHR27001:SF226 - FAMILY NOT NAMED // PROTEIN NSP-INTERACTING KINASE 2
Glyma.02G149900.Wm82.a4.v1	(1 of 4) PTHR31447:SF2 - OXIDOREDUCTASE, 2OG-FE(II) OXYGENASE FAMILY PROTEIN
Glyma.02G211000.Wm82.a4.v1	(1 of 3) PTHR31376//PTHR31376:SF1 - FAMILY NOT NAMED // PURINE PERMEASE 1-RELATED
Glyma.02G253900.Wm82.a4.v1	(1 of 56) 3.1.3.2 - Acid phosphatase / Phosphomonoesterase
Glyma.02G291500.Wm82.a4.v1	(1 of 4) PTHR10388//PTHR10388:SF16 - EUKARYOTIC TRANSLATION INITIATION FACTOR SUI1 // SUBFAMILY NOT NAMED
Glyma.03G141600.Wm82.a4.v1	(1 of 3) PTHR27008:SF41 - LEUCINE-RICH REPEAT PROTEIN KINASE-LIKE PROTEIN
Glyma.03G260200.Wm82.a4.v1	(1 of 3) PTHR24343//PTHR24343:SF199 - SERINE/THREONINE KINASE // SUBFAMILY NOT NAMED
Glyma.04G007800.Wm82.a4.v1	(1 of 7) K14016 - ubiquitin fusion degradation protein 1 (UFD1)
Glyma.04G075100.Wm82.a4.v1	(1 of 1) PTHR24093//PTHR24093:SF355//PTHR24093:SF361 - FAMILY NOT NAMED // ATPASE 1, PLASMA MEMBRANE-TYPE-RELATED // SUBFAMILY NOT NAMED
Glyma.04G245900.Wm82.a4.v1	(1 of 2) PTHR10209//PTHR10209:SF189 - OXIDOREDUCTASE, 2OG-FE II OXYGENASE FAMILY PROTEIN // 1-AMINOCYCLOPROPANE-1-CARBOXYLATE OXIDASE 5
Glyma.05G012200.Wm82.a4.v1	(1 of 2) PTHR10257//PTHR10257:SF13 - SERINE/THREONINE PROTEIN PHOSPHATASE 2A PP2A REGULATORY SUBUNIT B // SUBFAMILY NOT NAMED
Glyma.05G218700.Wm82.a4.v1	(1 of 5) K19039 - E3 ubiquitin-protein ligase ATL7/58/59 [EC:6.3.2.19] (ATL7_58_59)
Glyma.05G219900.Wm82.a4.v1	(1 of 9) PTHR24320//PTHR24320:SF81 - FAMILY NOT NAMED // NAD(P)-BINDING ROSSMANN-FOLD SUPERFAMILY PROTEIN
Glyma.06G087200.Wm82.a4.v1	(1 of 33) PF10604 - Polyketide cyclase / dehydrase and lipid transport (Polyketide_cyc2)
Glyma.07G035800.Wm82.a4.v1	(1 of 87) PF13962 - Domain of unknown function (PGG)
Glyma.07G139100.Wm82.a4.v1	(1 of 5) PTHR11654:SF79 - PROTEIN NRT1/ PTR FAMILY 5.5-RELATED
Glyma.07G229800.Wm82.a4.v1	(1 of 4) PTHR31499:SF11 - HOMEODOMAIN-LIKE SUPERFAMILY PROTEIN
Glyma.07G267800.Wm82.a4.v1	(1 of 2) PTHR22601//PTHR22601:SF2 - ISP4 LIKE PROTEIN // OLIGOPEPTIDE TRANSPORTER 3
Glyma.09G037600.Wm82.a4.v1	-
Glyma.09G041700.Wm82.a4.v1	-
Glyma.09G119500.Wm82.a4.v1	(1 of 11) PTHR22814//PTHR22814:SF47 - COPPER TRANSPORT PROTEIN ATOX1-RELATED // SUBFAMILY NOT NAMED
Glyma.09G240900.Wm82.a4.v1	(1 of 1) PF00085//PF14595 - Thioredoxin (Thioredoxin) // Thioredoxin (Thioredoxin_9)
Glyma.11G122000.Wm82.a4.v1	(1 of 3) PTHR13871//PTHR13871:SF51 - THIOREDOXIN // CYSTEINE/HISTIDINE-RICH C1 DOMAIN FAMILY PROTEIN
Glyma.12G043400.Wm82.a4.v1	(1 of 2) PTHR10996//PTHR10996:SF162 - 2-HYDROXYACID DEHYDROGENASE-RELATED // SUBFAMILY NOT NAMED
Glyma.12G095200.Wm82.a4.v1	(1 of 4) PTHR33155//PTHR33155:SF3 - FAMILY NOT NAMED // PROTEIN FAF-LIKE, CHLOROPLASTIC-RELATED
Glyma.13G126200.Wm82.a4.v1	(1 of 35) PF14379 - MYB-CC type transfactor, LHEQLE motif (Myb_CC_LHEQLE)
Glyma.13G159400.Wm82.a4.v1	(1 of 2227) 2.7.11.1 - Non-specific serine/threonine protein kinase / Threonine-specific protein kinase
Glyma.13G174300.Wm82.a4.v1	(1 of 4) PTHR13301//PTHR13301:SF41 - X-BOX TRANSCRIPTION FACTOR-RELATED // SUBFAMILY NOT NAMED
Glyma.13G209101.Wm82.a4.v1	(1 of 5) PTHR11088//PTHR11088:SF34 - TRNA DELTA 2 -ISOPENTENYLPYROPHOSPHATE TRANSFERASE-RELATED // SUBFAMILY NOT NAMED
Glyma.14G012600.Wm82.a4.v1	(1 of 10) PTHR23324//PTHR23324:SF79 - SEC14 RELATED PROTEIN // SUBFAMILY NOT NAMED
Glyma.14G053000.Wm82.a4.v1	-
Glyma.14G059400.Wm82.a4.v1	(1 of 12) K05857 - phosphatidylinositol phospholipase C, delta (PLCD)
Glyma.14G082400.Wm82.a4.v1	(1 of 21) 3.1.4.11 - Phosphoinositide phospholipase C / Triphosphoinositide phosphodiesterase
Glyma.15G019500.Wm82.a4.v1	(1 of 7) PTHR28242//PTHR28242:SF4 - FAMILY NOT NAMED // HISTIDINE-CONTAINING PHOSPHOTRANSFER PROTEIN 4
Glyma.15G046400.Wm82.a4.v1	(1 of 4) PTHR23086//PTHR23086:SF25 - PHOSPHATIDYLINOSITOL-4-PHOSPHATE 5-KINASE // PHOSPHATIDYLINOSITOL 4-PHOSPHATE 5-KINASE 7-RELATED
Glyma.15G054100.Wm82.a4.v1	(1 of 13) KOG1546 - Metacaspase involved in regulation of apoptosis
Glyma.15G117900.Wm82.a4.v1	-
Glyma.15G141600.Wm82.a4.v1	-
Glyma.15G215000.Wm82.a4.v1	(1 of 3) PTHR31499:SF2 - MYB FAMILY TRANSCRIPTION FACTOR APL
Glyma.16G053800.Wm82.a4.v1	(1 of 2) PTHR31096:SF22 - ACR6
Glyma.16G125100.Wm82.a4.v1	(1 of 4) PTHR24423//PTHR24423:SF436 - TWO-COMPONENT SENSOR HISTIDINE KINASE // HISTIDINE KINASE 1
Glyma.16G144000.Wm82.a4.v1	(1 of 4) PTHR27005//PTHR27005:SF34 - FAMILY NOT NAMED // WALL-ASSOCIATED RECEPTOR KINASE-LIKE 14-RELATED
Glyma.17G084600.Wm82.a4.v1	-
Glyma.17G152800.Wm82.a4.v1	(1 of 4) PTHR31312//PTHR31312:SF2 - FAMILY NOT NAMED // TWO-COMPONENT RESPONSE REGULATOR-LIKE APRR2
Glyma.19G152900.Wm82.a4.v1	(1 of 4) PTHR31447:SF2 - OXIDOREDUCTASE, 2OG-FE(II) OXYGENASE FAMILY PROTEIN
Glyma.20G215000.Wm82.a4.v1	(1 of 5) K03264 - translation initiation factor 6 (EIF6)
Glyma.01G127200.Wm82.a4.v1	(1 of 13) PTHR21495//PTHR21495:SF77 - NUCLEOPORIN-RELATED // DIRIGENT PROTEIN 19
Glyma.01G186100.Wm82.a4.v1	-
Glyma.02G019400.Wm82.a4.v1	(1 of 2) K15275 - solute carrier family 35 (UDP-galactose transporter), member B1 (SLC35B1)
Glyma.02G022300.Wm82.a4.v1	(1 of 58) KOG0483 - Transcription factor HEX, contains HOX and HALZ domains
Glyma.02G024900.Wm82.a4.v1	(1 of 4) 4.2.1.109 - Methylthioribulose 1-phosphate dehydratase / 1-PMT-ribulose dehydratase
Glyma.02G025700.Wm82.a4.v1	(1 of 2) PTHR34277//PTHR34277:SF2 - FAMILY NOT NAMED // CLAVATA3/ESR (CLE)-RELATED PROTEIN 26
Glyma.02G075100.Wm82.a4.v1	(1 of 11) K15378 - solute carrier family 45, member 1/2/4 (SLC45A1_2_4)
Glyma.02G242400.Wm82.a4.v1	-
Glyma.03G034000.Wm82.a4.v1	(1 of 4) PTHR12565//PTHR12565:SF173 - STEROL REGULATORY ELEMENT-BINDING PROTEIN // TRANSCRIPTION FACTOR UNE10
Glyma.03G141700.Wm82.a4.v1	(1 of 4) PTHR16223:SF29 - TRANSCRIPTION FACTOR BHLH117-RELATED
Glyma.03G149900.Wm82.a4.v1	(1 of 4) PTHR31447:SF2 - OXIDOREDUCTASE, 2OG-FE(II) OXYGENASE FAMILY PROTEIN
Glyma.03G236200.Wm82.a4.v1	(1 of 2) PTHR22814//PTHR22814:SF96 - COPPER TRANSPORT PROTEIN ATOX1-RELATED // SUBFAMILY NOT NAMED
Glyma.04G022300.Wm82.a4.v1	(1 of 6) PTHR10795//PTHR10795:SF328 - PROPROTEIN CONVERTASE SUBTILISIN/KEXIN // SUBFAMILY NOT NAMED
Glyma.04G151600.Wm82.a4.v1	(1 of 4) PTHR31727:SF2 - PALMITOYL-ACYL CARRIER PROTEIN THIOESTERASE, CHLOROPLASTIC
Glyma.05G042600.Wm82.a4.v1	(1 of 6) 1.14.13.120 - Costunolide synthase
Glyma.05G044000.Wm82.a4.v1	(1 of 4) PTHR31683//PTHR31683:SF28 - FAMILY NOT NAMED // PECTATE LYASE 22-RELATED
Glyma.05G128500.Wm82.a4.v1	-
Glyma.05G191333.Wm82.a4.v1	-
Glyma.05G215600.Wm82.a4.v1	(1 of 2) PTHR22950//PTHR22950:SF229 - AMINO ACID TRANSPORTER // GABA TRANSPORTER 2-RELATED
Glyma.06G106200.Wm82.a4.v1	(1 of 8) K17469 - sulfate transporter 2, low-affinity (SULTR2)
Glyma.06G166800.Wm82.a4.v1	(1 of 10) PTHR10791:SF22 - BIDIRECTIONAL SUGAR TRANSPORTER SWEET10
Glyma.06G207800.Wm82.a4.v1	-
Glyma.06G213400.Wm82.a4.v1	(1 of 4) PTHR31003//PTHR31003:SF3 - MYB FAMILY TRANSCRIPTION FACTOR // SUBFAMILY NOT NAMED
Glyma.07G139400.Wm82.a4.v1	(1 of 100) PF14368 - Probable lipid transfer (LTP_2)
Glyma.07G271900.Wm82.a4.v1	(1 of 2) PTHR31948//PTHR31948:SF19 - FAMILY NOT NAMED // ZINC-FINGER HOMEODOMAIN PROTEIN 3-RELATED
Glyma.08G098400.Wm82.a4.v1	(1 of 13) K08150 - MFS transporter, SP family, solute carrier family 2 (myo-inositol transporter), member 13 (SLC2A13, ITR)
Glyma.08G194500.Wm82.a4.v1	(1 of 4) PTHR27001//PTHR27001:SF152 - FAMILY NOT NAMED // GENOMIC DNA, CHROMOSOME 3, P1 CLONE:MMM17-RELATED
Glyma.08G217400.Wm82.a4.v1	(1 of 6) PTHR19139//PTHR19139:SF170 - AQUAPORIN TRANSPORTER // AQUAPORIN NIP6-1
Glyma.08G298400.Wm82.a4.v1	(1 of 5) PTHR24326:SF176 - HOMEOBOX-LEUCINE ZIPPER PROTEIN ATHB-13-RELATED
Glyma.09G019602.Wm82.a4.v1	(1 of 2) PTHR21535//PTHR21535:SF49 - MAGNESIUM AND COBALT TRANSPORT PROTEIN/MITOCHONDRIAL IMPORT INNER MEMBRANE TRANSLOCASE SUBUNIT TIM8 // MAGNESIUM TRANSPORTER CORA-LIKE FAMILY PROTEIN
Glyma.09G041500.Wm82.a4.v1	(1 of 70) K09286 - EREBP-like factor (EREBP)
Glyma.09G056300.Wm82.a4.v1	(1 of 22) K01535 - H+-transporting ATPase (E3.6.3.6)
Glyma.10G023900.Wm82.a4.v1	(1 of 4) PTHR31447:SF2 - OXIDOREDUCTASE, 2OG-FE(II) OXYGENASE FAMILY PROTEIN
Glyma.10G144300.Wm82.a4.v1	(1 of 5) PTHR11964:SF16 - S-ADENOSYLMETHIONINE SYNTHASE 4
Glyma.10G158900.Wm82.a4.v1	-
Glyma.10G189700.Wm82.a4.v1	-
Glyma.11G155000.Wm82.a4.v1	-
Glyma.11G192900.Wm82.a4.v1	(1 of 2) PTHR21319//PTHR21319:SF14 - RING FINGER AND CHY ZINC FINGER DOMAIN-CONTAINING PROTEIN 1 // SUBFAMILY NOT NAMED
Glyma.11G248900.Wm82.a4.v1	(1 of 2) PTHR12419//PTHR12419:SF24 - OTU DOMAIN CONTAINING PROTEIN // SUBFAMILY NOT NAMED
Glyma.12G092900.Wm82.a4.v1	(1 of 6) 1.1.1.198 - (+)-borneol dehydrogenase
Glyma.12G099900.Wm82.a4.v1	(1 of 1) PTHR31204:SF1 - TRANSMEMBRANE PROTEIN 97
Glyma.12G162999.Wm82.a4.v1	(1 of 5) PTHR31251:SF9 - SQUAMOSA PROMOTER-BINDING-LIKE PROTEIN 4-RELATED
Glyma.12G192000.Wm82.a4.v1	(1 of 8) PTHR13301//PTHR13301:SF53 - X-BOX TRANSCRIPTION FACTOR-RELATED // CELLULOSE SYNTHASE-LIKE PROTEIN B1-RELATED
Glyma.13G165000.Wm82.a4.v1	-
Glyma.13G195800.Wm82.a4.v1	(1 of 47) KOG4282 - Transcription factor GT-2 and related proteins, contains trihelix DNA-binding/SANT domain
Glyma.13G224400.Wm82.a4.v1	(1 of 4) PTHR11566//PTHR11566:SF45 - DYNAMIN // DYNAMIN-RELATED PROTEIN 4C-RELATED
Glyma.13G236100.Wm82.a4.v1	-
Glyma.14G023300.Wm82.a4.v1	(1 of 4) PTHR10388//PTHR10388:SF16 - EUKARYOTIC TRANSLATION INITIATION FACTOR SUI1 // SUBFAMILY NOT NAMED
Glyma.14G099000.Wm82.a4.v1	(1 of 3) PTHR11748//PTHR11748:SF17 - D-LACTATE DEHYDROGENASE // CYTOKININ DEHYDROGENASE 2-RELATED
Glyma.14G169300.Wm82.a4.v1	(1 of 8) K17469 - sulfate transporter 2, low-affinity (SULTR2)
Glyma.14G191700.Wm82.a4.v1	(1 of 13) PTHR24078//PTHR24078:SF261 - DNAJ HOMOLOG SUBFAMILY C MEMBER // DNAJ (HSP40) HOMOLOG, SUBFAMILY A, MEMBER 3A
Glyma.15G069100.Wm82.a4.v1	(1 of 8) PTHR10687//PTHR10687:SF22 - SECRETORY CARRIER-ASSOCIATED MEMBRANE PROTEIN SCAMP // SECRETORY CARRIER-ASSOCIATED MEMBRANE PROTEIN 1-RELATED
Glyma.15G072700.Wm82.a4.v1	(1 of 4) PTHR15315//PTHR15315:SF20 - RING FINGER PROTEIN 41, 151 // SUBFAMILY NOT NAMED
Glyma.15G141500.Wm82.a4.v1	-
Glyma.15G151300.Wm82.a4.v1	-
Glyma.15G156400.Wm82.a4.v1	(1 of 2) PTHR22765//PTHR22765:SF56 - RING FINGER AND PROTEASE ASSOCIATED DOMAIN-CONTAINING // VACUOLAR-SORTING RECEPTOR 5-RELATED
Glyma.15G224500.Wm82.a4.v1	(1 of 2) PTHR10795:SF444 - SUBTILISIN-LIKE SERINE ENDOPEPTIDASE FAMILY PROTEIN
Glyma.15G263700.Wm82.a4.v1	(1 of 3) PTHR31499:SF2 - MYB FAMILY TRANSCRIPTION FACTOR APL
Glyma.16G054700.Wm82.a4.v1	-
Glyma.16G058500.Wm82.a4.v1	-
Glyma.16G095700.Wm82.a4.v1	(1 of 9) PTHR10891//PTHR10891:SF574 - EF-HAND CALCIUM-BINDING DOMAIN CONTAINING PROTEIN // CALCIUM-BINDING PROTEIN CML30-RELATED
Glyma.16G152200.Wm82.a4.v1	(1 of 6) PTHR31499//PTHR31499:SF4 - FAMILY NOT NAMED // MYB FAMILY TRANSCRIPTION FACTOR-RELATED
Glyma.17G112100.Wm82.a4.v1	(1 of 2227) 2.7.11.1 - Non-specific serine/threonine protein kinase / Threonine-specific protein kinase
Glyma.18G190000.Wm82.a4.v1	(1 of 100) PF14368 - Probable lipid transfer (LTP_2)
Glyma.18G278900.Wm82.a4.v1	(1 of 5) 1.5.5.2 - Proline dehydrogenase
Glyma.19G105400.Wm82.a4.v1	(1 of 10) 5.99.1.2 - DNA topoisomerase / Untwisting enzyme
Glyma.19G110200.Wm82.a4.v1	(1 of 4) PTHR10071//PTHR10071:SF161 - TRANSCRIPTION FACTOR GATA GATA BINDING FACTOR // SUBFAMILY NOT NAMED
Glyma.19G182900.Wm82.a4.v1	-
Glyma.19G211000.Wm82.a4.v1	(1 of 5) PTHR31964//PTHR31964:SF16 - FAMILY NOT NAMED // ADENINE NUCLEOTIDE ALPHA HYDROLASES-LIKE PROTEIN
Glyma.19G258700.Wm82.a4.v1	(1 of 3) PTHR24298//PTHR24298:SF46 - FAMILY NOT NAMED // CYTOCHROME P450 78A6-RELATED
Glyma.19G261600.Wm82.a4.v1	(1 of 5) 1.3.1.22 - 3-oxo-5-alpha-steroid 4-dehydrogenase (NADP(+)) / Cholestenone 5-alpha-reductase
Glyma.19G262400.Wm82.a4.v1	-
Glyma.20G021500.Wm82.a4.v1	(1 of 31) PF14299 - Phloem protein 2 (PP2)
Glyma.20G044800.Wm82.a4.v1	(1 of 106) PF03168 - Late embryogenesis abundant protein (LEA_2)
Glyma.02G033200.Wm82.a4.v1	(1 of 4) PTHR14155//PTHR14155:SF123 - RING FINGER DOMAIN-CONTAINING // RING-H2 FINGER PROTEIN ATL47	yellow	0.00155	-0.515
Glyma.18G285400.Wm82.a4.v1	(1 of 1) PTHR34948//PTHR34948:SF2 - FAMILY NOT NAMED // TRIPHOSPHATE TUNEL METALLOENZYME 3
Glyma.04G160400.Wm82.a4.v1	(1 of 1) PTHR13068//PTHR13068:SF23 - CGI-12 PROTEIN-RELATED // MITOCHONDRIAL TRANSCRIPTION TERMINATION FACTOR FAMILY PROTEIN
Glyma.10G027000.Wm82.a4.v1	(1 of 3) PTHR34798//PTHR34798:SF1 - FAMILY NOT NAMED // TIC-LIKE PROTEIN
Glyma.17G233100.Wm82.a4.v1	-
Glyma.11G248100.Wm82.a4.v1	(1 of 4) PTHR21043 - IOJAP SUPERFAMILY ORTHOLOG
Glyma.18G042600.Wm82.a4.v1	(1 of 6) PTHR22604//PTHR22604:SF132 - OXIDOREDUCTASES // NAD(P)-BINDING ROSSMANN-FOLD SUPERFAMILY PROTEIN
Glyma.03G020700.Wm82.a4.v1	(1 of 2227) 2.7.11.1 - Non-specific serine/threonine protein kinase / Threonine-specific protein kinase
Glyma.13G049400.Wm82.a4.v1	(1 of 3) K03350 - anaphase-promoting complex subunit 3 (APC3, CDC27)
Glyma.01G034800.Wm82.a4.v1	(1 of 14) PTHR32285//PTHR32285:SF57 - FAMILY NOT NAMED // PROTEIN ALTERED XYLOGLUCAN 4
Glyma.01G221300.Wm82.a4.v1	(1 of 9) K16281 - RING-H2 zinc finger protein RHA1 (RHA1)
Glyma.04G156400.Wm82.a4.v1	-
Glyma.05G213500.Wm82.a4.v1	(1 of 2) PTHR31071//PTHR31071:SF6 - FAMILY NOT NAMED // GB|AAF24581.1
Glyma.20G043800.Wm82.a4.v1	(1 of 3) K03635 - molybdopterin synthase catalytic subunit (MOCS2, moaE)
Glyma.16G151100.Wm82.a4.v1	(1 of 1) PTHR10060:SF24 - DEOXYRIBONUCLEASE TATDN3-RELATED
Glyma.07G073300.Wm82.a4.v1	(1 of 1) 3.5.4.34//3.5.4.37 - tRNA(Ala)(adenine(37)) deaminase // Double-stranded RNA adenine deaminase / DsRNA adenosine deaminase
Glyma.20G118300.Wm82.a4.v1	(1 of 73) 3.1.4.46 - Glycerophosphodiester phosphodiesterase / Glycerophosphoryl diester phosphodiesterase
Glyma.01G000100.Wm82.a4.v1	(1 of 15) 2.2.1.9//4.2.1.113//4.2.99.20 - 2-succinyl-5-enolpyruvyl-6-hydroxy-3-cyclohexene-1-carboxylic-acid synthase / SEPHCHC synthase // o-succinylbenzoate synthase / OSBS // 2-succinyl-6-hydroxy-2,4-cyclohexadiene-1-carboxylate synthase / SHCHC synthase
Glyma.01G084500.Wm82.a4.v1	(1 of 3) PTHR12385:SF36 - PLASMA-MEMBRANE CHOLINE TRANSPORTER-LIKE PROTEIN
Glyma.01G132932.Wm82.a4.v1	(1 of 2227) 2.7.11.1 - Non-specific serine/threonine protein kinase / Threonine-specific protein kinase
Glyma.02G017200.Wm82.a4.v1	(1 of 2) PTHR10459//PTHR10459:SF59 - DNA LIGASE // SUBFAMILY NOT NAMED
Glyma.02G041500.Wm82.a4.v1	(1 of 8) PTHR11945//PTHR11945:SF179 - MADS BOX PROTEIN // MADS-BOX PROTEIN SVP
Glyma.02G143400.Wm82.a4.v1	(1 of 25) PF14309//PF14383 - Domain of unknown function (DUF4378) (DUF4378) // DUF761-associated sequence motif (VARLMGL)
Glyma.02G151200.Wm82.a4.v1	(1 of 3) PTHR24198//PTHR24198:SF67 - ANKYRIN REPEAT AND PROTEIN KINASE DOMAIN-CONTAINING PROTEIN // SUBFAMILY NOT NAMED
Glyma.03G017800.Wm82.a4.v1	-
Glyma.03G108100.Wm82.a4.v1	(1 of 673) PF01535 - PPR repeat (PPR)
Glyma.05G088700.Wm82.a4.v1	-
Glyma.05G090400.Wm82.a4.v1	(1 of 20) PF04784//PF14389 - Protein of unknown function, DUF547 (DUF547) // Leucine-zipper of ternary complex factor MIP1 (Lzipper-MIP1)
Glyma.06G161100.Wm82.a4.v1	(1 of 2) PTHR16193//PTHR16193:SF0 - UNCHARACTERIZED // TETRATRICOPEPTIDE REPEAT PROTEIN 27
Glyma.06G206400.Wm82.a4.v1	(1 of 14) PTHR31992:SF8 - DOF ZINC FINGER PROTEIN DOF1.1-RELATED
Glyma.07G086900.Wm82.a4.v1	-
Glyma.07G182300.Wm82.a4.v1	(1 of 2) PTHR11556//PTHR11556:SF12 - FRUCTOSE-1,6-BISPHOSPHATASE-RELATED // SUBFAMILY NOT NAMED
Glyma.07G268300.Wm82.a4.v1	-
Glyma.09G196100.Wm82.a4.v1	(1 of 2) PTHR14374 - FOIE GRAS
Glyma.09G218500.Wm82.a4.v1	(1 of 4) K12400 - AP-4 complex subunit epsilon-1 (AP4E1)
Glyma.09G281000.Wm82.a4.v1	(1 of 8) PF12579 - Protein of unknown function (DUF3755) (DUF3755)
Glyma.11G139100.Wm82.a4.v1	(1 of 3) PTHR31867:SF29 - EXPANSIN-A3
Glyma.11G228900.Wm82.a4.v1	(1 of 4) K09588 - cytochrome P450, family 90, subfamily A, polypeptide 1 (CYP90A1, CPD)
Glyma.13G056900.Wm82.a4.v1	(1 of 4) K14863 - ribosome biogenesis protein YTM1 (YTM1, WDR12)
Glyma.13G125100.Wm82.a4.v1	(1 of 2) PTHR22957:SF299 - RABGAP/TBC DOMAIN-CONTAINING PROTEIN
Glyma.13G205500.Wm82.a4.v1	(1 of 3) PTHR34682//PTHR34682:SF2 - FAMILY NOT NAMED // DNA BINDING PROTEIN
Glyma.13G209700.Wm82.a4.v1	(1 of 273) PF00646 - F-box domain (F-box)
Glyma.13G310202.Wm82.a4.v1	-
Glyma.13G371300.Wm82.a4.v1	(1 of 2) PTHR31150//PTHR31150:SF5 - FAMILY NOT NAMED // ZINC ION BINDING PROTEIN
Glyma.14G188800.Wm82.a4.v1	-
Glyma.15G059100.Wm82.a4.v1	(1 of 4) PTHR31422:SF2 - T10O22.23
Glyma.15G244700.Wm82.a4.v1	(1 of 2) PTHR12620//PTHR12620:SF4 - U2 SNRNP AUXILIARY FACTOR, SMALL SUBUNIT // ZINC FINGER CCCH DOMAIN-CONTAINING PROTEIN 5
Glyma.16G006900.Wm82.a4.v1	(1 of 2) PTHR13315//PTHR13315:SF3 - METALLO PHOSPHOESTERASE RELATED // SUBFAMILY NOT NAMED
Glyma.16G057902.Wm82.a4.v1	-
Glyma.16G075800.Wm82.a4.v1	(1 of 7) PTHR21562//PTHR21562:SF4 - NOTUM-RELATED // PECTINACETYLESTERASE FAMILY PROTEIN
Glyma.17G120833.Wm82.a4.v1	(1 of 2) PTHR23245//PTHR23245:SF36 - UNCHARACTERIZED // TRNA (GUANINE(37)-N1)-METHYLTRANSFERASE
Glyma.17G170400.Wm82.a4.v1	(1 of 1) K13717 - OTU domain-containing protein 3 [EC:3.4.19.12] (OTUD3)
Glyma.17G249800.Wm82.a4.v1	(1 of 6) PF06708 - Protein of unknown function (DUF1195) (DUF1195)
Glyma.18G019400.Wm82.a4.v1	(1 of 2) PTHR13683:SF303 - ASPARTIC PROTEINASE-LIKE PROTEIN 1
Glyma.18G289200.Wm82.a4.v1	-
Glyma.19G005600.Wm82.a4.v1	-
Glyma.20G046100.Wm82.a4.v1	(1 of 9) PTHR23155//PTHR23155:SF560 - LEUCINE-RICH REPEAT-CONTAINING PROTEIN // SUBFAMILY NOT NAMED
Glyma.20G200300.Wm82.a4.v1	(1 of 2) PTHR23354//PTHR23354:SF74 - NUCLEOLAR PROTEIN 7/ESTROGEN RECEPTOR COACTIVATOR-RELATED // SUBFAMILY NOT NAMED
Glyma.01G012700.Wm82.a4.v1	(1 of 6) PTHR24115//PTHR24115:SF413 - FAMILY NOT NAMED // KINESIN-LIKE PROTEIN KIN12A-RELATED
Glyma.01G038900.Wm82.a4.v1	(1 of 2) PTHR34277//PTHR34277:SF2 - FAMILY NOT NAMED // CLAVATA3/ESR (CLE)-RELATED PROTEIN 26
Glyma.01G067300.Wm82.a4.v1	(1 of 4) PTHR19376//PTHR19376:SF37 - DNA-DIRECTED RNA POLYMERASE // DNA-DIRECTED RNA POLYMERASE II SUBUNIT RPB1
Glyma.01G122400.Wm82.a4.v1	-
Glyma.01G131500.Wm82.a4.v1	(1 of 7) PTHR24347//PTHR24347:SF215 - SERINE/THREONINE-PROTEIN KINASE // CBL-INTERACTING SERINE/THREONINE-PROTEIN KINASE 20
Glyma.01G131900.Wm82.a4.v1	(1 of 4) PTHR33057:SF22 - OVATE FAMILY PROTEIN 1-RELATED
Glyma.01G154551.Wm82.a4.v1	-
Glyma.01G163100.Wm82.a4.v1	(1 of 4) PTHR31235//PTHR31235:SF67 - FAMILY NOT NAMED // PEROXIDASE 64
Glyma.01G175700.Wm82.a4.v1	-
Glyma.01G188600.Wm82.a4.v1	(1 of 8) PTHR31729:SF0 - ETHYLENE-RESPONSIVE TRANSCRIPTION FACTOR ERF008-RELATED
Glyma.01G211400.Wm82.a4.v1	-
Glyma.01G236800.Wm82.a4.v1	(1 of 38) PF04570 - zinc-finger of the FCS-type, C2-C2 (zf-FLZ)
Glyma.01G242500.Wm82.a4.v1	-
Glyma.02G000300.Wm82.a4.v1	(1 of 2) PTHR36399:SF1 - NAD(P)H DEHYDROGENASE 18
Glyma.02G035800.Wm82.a4.v1	(1 of 2) PTHR10044:SF108 - S-RIBONUCLEASE BINDING PROTEIN SBP1-RELATED
Glyma.02G057600.Wm82.a4.v1	-
Glyma.02G087000.Wm82.a4.v1	(1 of 6) 2.7.13.3//3.1.3.16 - Histidine kinase / Protein kinase (histidine) // Protein-serine/threonine phosphatase / Serine/threonine specific protein phosphatase
Glyma.02G123302.Wm82.a4.v1	(1 of 3) PTHR11129:SF2 - GERANYLGERANYL TRANSFERASE TYPE-2 SUBUNIT ALPHA
Glyma.02G130400.Wm82.a4.v1	(1 of 20) 2.3.1.74 - Naringenin-chalcone synthase / Flavonone synthase
Glyma.02G135400.Wm82.a4.v1	(1 of 4) PTHR31003//PTHR31003:SF7 - MYB FAMILY TRANSCRIPTION FACTOR // F14J22.20 PROTEIN
Glyma.02G146700.Wm82.a4.v1	(1 of 30) PF05910 - Plant protein of unknown function (DUF868) (DUF868)
Glyma.02G151002.Wm82.a4.v1	(1 of 4) PTHR19847 - WD40 REPEAT PROTEIN
Glyma.02G219267.Wm82.a4.v1	(1 of 3) PTHR10566//PTHR10566:SF41 - CHAPERONE-ACTIVITY OF BC1 COMPLEX CABC1 -RELATED // SUBFAMILY NOT NAMED
Glyma.02G254200.Wm82.a4.v1	(1 of 13) PTHR24078//PTHR24078:SF261 - DNAJ HOMOLOG SUBFAMILY C MEMBER // DNAJ (HSP40) HOMOLOG, SUBFAMILY A, MEMBER 3A
Glyma.02G276300.Wm82.a4.v1	-
Glyma.02G282202.Wm82.a4.v1	(1 of 4) PTHR13050 - USE1-LIKE PROTEIN
Glyma.02G287500.Wm82.a4.v1	-
Glyma.02G302700.Wm82.a4.v1	(1 of 2) PTHR33602:SF1 - REGULATORY PROTEIN RECX
Glyma.03G011366.Wm82.a4.v1	(1 of 6) PTHR13501 - CHLOROPLAST 50S RIBOSOMAL PROTEIN L22-RELATED
Glyma.03G013600.Wm82.a4.v1	(1 of 3) 3.5.4.34 - tRNA(Ala)(adenine(37)) deaminase
Glyma.03G022450.Wm82.a4.v1	(1 of 5) PTHR24115:SF533 - ARMADILLO REPEAT-CONTAINING KINESIN-LIKE PROTEIN 2
Glyma.03G075100.Wm82.a4.v1	(1 of 36) PTHR23155//PTHR23155:SF563 - LEUCINE-RICH REPEAT-CONTAINING PROTEIN // SUBFAMILY NOT NAMED
Glyma.03G081900.Wm82.a4.v1	(1 of 4) PTHR10641:SF457 - TRANSCRIPTION FACTOR AS1
Glyma.03G082800.Wm82.a4.v1	(1 of 3) PTHR14221//PTHR14221:SF7 - WD REPEAT DOMAIN 44 // WD-40 REPEAT PROTEIN-RELATED
Glyma.03G087600.Wm82.a4.v1	(1 of 10) PF00931//PF01582 - NB-ARC domain (NB-ARC) // TIR domain (TIR)
Glyma.03G108500.Wm82.a4.v1	(1 of 13) PF01535//PF12854//PF13041//PF14432 - PPR repeat (PPR) // PPR repeat (PPR_1) // PPR repeat family (PPR_2) // DYW family of nucleic acid deaminases (DYW_deaminase)
Glyma.03G137200.Wm82.a4.v1	(1 of 36) PTHR23155//PTHR23155:SF563 - LEUCINE-RICH REPEAT-CONTAINING PROTEIN // SUBFAMILY NOT NAMED
Glyma.03G139100.Wm82.a4.v1	(1 of 5) PTHR22601:SF8 - OLIGOPEPTIDE TRANSPORTER 1-RELATED
Glyma.03G147200.Wm82.a4.v1	-
Glyma.03G158766.Wm82.a4.v1	(1 of 3) PTHR10285//PTHR10285:SF81 - URIDINE KINASE // SUBFAMILY NOT NAMED
Glyma.03G187800.Wm82.a4.v1	-
Glyma.03G188000.Wm82.a4.v1	(1 of 5) PTHR31065:SF4 - PLATZ TRANSCRIPTION FACTOR FAMILY PROTEIN
Glyma.03G223700.Wm82.a4.v1	-
Glyma.03G231500.Wm82.a4.v1	(1 of 2) PTHR11075:SF6 - CLASS I PEPTIDE CHAIN RELEASE FACTOR
Glyma.03G240700.Wm82.a4.v1	(1 of 9) PF06364 - Protein of unknown function (DUF1068) (DUF1068)
Glyma.04G029000.Wm82.a4.v1	(1 of 2) 2.1.1.198 - 16S rRNA (cytidine(1402)-2'-O)-methyltransferase
Glyma.04G029333.Wm82.a4.v1	(1 of 3) 2.4.1.245 - Alpha,alpha-trehalose synthase / Trehalose synthetase
Glyma.04G032000.Wm82.a4.v1	(1 of 2) PTHR13600:SF12 - LEUCINE CARBOXYL METHYLTRANSFERASE
Glyma.04G036460.Wm82.a4.v1	(1 of 5) PTHR19302:SF33 - GAMMA-TUBULIN COMPLEX COMPONENT 5
Glyma.04G050550.Wm82.a4.v1	(1 of 4) PTHR10288//PTHR10288:SF171 - KH DOMAIN CONTAINING RNA BINDING PROTEIN // F17H15.1/F17H15.1-RELATED
Glyma.04G053800.Wm82.a4.v1	(1 of 6) PTHR13832//PTHR13832:SF335 - PROTEIN PHOSPHATASE 2C // PROTEIN PHOSPHATASE 2C 16-RELATED
Glyma.04G066900.Wm82.a4.v1	(1 of 6) K14515 - EIN3-binding F-box protein (EBF1_2)
Glyma.04G068751.Wm82.a4.v1	(1 of 12) PF14111 - Domain of unknown function (DUF4283) (DUF4283)
Glyma.04G107300.Wm82.a4.v1	(1 of 3) K10770 - alkylated DNA repair protein alkB homolog 8 [EC:1.14.11.- 2.1.1.229] (ALKBH8)
Glyma.04G157300.Wm82.a4.v1	(1 of 2) PTHR10906//PTHR10906:SF9 - SECY/SEC61-ALPHA FAMILY MEMBER // PREPROTEIN TRANSLOCASE SUBUNIT SCY1, CHLOROPLASTIC
Glyma.04G186300.Wm82.a4.v1	(1 of 1) PTHR24320//PTHR24320:SF100//PTHR24320:SF81 - FAMILY NOT NAMED // SUBFAMILY NOT NAMED // NAD(P)-BINDING ROSSMANN-FOLD SUPERFAMILY PROTEIN
Glyma.04G193200.Wm82.a4.v1	(1 of 45) PF10551 - MULE transposase domain (MULE)
Glyma.05G002250.Wm82.a4.v1	(1 of 27) PF05938 - Plant self-incompatibility protein S1 (Self-incomp_S1)
Glyma.05G024700.Wm82.a4.v1	-
Glyma.05G050800.Wm82.a4.v1	(1 of 6) PTHR31066:SF2 - GB|AAD14519.1
Glyma.05G056200.Wm82.a4.v1	(1 of 5) PTHR23111:SF23 - ZINC FINGER (RAN-BINDING) DOMAIN-CONTAINING PROTEIN
Glyma.05G068500.Wm82.a4.v1	(1 of 38) PF04570 - zinc-finger of the FCS-type, C2-C2 (zf-FLZ)
Glyma.05G069150.Wm82.a4.v1	(1 of 3) PTHR11566//PTHR11566:SF77 - DYNAMIN // SUBFAMILY NOT NAMED
Glyma.05G091650.Wm82.a4.v1	(1 of 12) K13525 - transitional endoplasmic reticulum ATPase (VCP, CDC48)
Glyma.05G091751.Wm82.a4.v1	-
Glyma.05G105100.Wm82.a4.v1	(1 of 4) PTHR23213//PTHR23213:SF215 - FORMIN-RELATED // SUBFAMILY NOT NAMED
Glyma.05G119400.Wm82.a4.v1	(1 of 26) PF00646//PF01344 - F-box domain (F-box) // Kelch motif (Kelch_1)
Glyma.05G167600.Wm82.a4.v1	(1 of 2) PF07714//PF13857 - Protein tyrosine kinase (Pkinase_Tyr) // Ankyrin repeats (many copies) (Ank_5)
Glyma.05G232800.Wm82.a4.v1	(1 of 4) PTHR12121:SF41 - CARBON CATABOLITE REPRESSOR PROTEIN 4 HOMOLOG 3
Glyma.05G244100.Wm82.a4.v1	(1 of 1) PTHR11362//PTHR11362:SF38 - PHOSPHATIDYLETHANOLAMINE-BINDING PROTEIN // PROTEIN MOTHER OF FT AND TF 1
Glyma.06G005700.Wm82.a4.v1	(1 of 1) 2.4.2.28 - S-methyl-5'-thioadenosine phosphorylase / MTAPase
Glyma.06G012200.Wm82.a4.v1	(1 of 2) PTHR12565//PTHR12565:SF149 - STEROL REGULATORY ELEMENT-BINDING PROTEIN // SUBFAMILY NOT NAMED
Glyma.06G022300.Wm82.a4.v1	(1 of 4) PTHR22952//PTHR22952:SF95 - CAMP-RESPONSE ELEMENT BINDING PROTEIN-RELATED // ATBZIP TRANSCRIPTION FACTOR-RELATED
Glyma.06G029800.Wm82.a4.v1	(1 of 4) PTHR10529:SF242 - PROTEIN M03E7.4
Glyma.06G032100.Wm82.a4.v1	(1 of 2) PTHR13600:SF12 - LEUCINE CARBOXYL METHYLTRANSFERASE
Glyma.06G033500.Wm82.a4.v1	(1 of 753) PF13041 - PPR repeat family (PPR_2)
Glyma.06G052000.Wm82.a4.v1	(1 of 2) PTHR11040//PTHR11040:SF52 - ZINC/IRON TRANSPORTER // SUBFAMILY NOT NAMED
Glyma.06G110500.Wm82.a4.v1	(1 of 4) PTHR28259//PTHR28259:SF1 - FAMILY NOT NAMED // UPF0695 MEMBRANE PROTEIN YOR390W-RELATED
Glyma.06G117200.Wm82.a4.v1	(1 of 2) PTHR10209//PTHR10209:SF189 - OXIDOREDUCTASE, 2OG-FE II OXYGENASE FAMILY PROTEIN // 1-AMINOCYCLOPROPANE-1-CARBOXYLATE OXIDASE 5
Glyma.06G128100.Wm82.a4.v1	(1 of 8) PTHR10209//PTHR10209:SF167 - OXIDOREDUCTASE, 2OG-FE II OXYGENASE FAMILY PROTEIN // SUBFAMILY NOT NAMED
Glyma.06G130267.Wm82.a4.v1	(1 of 3) PTHR19959//PTHR19959:SF171 - KINESIN LIGHT CHAIN // SUBFAMILY NOT NAMED
Glyma.06G130333.Wm82.a4.v1	(1 of 3) PTHR19959//PTHR19959:SF171 - KINESIN LIGHT CHAIN // SUBFAMILY NOT NAMED
Glyma.06G149301.Wm82.a4.v1	-
Glyma.06G160100.Wm82.a4.v1	(1 of 4) PTHR24343:SF161 - SERINE/THREONINE-PROTEIN KINASE SRK2J
Glyma.06G165100.Wm82.a4.v1	(1 of 2) PTHR10887//PTHR10887:SF372 - DNA2/NAM7 HELICASE FAMILY // SUBFAMILY NOT NAMED
Glyma.06G169000.Wm82.a4.v1	(1 of 4) PTHR13780//PTHR13780:SF45 - AMP-ACTIVATED PROTEIN KINASE, GAMMA REGULATORY SUBUNIT // CBS DOMAIN-CONTAINING PROTEIN CBSCBSPB4-RELATED
Glyma.06G175466.Wm82.a4.v1	(1 of 12) 2.4.1.82 - Galactinol--sucrose galactosyltransferase / Raffinose synthase
Glyma.06G201100.Wm82.a4.v1	(1 of 13) PTHR12542//PTHR12542:SF29 - EXOCYST COMPLEX PROTEIN EXO70 // SUBFAMILY NOT NAMED
Glyma.06G207751.Wm82.a4.v1	(1 of 8) PTHR12601//PTHR12601:SF6 - EUKARYOTIC TRANSLATION INITIATION FACTOR 3 SUBUNIT EIF-3 // CLUSTERED MITOCHONDRIA PROTEIN HOMOLOG
Glyma.06G214300.Wm82.a4.v1	-
Glyma.06G244302.Wm82.a4.v1	(1 of 179) 3.6.4.12 - DNA helicase
Glyma.06G250751.Wm82.a4.v1	-
Glyma.06G255900.Wm82.a4.v1	(1 of 57) PF00954//PF01453//PF07714//PF08276 - S-locus glycoprotein domain (S_locus_glycop) // D-mannose binding lectin (B_lectin) // Protein tyrosine kinase (Pkinase_Tyr) // PAN-like domain (PAN_2)
Glyma.06G261400.Wm82.a4.v1	(1 of 1) PF00931//PF00954//PF07725//PF08276//PF13676 - NB-ARC domain (NB-ARC) // S-locus glycoprotein domain (S_locus_glycop) // Leucine Rich Repeat (LRR_3) // PAN-like domain (PAN_2) // TIR domain (TIR_2)
Glyma.06G264900.Wm82.a4.v1	-
Glyma.06G301300.Wm82.a4.v1	(1 of 8) PTHR31241:SF2 - DEHYDRATION-RESPONSIVE ELEMENT-BINDING PROTEIN 2A-RELATED
Glyma.06G311800.Wm82.a4.v1	(1 of 90) PF12776 - Myb/SANT-like DNA-binding domain (Myb_DNA-bind_3)
Glyma.06G322800.Wm82.a4.v1	(1 of 2) PTHR28498:SF1 - ZINC FINGER SWIM DOMAIN-CONTAINING PROTEIN 7
Glyma.06G325402.Wm82.a4.v1	(1 of 3) PF00237//PF02776 - Ribosomal protein L22p/L17e (Ribosomal_L22) // Thiamine pyrophosphate enzyme, N-terminal TPP binding domain (TPP_enzyme_N)
Glyma.06G325566.Wm82.a4.v1	(1 of 3) PF00237//PF02776 - Ribosomal protein L22p/L17e (Ribosomal_L22) // Thiamine pyrophosphate enzyme, N-terminal TPP binding domain (TPP_enzyme_N)
Glyma.07G036900.Wm82.a4.v1	(1 of 6) PTHR10476//PTHR10476:SF12 - CHARGED MULTIVESICULAR BODY PROTEIN // SUBFAMILY NOT NAMED
Glyma.07G082600.Wm82.a4.v1	(1 of 2227) 2.7.11.1 - Non-specific serine/threonine protein kinase / Threonine-specific protein kinase
Glyma.07G085400.Wm82.a4.v1	(1 of 2) 6.3.4.19 - tRNA(Ile)-lysidine synthetase / Isoleucine-specific transfer ribonucleate lysidine synthetase
Glyma.07G096900.Wm82.a4.v1	(1 of 4) K08099 - chlorophyllase (E3.1.1.14)
Glyma.07G117300.Wm82.a4.v1	(1 of 38) PF04570 - zinc-finger of the FCS-type, C2-C2 (zf-FLZ)
Glyma.07G131300.Wm82.a4.v1	(1 of 3) PTHR21562//PTHR21562:SF6 - NOTUM-RELATED // PECTINACETYLESTERASE FAMILY PROTEIN
Glyma.07G159050.Wm82.a4.v1	-
Glyma.07G222000.Wm82.a4.v1	-
Glyma.07G237500.Wm82.a4.v1	(1 of 157) PF04043 - Plant invertase/pectin methylesterase inhibitor (PMEI)
Glyma.07G270400.Wm82.a4.v1	(1 of 3) K14724 - solute carrier family 9 (sodium/hydrogen exchanger), member 8 (SLC9A8, NHE8)
Glyma.08G003033.Wm82.a4.v1	(1 of 21) 1.6.5.9 - NADH:ubiquinone reductase (non-electrogenic) / Ubiquinone reductase
Glyma.08G005700.Wm82.a4.v1	(1 of 74) PF05678 - VQ motif (VQ)
Glyma.08G020200.Wm82.a4.v1	(1 of 2) PTHR34180//PTHR34180:SF1 - FAMILY NOT NAMED // MUTANT TAN
Glyma.08G036300.Wm82.a4.v1	(1 of 3) PTHR11741//PTHR11741:SF3 - ELONGATION FACTOR TS // ELONGATION FACTOR TS
Glyma.08G048567.Wm82.a4.v1	(1 of 3) PTHR10108:SF793 - PHOSPHOETHANOLAMINE N-METHYLTRANSFERASE 1-RELATED
Glyma.08G083451.Wm82.a4.v1	(1 of 4) PTHR13711//PTHR13711:SF200 - SWI/SNF-RELATED CHROMATIN BINDING PROTEIN // HIGH MOBILITY GROUP B PROTEIN 14
Glyma.08G122500.Wm82.a4.v1	(1 of 2) PTHR32060//PTHR32060:SF8 - FAMILY NOT NAMED // PEPTIDASE S41 FAMILY PROTEIN
Glyma.08G132800.Wm82.a4.v1	(1 of 2) PTHR24326//PTHR24326:SF196 - FAMILY NOT NAMED // HOMEOBOX-LEUCINE ZIPPER PROTEIN ATHB-16-RELATED
Glyma.08G142950.Wm82.a4.v1	-
Glyma.08G186500.Wm82.a4.v1	(1 of 1) K10767 - alkylated DNA repair protein alkB homolog 5 (ALKBH5)
Glyma.08G197000.Wm82.a4.v1	(1 of 15) K14664 - IAA-amino acid hydrolase [EC:3.5.1.-] (ILR1)
Glyma.08G213700.Wm82.a4.v1	(1 of 4) PTHR23272//PTHR23272:SF15 - BED FINGER-RELATED // SUBFAMILY NOT NAMED
Glyma.08G216200.Wm82.a4.v1	(1 of 2) PTHR10366:SF461 - CINNAMOYL-COA:NADP OXIDOREDUCTASE-LIKE 1-RELATED
Glyma.08G280600.Wm82.a4.v1	(1 of 4) PTHR10177//PTHR10177:SF234 - CYCLINE // CYCLIN-D2-1
Glyma.08G284700.Wm82.a4.v1	(1 of 1) PF00004//PF14226 - ATPase family associated with various cellular activities (AAA) (AAA) // non-haem dioxygenase in morphine synthesis N-terminal (DIOX_N)
Glyma.08G293100.Wm82.a4.v1	(1 of 6) K11644 - paired amphipathic helix protein Sin3a (SIN3A)
Glyma.08G329000.Wm82.a4.v1	-
Glyma.08G345100.Wm82.a4.v1	(1 of 1) PTHR37239:SF1 - EPIDERMAL PATTERNING FACTOR-LIKE PROTEIN 9
Glyma.08G367700.Wm82.a4.v1	(1 of 2) PTHR21148//PTHR21148:SF26 - PHOSDUCIN-RELATED // QUEUINE TRNA-RIBOSYLTRANSFERASE SUBUNIT QTRTD1
Glyma.09G032400.Wm82.a4.v1	-
Glyma.09G062800.Wm82.a4.v1	(1 of 7) PTHR10071//PTHR10071:SF191 - TRANSCRIPTION FACTOR GATA GATA BINDING FACTOR // SUBFAMILY NOT NAMED
Glyma.09G067300.Wm82.a4.v1	(1 of 6) PTHR33469:SF3 - PROTEIN ELF4-LIKE 2-RELATED
Glyma.09G125900.Wm82.a4.v1	(1 of 455) PF00560 - Leucine Rich Repeat (LRR_1)
Glyma.09G148400.Wm82.a4.v1	(1 of 5) PTHR14237//PTHR14237:SF28 - MOLYBDOPTERIN COFACTOR SULFURASE MOSC // CATALYTIC/ PYRIDOXAL PHOSPHATE BINDING PROTEIN
Glyma.09G156302.Wm82.a4.v1	(1 of 14) PTHR11075 - PEPTIDE CHAIN RELEASE FACTOR
Glyma.09G165500.Wm82.a4.v1	-
Glyma.09G174400.Wm82.a4.v1	(1 of 2) K14998 - surfeit locus 1 family protein (SURF1, SHY1)
Glyma.09G174902.Wm82.a4.v1	(1 of 3) PTHR10091//PTHR10091:SF8 - ALDOSE-1-EPIMERASE // SUBFAMILY NOT NAMED
Glyma.09G211400.Wm82.a4.v1	(1 of 4) PTHR31499:SF5 - HOMEODOMAIN-LIKE SUPERFAMILY PROTEIN
Glyma.09G212000.Wm82.a4.v1	(1 of 10) PF09353 - Domain of unknown function (DUF1995) (DUF1995)
Glyma.09G225300.Wm82.a4.v1	(1 of 4) PTHR32295:SF35 - PROTEIN IQ-DOMAIN 11
Glyma.09G230000.Wm82.a4.v1	-
Glyma.09G232800.Wm82.a4.v1	-
Glyma.09G238400.Wm82.a4.v1	(1 of 11) PTHR31948:SF8 - ZINC-FINGER HOMEODOMAIN PROTEIN 10-RELATED
Glyma.09G258400.Wm82.a4.v1	-
Glyma.09G282800.Wm82.a4.v1	(1 of 2) PTHR33524:SF1 - SET DOMAIN-CONTAINING PROTEIN 9
Glyma.10G012200.Wm82.a4.v1	(1 of 753) PF13041 - PPR repeat family (PPR_2)
Glyma.10G038200.Wm82.a4.v1	-
Glyma.10G045600.Wm82.a4.v1	(1 of 6) PTHR21726:SF49 - PHOSPHATIDYLINOSITOL N-ACETYGLUCOSAMINLYTRANSFERASE SUBUNIT P-LIKE PROTEIN
Glyma.10G046900.Wm82.a4.v1	-
Glyma.10G064200.Wm82.a4.v1	(1 of 6) PTHR11062//PTHR11062:SF66 - EXOSTOSIN HEPARAN SULFATE GLYCOSYLTRANSFERASE -RELATED // SUBFAMILY NOT NAMED
Glyma.10G088100.Wm82.a4.v1	(1 of 7) PTHR24007 - BRCA1-ASSOCIATED PROTEIN
Glyma.10G113802.Wm82.a4.v1	(1 of 1) PTHR19241//PTHR19241:SF186 - ATP-BINDING CASSETTE TRANSPORTER // ABC TRANSPORTER G FAMILY MEMBER 12-RELATED
Glyma.10G121600.Wm82.a4.v1	(1 of 7) PTHR11361:SF82 - DNA MISMATCH REPAIR PROTEIN MSH1, MITOCHONDRIAL
Glyma.10G130200.Wm82.a4.v1	(1 of 1) PTHR37226:SF1 - GENOMIC DNA, CHROMOSOME 3, BAC CLONE:F14O13
Glyma.10G138800.Wm82.a4.v1	(1 of 6) K12126 - phytochrome-interacting factor 3 (PIF3)
Glyma.10G148100.Wm82.a4.v1	(1 of 25) PF07816 - Protein of unknown function (DUF1645) (DUF1645)
Glyma.10G167600.Wm82.a4.v1	-
Glyma.10G191333.Wm82.a4.v1	(1 of 10) 3.4.21.102 - C-terminal processing peptidase / Tsp protease
Glyma.10G231700.Wm82.a4.v1	(1 of 1) PTHR11972//PTHR11972:SF79 - NADPH OXIDASE // SUBFAMILY NOT NAMED
Glyma.10G236900.Wm82.a4.v1	(1 of 87) PF12937 - F-box-like (F-box-like)
Glyma.10G249800.Wm82.a4.v1	(1 of 3) PTHR10026//PTHR10026:SF67 - CYCLIN // SUBFAMILY NOT NAMED
Glyma.10G284100.Wm82.a4.v1	(1 of 7) PTHR13789//PTHR13789:SF185 - MONOOXYGENASE // FAD/NAD(P)-BINDING OXIDOREDUCTASE FAMILY PROTEIN
Glyma.10G289000.Wm82.a4.v1	(1 of 12) PF04842 - Plant protein of unknown function (DUF639) (DUF639)
Glyma.11G007100.Wm82.a4.v1	(1 of 4) PTHR23257//PTHR23257:SF429 - SERINE-THREONINE PROTEIN KINASE // SUBFAMILY NOT NAMED
Glyma.11G037100.Wm82.a4.v1	(1 of 2) PTHR13789//PTHR13789:SF224 - MONOOXYGENASE // CTF2A LIKE OXIDOREDUCTASE-RELATED
Glyma.11G056000.Wm82.a4.v1	(1 of 2) K13168 - splicing factor, arginine/serine-rich 16 (SFRS16)
Glyma.11G056100.Wm82.a4.v1	(1 of 16) PF07939 - Protein of unknown function (DUF1685) (DUF1685)
Glyma.11G068100.Wm82.a4.v1	-
Glyma.11G069800.Wm82.a4.v1	(1 of 2) PTHR11122:SF12 - ALDOSE 1-EPIMERASE FAMILY PROTEIN
Glyma.11G086300.Wm82.a4.v1	(1 of 2) PTHR10073:SF7 - DNA MISMATCH REPAIR PROTEIN MLH3-RELATED
Glyma.11G092000.Wm82.a4.v1	(1 of 2) PTHR31636//PTHR31636:SF65 - FAMILY NOT NAMED // SCARECROW-LIKE PROTEIN 4-RELATED
Glyma.11G095400.Wm82.a4.v1	(1 of 9) 1.3.1.45 - 2'-hydroxyisoflavone reductase
Glyma.11G104700.Wm82.a4.v1	(1 of 2) PTHR36756//PTHR36756:SF1 - FAMILY NOT NAMED // GENOMIC DNA, CHROMOSOME 3, P1 CLONE: MEB5
Glyma.11G117500.Wm82.a4.v1	(1 of 1) K13195 - cold-inducible RNA-binding protein (CIRBP)
Glyma.11G128900.Wm82.a4.v1	(1 of 1) KOG0027//KOG0032 - Calmodulin and related proteins (EF-Hand superfamily) // Ca2+/calmodulin-dependent protein kinase, EF-Hand protein superfamily
Glyma.11G131800.Wm82.a4.v1	(1 of 3) PTHR24351:SF107 - AGC (CAMP-DEPENDENT, CGMP-DEPENDENT AND PROTEIN KINASE C) KINASE FAMILY PROTEIN
Glyma.11G132300.Wm82.a4.v1	(1 of 52) 3.2.1.21 - Beta-glucosidase / Gentobiase
Glyma.11G138967.Wm82.a4.v1	-
Glyma.11G160000.Wm82.a4.v1	(1 of 7) PTHR31867:SF22 - EXPANSIN-A8
Glyma.11G195650.Wm82.a4.v1	-
Glyma.11G206100.Wm82.a4.v1	(1 of 32) PF00069//PF01657 - Protein kinase domain (Pkinase) // Salt stress response/antifungal (Stress-antifung)
Glyma.11G238700.Wm82.a4.v1	(1 of 6) PTHR33059:SF4 - F28K19.24-RELATED
Glyma.11G242200.Wm82.a4.v1	(1 of 87) K09338 - homeobox-leucine zipper protein (HD-ZIP)
Glyma.12G006400.Wm82.a4.v1	(1 of 2) PTHR19306//PTHR19306:SF6 - STRUCTURAL MAINTENANCE OF CHROMOSOMES 5,6 SMC5, SMC6 // PROTEIN C23H4.6, ISOFORM A-RELATED
Glyma.12G011600.Wm82.a4.v1	(1 of 4) PTHR32295:SF35 - PROTEIN IQ-DOMAIN 11
Glyma.12G039666.Wm82.a4.v1	-
Glyma.12G042800.Wm82.a4.v1	(1 of 2) PTHR12565//PTHR12565:SF126 - STEROL REGULATORY ELEMENT-BINDING PROTEIN // SUBFAMILY NOT NAMED
Glyma.12G045700.Wm82.a4.v1	(1 of 4) K13513 - lysocardiolipin and lysophospholipid acyltransferase (LCLAT1, AGPAT8)
Glyma.12G062700.Wm82.a4.v1	(1 of 3) PTHR31867:SF29 - EXPANSIN-A3
Glyma.12G066500.Wm82.a4.v1	(1 of 6) PTHR33431:SF2 - GB|AAD24366.1
Glyma.12G078700.Wm82.a4.v1	-
Glyma.12G090100.Wm82.a4.v1	(1 of 23) PF11250 - Fantastic Four meristem regulator (FAF)
Glyma.12G120800.Wm82.a4.v1	(1 of 2) PTHR12630//PTHR12630:SF7 - N-LINKED OLIGOSACCHARIDE PROCESSING // EXPRESSED PROTEIN
Glyma.12G132400.Wm82.a4.v1	(1 of 55) PTHR11017//PTHR11017:SF155 - LEUCINE-RICH REPEAT-CONTAINING PROTEIN // SUBFAMILY NOT NAMED
Glyma.12G139800.Wm82.a4.v1	-
Glyma.12G151533.Wm82.a4.v1	-
Glyma.12G153600.Wm82.a4.v1	(1 of 74) PF05678 - VQ motif (VQ)
Glyma.12G154500.Wm82.a4.v1	-
Glyma.12G187100.Wm82.a4.v1	-
Glyma.12G189633.Wm82.a4.v1	-
Glyma.12G203966.Wm82.a4.v1	(1 of 3) PTHR21392//PTHR21392:SF4 - UNCHARACTERIZED // DTW DOMAIN-CONTAINING PROTEIN
Glyma.12G228100.Wm82.a4.v1	(1 of 4) PTHR33388:SF1 - F1K23.3
Glyma.13G045300.Wm82.a4.v1	(1 of 4) PTHR31722//PTHR31722:SF10 - FAMILY NOT NAMED // F1O19.11 PROTEIN
Glyma.13G052600.Wm82.a4.v1	-
Glyma.13G060000.Wm82.a4.v1	(1 of 6) PTHR13115:SF8 - RNA POLYMERASE-ASSOCIATED PROTEIN RTF1 HOMOLOG
Glyma.13G064500.Wm82.a4.v1	(1 of 2) PTHR22844//PTHR22844:SF233 - F-BOX AND WD40 DOMAIN PROTEIN // SUBFAMILY NOT NAMED
Glyma.13G086000.Wm82.a4.v1	(1 of 3) PF01344//PF12937 - Kelch motif (Kelch_1) // F-box-like (F-box-like)
Glyma.13G094600.Wm82.a4.v1	(1 of 2) 2.7.1.16 - Ribulokinase / L-ribulokinase
Glyma.13G107000.Wm82.a4.v1	(1 of 3) PF00237//PF02776 - Ribosomal protein L22p/L17e (Ribosomal_L22) // Thiamine pyrophosphate enzyme, N-terminal TPP binding domain (TPP_enzyme_N)
Glyma.13G150200.Wm82.a4.v1	(1 of 2) 2.4.99.12 - Lipid IV(A) 3-deoxy-D-manno-octulosonic acid transferase / Lipid IV(A) KDO transferase
Glyma.13G154433.Wm82.a4.v1	(1 of 4) 2.4.1.10 - Levansucrase / Sucrose 6-fructosyltransferase
Glyma.13G155000.Wm82.a4.v1	-
Glyma.13G166200.Wm82.a4.v1	(1 of 6) K14515 - EIN3-binding F-box protein (EBF1_2)
Glyma.13G196100.Wm82.a4.v1	(1 of 9) PTHR12959 - GPI TRANSAMIDASE COMPONENT PIG-T-RELATED
Glyma.13G246302.Wm82.a4.v1	(1 of 2) PTHR12381//PTHR12381:SF13 - RIBONUCLEOPROTEIN // SUBFAMILY NOT NAMED
Glyma.13G278200.Wm82.a4.v1	(1 of 17) PTHR32212//PTHR32212:SF126 - FAMILY NOT NAMED // EMB|CAB62440.1-RELATED
Glyma.13G279300.Wm82.a4.v1	(1 of 3) PTHR12736//PTHR12736:SF13 - LANC-LIKE PROTEIN // SUBFAMILY NOT NAMED
Glyma.13G297851.Wm82.a4.v1	(1 of 3) PTHR24015:SF644 - PENTATRICOPEPTIDE REPEAT-CONTAINING PROTEIN
Glyma.13G301200.Wm82.a4.v1	(1 of 36) PF12609 - Wound-induced protein (DUF3774)
Glyma.13G301400.Wm82.a4.v1	(1 of 36) PF12609 - Wound-induced protein (DUF3774)
Glyma.13G313000.Wm82.a4.v1	(1 of 4) PTHR13902:SF66 - TRANSCRIPTION FACTOR LHW
Glyma.13G318400.Wm82.a4.v1	(1 of 53) PTHR24351 - RIBOSOMAL PROTEIN S6 KINASE
Glyma.13G345000.Wm82.a4.v1	(1 of 99) PF01535//PF13041//PF14432 - PPR repeat (PPR) // PPR repeat family (PPR_2) // DYW family of nucleic acid deaminases (DYW_deaminase)
Glyma.13G348900.Wm82.a4.v1	-
Glyma.13G351450.Wm82.a4.v1	(1 of 4) PTHR27001//PTHR27001:SF152 - FAMILY NOT NAMED // GENOMIC DNA, CHROMOSOME 3, P1 CLONE:MMM17-RELATED
Glyma.13G352700.Wm82.a4.v1	(1 of 2) PTHR27003//PTHR27003:SF44 - FAMILY NOT NAMED // LRR RECEPTOR-LIKE SERINE/THREONINE-PROTEIN KINASE MEE39-RELATED
Glyma.13G355900.Wm82.a4.v1	(1 of 2) PTHR13360//PTHR13360:SF1 - FAMILY NOT NAMED // ACTIVATING SIGNAL COINTEGRATOR 1 COMPLEX SUBUNIT 1
Glyma.13G368066.Wm82.a4.v1	(1 of 9) PTHR12959 - GPI TRANSAMIDASE COMPONENT PIG-T-RELATED
Glyma.14G026700.Wm82.a4.v1	(1 of 6) PTHR23257//PTHR23257:SF378 - SERINE-THREONINE PROTEIN KINASE // INTEGRIN-LINKED PROTEIN KINASE FAMILY PROTEIN-RELATED
Glyma.14G057400.Wm82.a4.v1	(1 of 28) PF07714//PF08263//PF13855 - Protein tyrosine kinase (Pkinase_Tyr) // Leucine rich repeat N-terminal domain (LRRNT_2) // Leucine rich repeat (LRR_8)
Glyma.14G075400.Wm82.a4.v1	-
Glyma.14G095900.Wm82.a4.v1	(1 of 1) PTHR10593//PTHR10593:SF25 - SERINE/THREONINE-PROTEIN KINASE RIO // SUBFAMILY NOT NAMED
Glyma.14G103700.Wm82.a4.v1	-
Glyma.14G118550.Wm82.a4.v1	(1 of 83) PF10250 - GDP-fucose protein O-fucosyltransferase (O-FucT)
Glyma.14G124550.Wm82.a4.v1	(1 of 5) PTHR23105//PTHR23105:SF41 - RIBOSOMAL PROTEIN L7AE FAMILY MEMBER // SUBFAMILY NOT NAMED
Glyma.14G124700.Wm82.a4.v1	(1 of 49) KOG0472//KOG1187 - Leucine-rich repeat protein // Serine/threonine protein kinase
Glyma.14G126600.Wm82.a4.v1	-
Glyma.14G145200.Wm82.a4.v1	(1 of 2) PTHR30603//PTHR30603:SF13 - RNA POLYMERASE SIGMA FACTOR RPO // RNA POLYMERASE SIGMA FACTOR SIGC
Glyma.14G155700.Wm82.a4.v1	-
Glyma.14G156700.Wm82.a4.v1	(1 of 1) PTHR15544//PTHR15544:SF0 - OSMOSIS RESPONSIVE FACTOR // TETRATRICOPEPTIDE REPEAT PROTEIN 33
Glyma.14G168800.Wm82.a4.v1	-
Glyma.14G170100.Wm82.a4.v1	(1 of 6) PTHR33059:SF4 - F28K19.24-RELATED
Glyma.14G188900.Wm82.a4.v1	(1 of 3) PTHR11361:SF81 - DNA MISMATCH REPAIR PROTEIN MUTS, TYPE 2
Glyma.14G190300.Wm82.a4.v1	(1 of 2) PTHR14155//PTHR14155:SF184 - RING FINGER DOMAIN-CONTAINING // SUBFAMILY NOT NAMED
Glyma.14G197600.Wm82.a4.v1	(1 of 4) PTHR10366:SF369 - CINNAMOYL-COA REDUCTASE-LIKE PROTEIN
Glyma.15G001000.Wm82.a4.v1	-
Glyma.15G002200.Wm82.a4.v1	(1 of 2) 1.14.13.78 - Ent-kaurene oxidase
Glyma.15G018200.Wm82.a4.v1	(1 of 1) K18666 - activating signal cointegrator complex subunit 1 (ASCC1)
Glyma.15G039400.Wm82.a4.v1	-
Glyma.15G051700.Wm82.a4.v1	(1 of 4) K14298 - mRNA export factor (RAE1, GLE2)
Glyma.15G079700.Wm82.a4.v1	(1 of 36) PTHR18934 - ATP-DEPENDENT RNA HELICASE
Glyma.15G092700.Wm82.a4.v1	(1 of 2) K03861 - phosphatidylinositol glycan, class P (PIGP, GPI19, DSCR5)
[truncated: 258 more rows]

## Sheet: Table S5
Table S5 Infomation of most highly connected 30 hub genes
Gene id	Connectivity	Module	Pathway
Glyma.07G190100.Wm82.a4.v1	473.644	turquoise	-
Glyma.12G185400.Wm82.a4.v1	464.4	turquoise	Plant-pathogen interaction (map04626)
Glyma.01G036000.Wm82.a4.v1	460.391	turquoise	Tryptophan metabolism pathway (map00380) and Glucosinolate biosynthesis (map00966)
Glyma.02G080200.Wm82.a4.v1	449.665	turquoise	-
Glyma.01G225100.Wm82.a4.v1	449.263	turquoise	MAPK signaling pathway - plant Pathway (map04016) and Plant hormone signal transduction (map04075)
Glyma.02G255000.Wm82.a4.v1	447.2	turquoise	-
Glyma.18G183451.Wm82.a4.v1	446.948	turquoise	-
Glyma.01G014700.Wm82.a4.v1	446.178	turquoise	-
Glyma.07G076600.Wm82.a4.v1	444.284	turquoise	-
Glyma.03G157700.Wm82.a4.v1	443.674	turquoise	-
Glyma.08G145300.Wm82.a4.v1	441.866	turquoise	-
Glyma.11G046200.Wm82.a4.v1	441.12	turquoise	-
Glyma.07G133800.Wm82.a4.v1	439.975	turquoise	-
Glyma.05G195000.Wm82.a4.v1	437.323	turquoise	-
Glyma.10G151300.Wm82.a4.v1	436.974	turquoise	-
Glyma.04G033300.Wm82.a4.v1	436.478	turquoise	-
Glyma.02G254600.Wm82.a4.v1	436.032	turquoise	-
Glyma.06G148400.Wm82.a4.v1	435.053	turquoise	-
Glyma.16G031900.Wm82.a4.v1	433.514	turquoise	MAPK signaling pathway - plant (map04016) and Plant-pathogen interaction(map04626)
Glyma.08G363800.Wm82.a4.v1	433.419	turquoise	-
Glyma.06G090900.Wm82.a4.v1	431.423	turquoise	-
Glyma.11G230100.Wm82.a4.v1	430.433	turquoise	Phosphatidylinositol signaling system (map04070), AGE-RAGE signaling pathway in diabetic complications (map04933) and Inositol phosphate metabolism (map00562)
Glyma.12G022800.Wm82.a4.v1	426.643	turquoise	-
Glyma.14G212200.Wm82.a4.v1	425.579	turquoise	-
Glyma.19G164600.Wm82.a4.v1	425.101	turquoise	-
Glyma.17G028400.Wm82.a4.v1	424.812	turquoise	-
Glyma.09G253200.Wm82.a4.v1	423.857	turquoise	-
Glyma.17G035400.Wm82.a4.v1	423.126	turquoise	-
Glyma.17G048100.Wm82.a4.v1	422.475	turquoise	-
Glyma.04G175300.Wm82.a4.v1	421.39	turquoise	Plant-pathogen interaction (map04626)

## Sheet: Table S6
Table S6 DEGs ID information of three major resistance-related pathways
KEGG pathway	Gene_IDs
Plant-pathogen interaction	Glyma.01G010500.Wm82.a4.v1Glyma.01G010700.Wm82.a4.v1Glyma.01G128100.Wm82.a4.v1Glyma.01G166100.Wm82.a4.v1Glyma.01G222300.Wm82.a4.v1Glyma.02G008500.Wm82.a4.v1Glyma.02G132900.Wm82.a4.v1Glyma.02G232600.Wm82.a4.v1Glyma.02G245700.Wm82.a4.v1Glyma.03G042700.Wm82.a4.v1Glyma.03G138000.Wm82.a4.v1Glyma.03G236300.Wm82.a4.v1Glyma.03G260300.Wm82.a4.v1Glyma.04G136600.Wm82.a4.v1Glyma.04G149300.Wm82.a4.v1Glyma.04G…
MAPK signaling pathway	Glyma.01G018400.Wm82.a4.v1Glyma.01G128100.Wm82.a4.v1Glyma.01G219001.Wm82.a4.v1Glyma.01G222300.Wm82.a4.v1Glyma.01G225100.Wm82.a4.v1Glyma.02G232600.Wm82.a4.v1Glyma.03G042700.Wm82.a4.v1Glyma.03G088800.Wm82.a4.v1Glyma.03G236300.Wm82.a4.v1Glyma.04G053800.Wm82.a4.v1Glyma.04G066900.Wm82.a4.v1Glyma.04G205400.Wm82.a4.v1Glyma.05G079700.Wm82.a4.v1Glyma.05G132900.Wm82.a4.v1Glyma.05G211900.Wm82.a4.v1Glyma.06G…
Plant hormone signal transduction	Glyma.01G018400.Wm82.a4.v1Glyma.01G190600.Wm82.a4.v1Glyma.01G204400.Wm82.a4.v1Glyma.01G225100.Wm82.a4.v1Glyma.02G069400.Wm82.a4.v1Glyma.02G087000.Wm82.a4.v1Glyma.04G006900.Wm82.a4.v1Glyma.04G053800.Wm82.a4.v1Glyma.04G066900.Wm82.a4.v1Glyma.04G205400.Wm82.a4.v1Glyma.05G097300.Wm82.a4.v1Glyma.05G101300.Wm82.a4.v1Glyma.06G126100.Wm82.a4.v1Glyma.06G160100.Wm82.a4.v1Glyma.06G243500.Wm82.a4.v1Glyma.07G…
